# Supplementary material for: Organic matter transformations are disconnected between surface water and the hyporheic zone
Source: Copernicus journal article supplement (doi:10.5194/bg-19-3099-2022), 2022-07-01

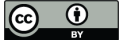

*Supplement of*

## **Organic matter transformations are disconnected between surface water and the hyporheic zone**

**James C. Stegen et al.**

*Correspondence to:* James C. Stegen ([james.stegen@pnnl.gov](mailto:james.stegen@pnnl.gov))

The copyright of individual parts of the supplement might differ from the article licence.

**Table S1.** Definitions of acronyms used in the manuscript. Acronyms are also defined upon first use.

| <b>Acronym/Abbreviation</b> | <b>Definition</b>                                                            |
|-----------------------------|------------------------------------------------------------------------------|
| OM                          | Organic Matter                                                               |
| FTICR-MS                    | Fourier Transform Ion Cyclotron Resonance Mass Spectrometry                  |
| SW                          | Surface Water                                                                |
| Sed.                        | Sediment                                                                     |
| MAP                         | Mean Annual Precipitation                                                    |
| MAT                         | Mean Annual Temperature                                                      |
| PET                         | Potential Evapotranspiration                                                 |
| AET                         | Actual Evapotranspiration                                                    |
| Da                          | Dalton                                                                       |
| ppm                         | Parts per Million                                                            |
| S/N                         | Signal-to-Noise Ratio                                                        |
| m/z                         | Mass-to-Charge Ratio                                                         |
| ml                          | Milliliter                                                                   |
| mg                          | Milligram                                                                    |
| NPOC                        | Non-Purgable Organic Carbon                                                  |
| DI                          | Deionized                                                                    |
| PNNL                        | Pacific Northwest National Lab                                               |
| EMSL                        | Environmental Molecular Science Lab                                          |
| WHONDRS                     | Worldwide Hydrobiogeochemistry Observation Network for Dynamic River Systems |
| ConUS                       | Contiguous United States                                                     |

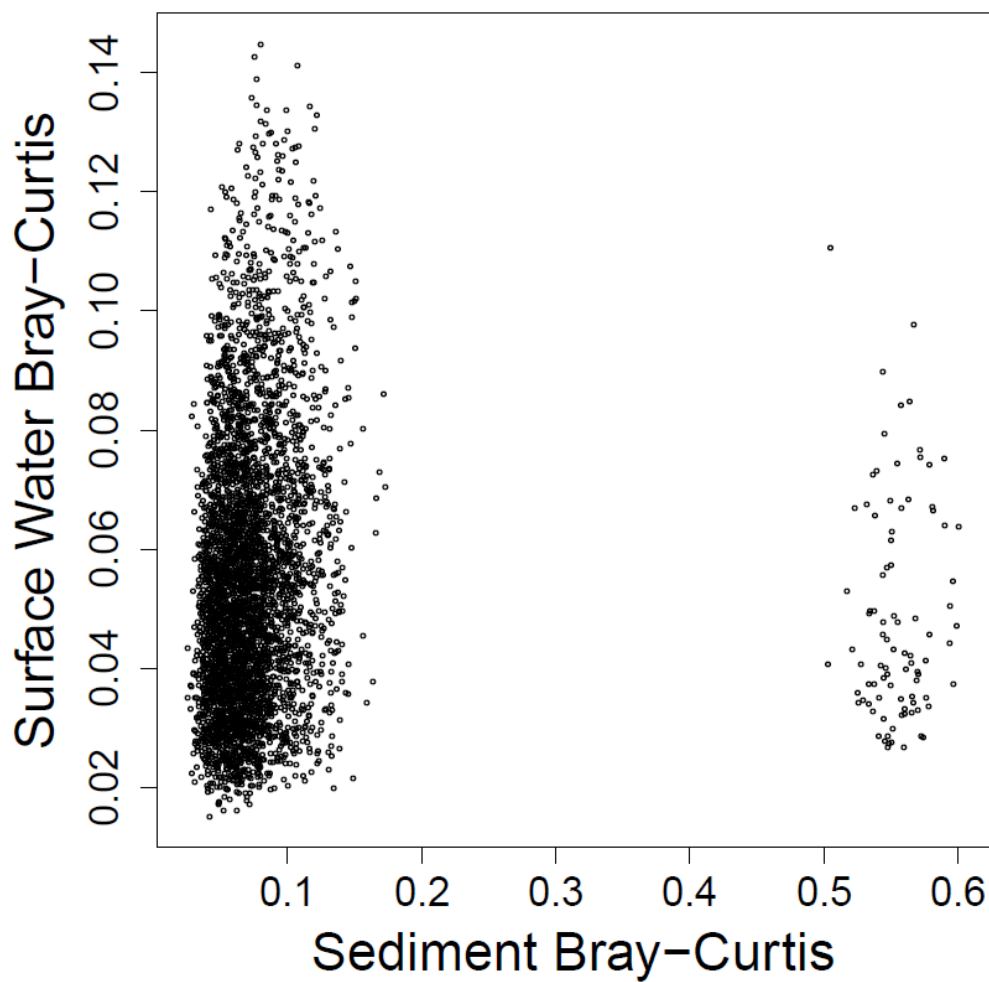

**Figure S1 (above).** Transformation profiles in sediments and surface water were weakly related to each other. Bray-Curtis dissimilarities in surface water and sediments are plotted against each other. Relative to Figure 4, this figure includes all pairwise comparisons for an outlier sample. The conceptual inference remains the same as that from Figure 4; there is no meaningful relationship between surface water and sediment OM transformation profiles.

**Additional Supplementary Figures (below).** Regression analysis for the number of abiotic and biotic transformations related to different potential explanatory variables. Panels use abbreviations and acronyms as follows: sediment (Sed.) and surface water (SW) transformation counts and latitude, longitude, mean annual precipitation (MAP), mean annual temperature (MAT), potential evapotranspiration (PET), and actual evapotranspiration (AET). Each open circle is from one sampling site. Regression statistics are provided on each panel and the solid line represents the regression model, even if it was not significant. See Table S1 for all acronyms and abbreviations.

# Sediment

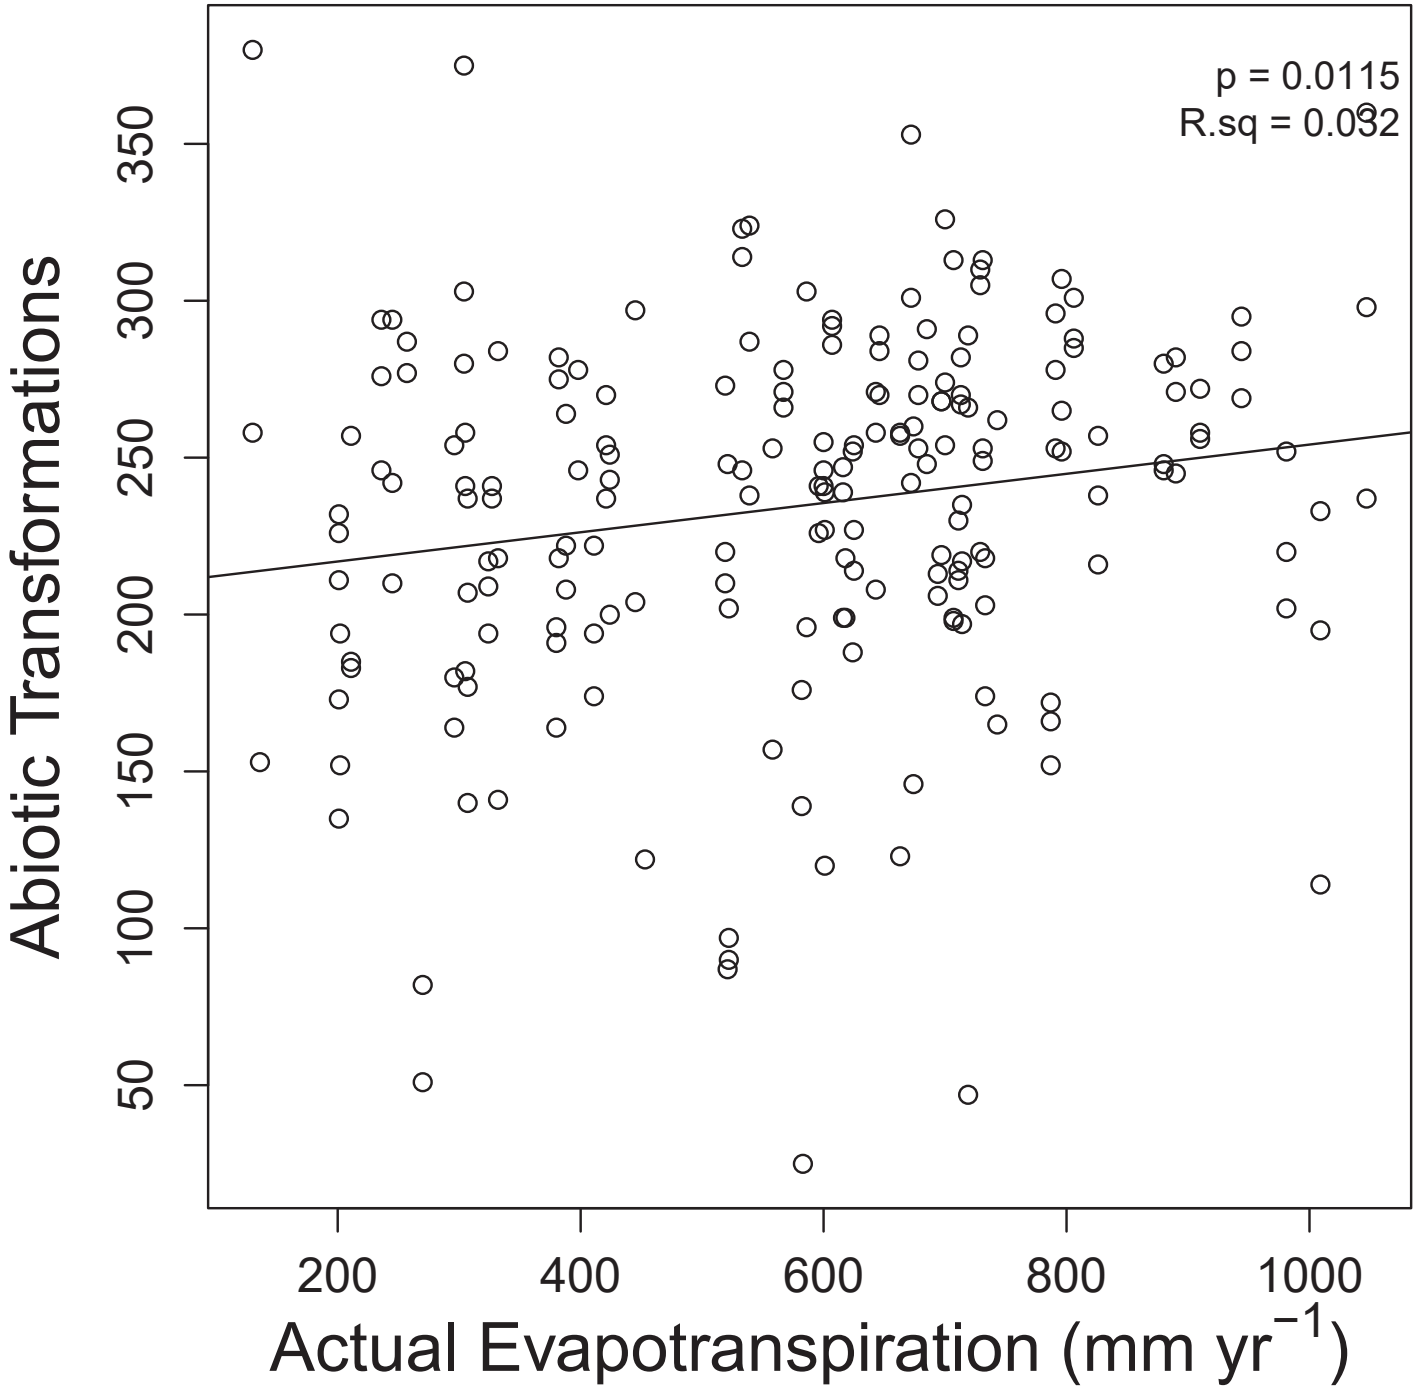

# Surface Water

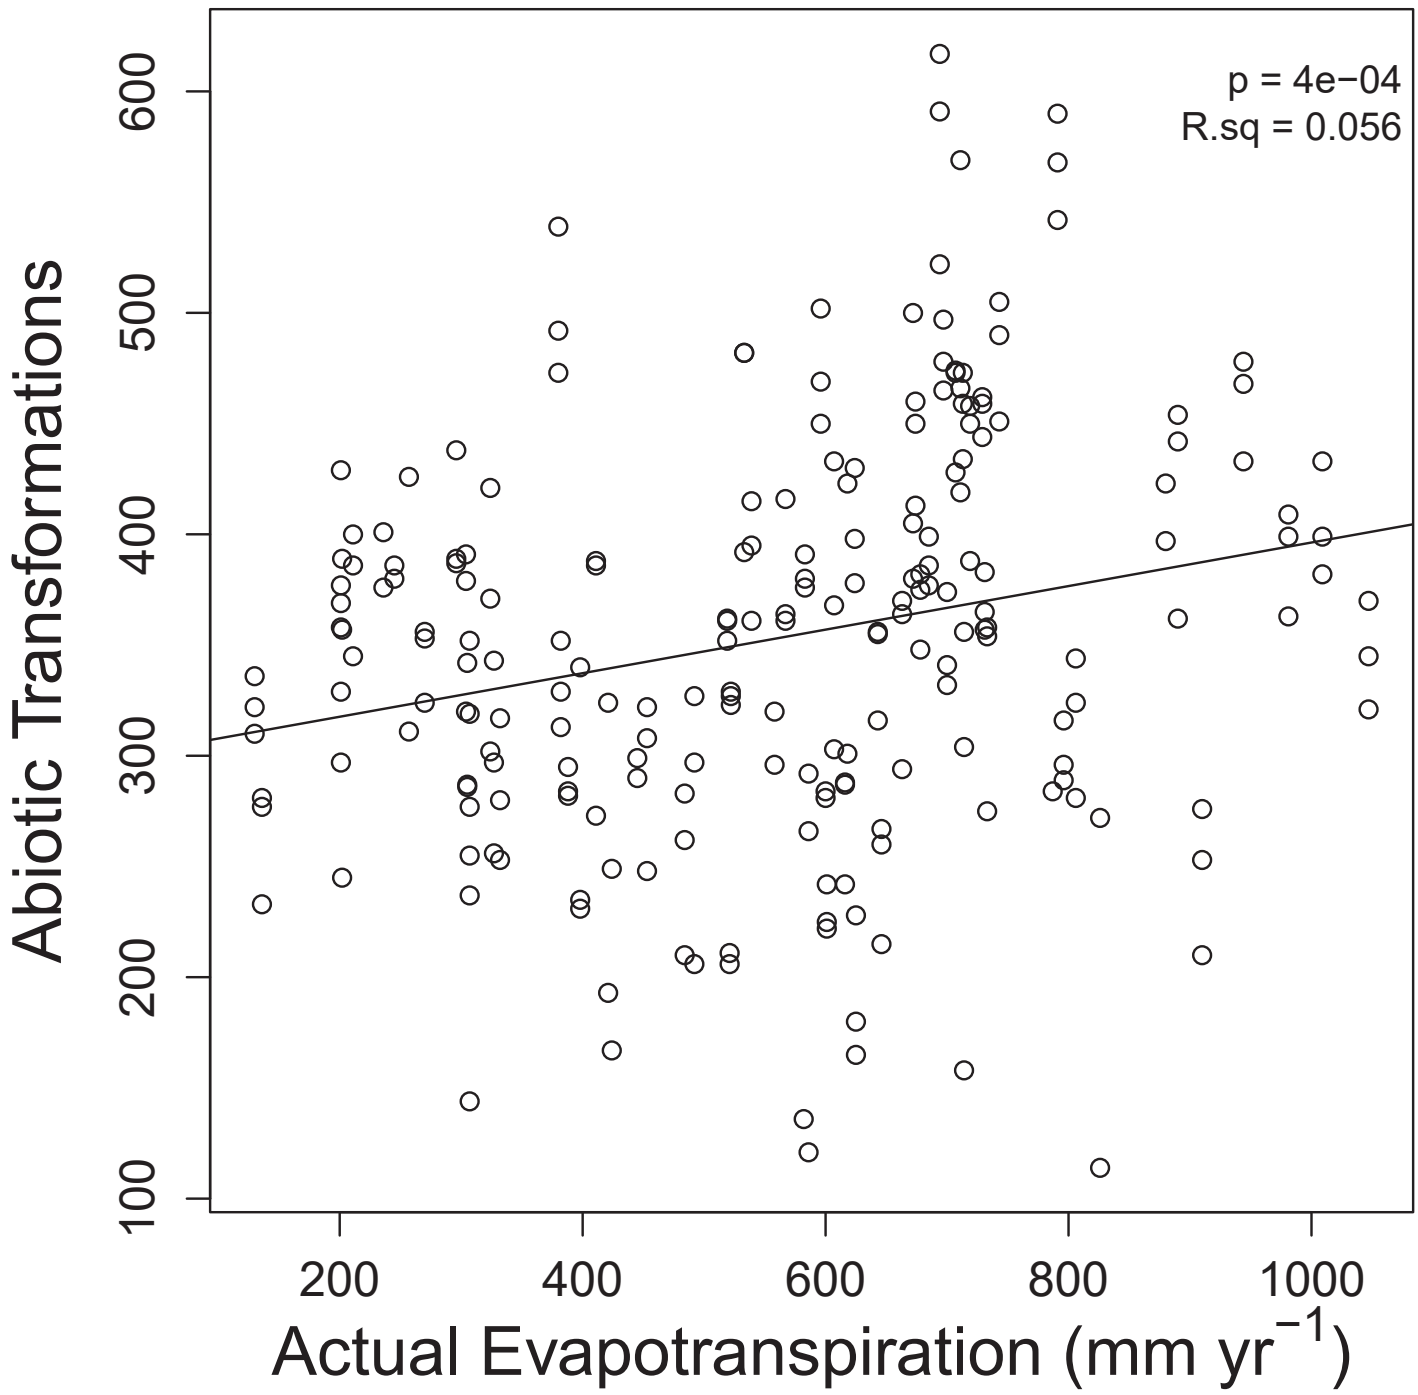

# Sediment

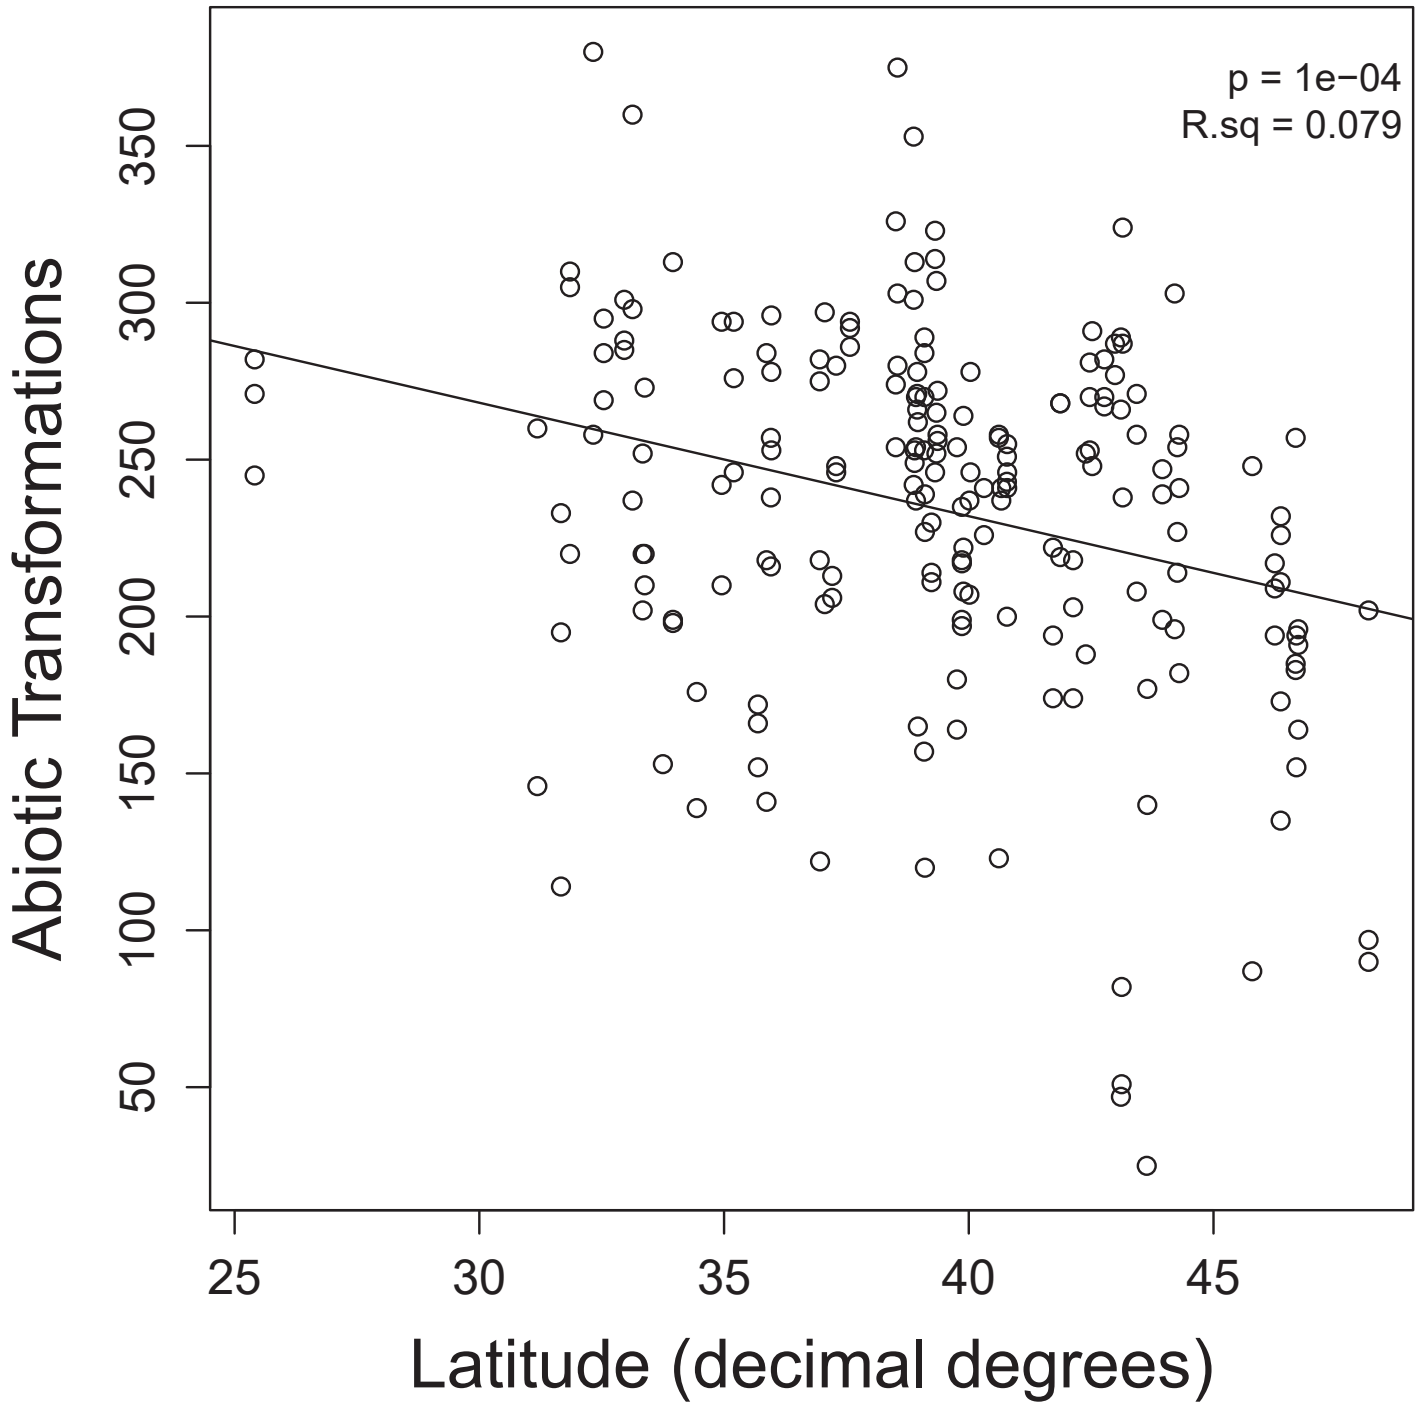

# Surface Water

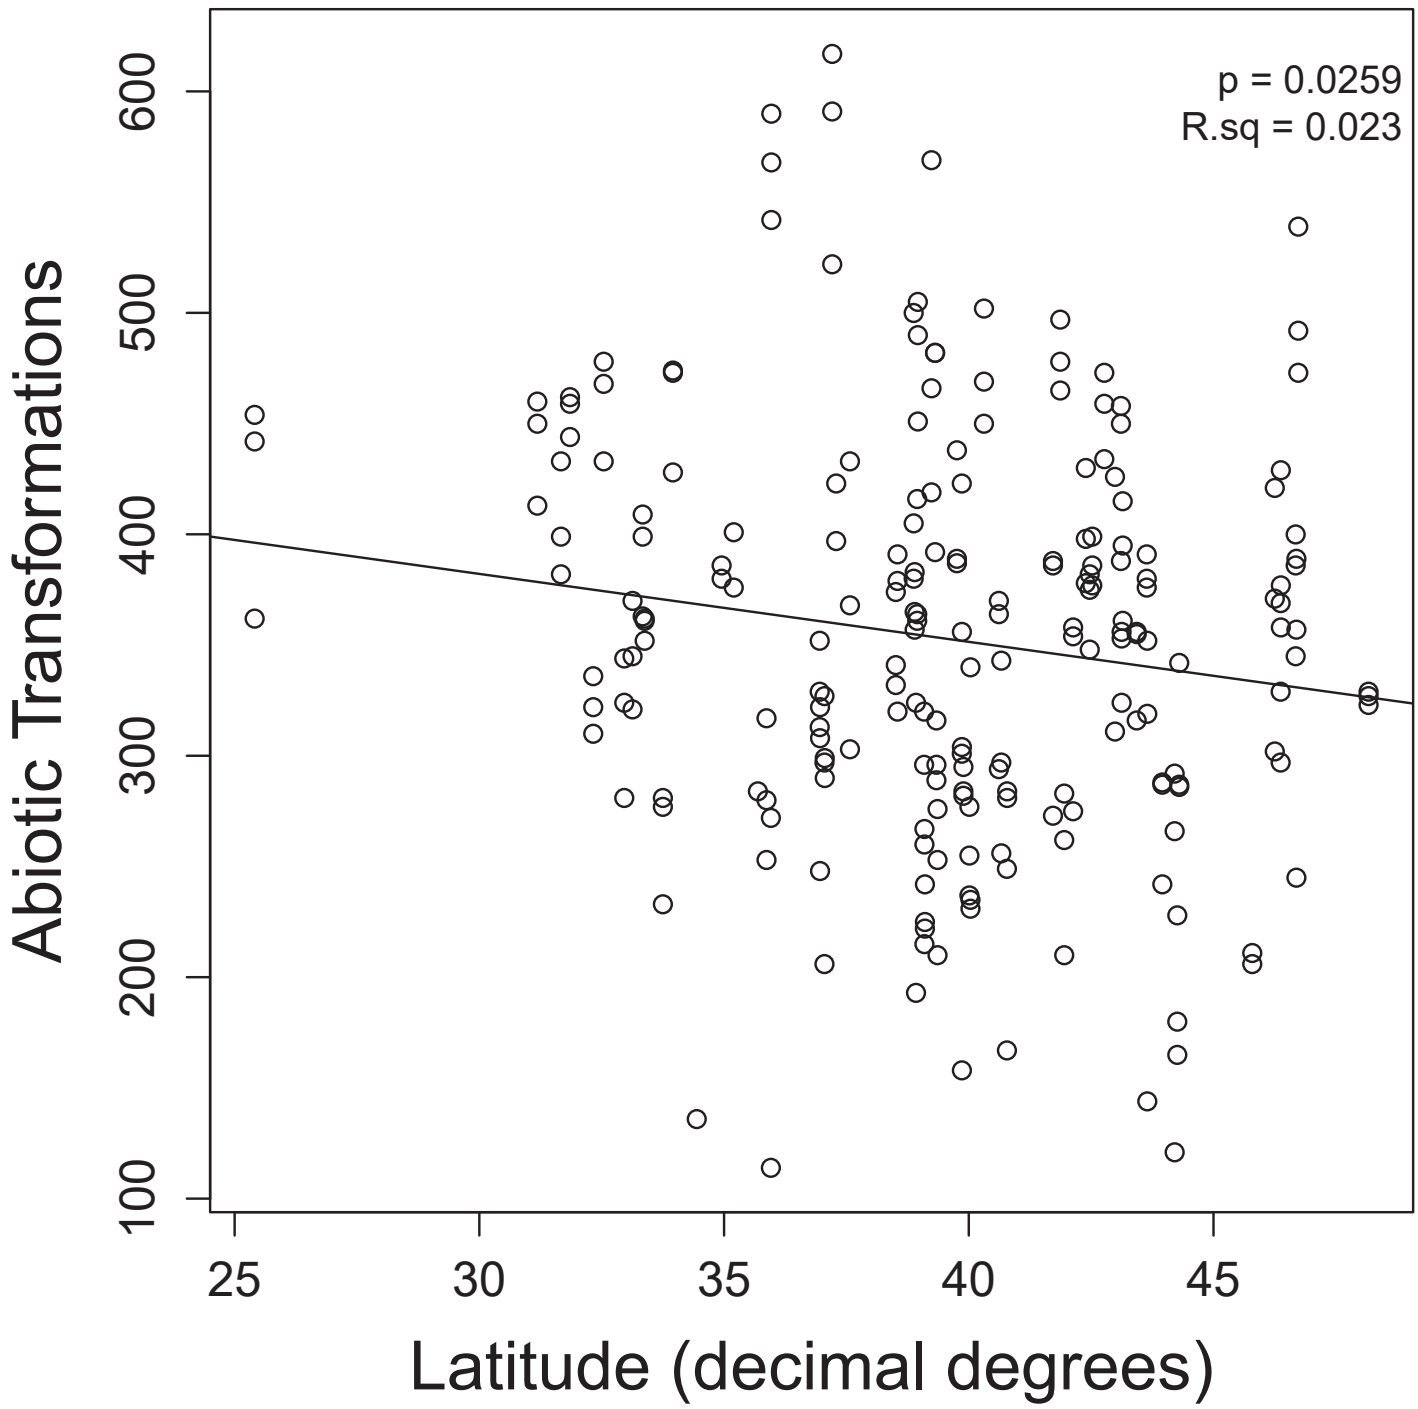



# Sediment

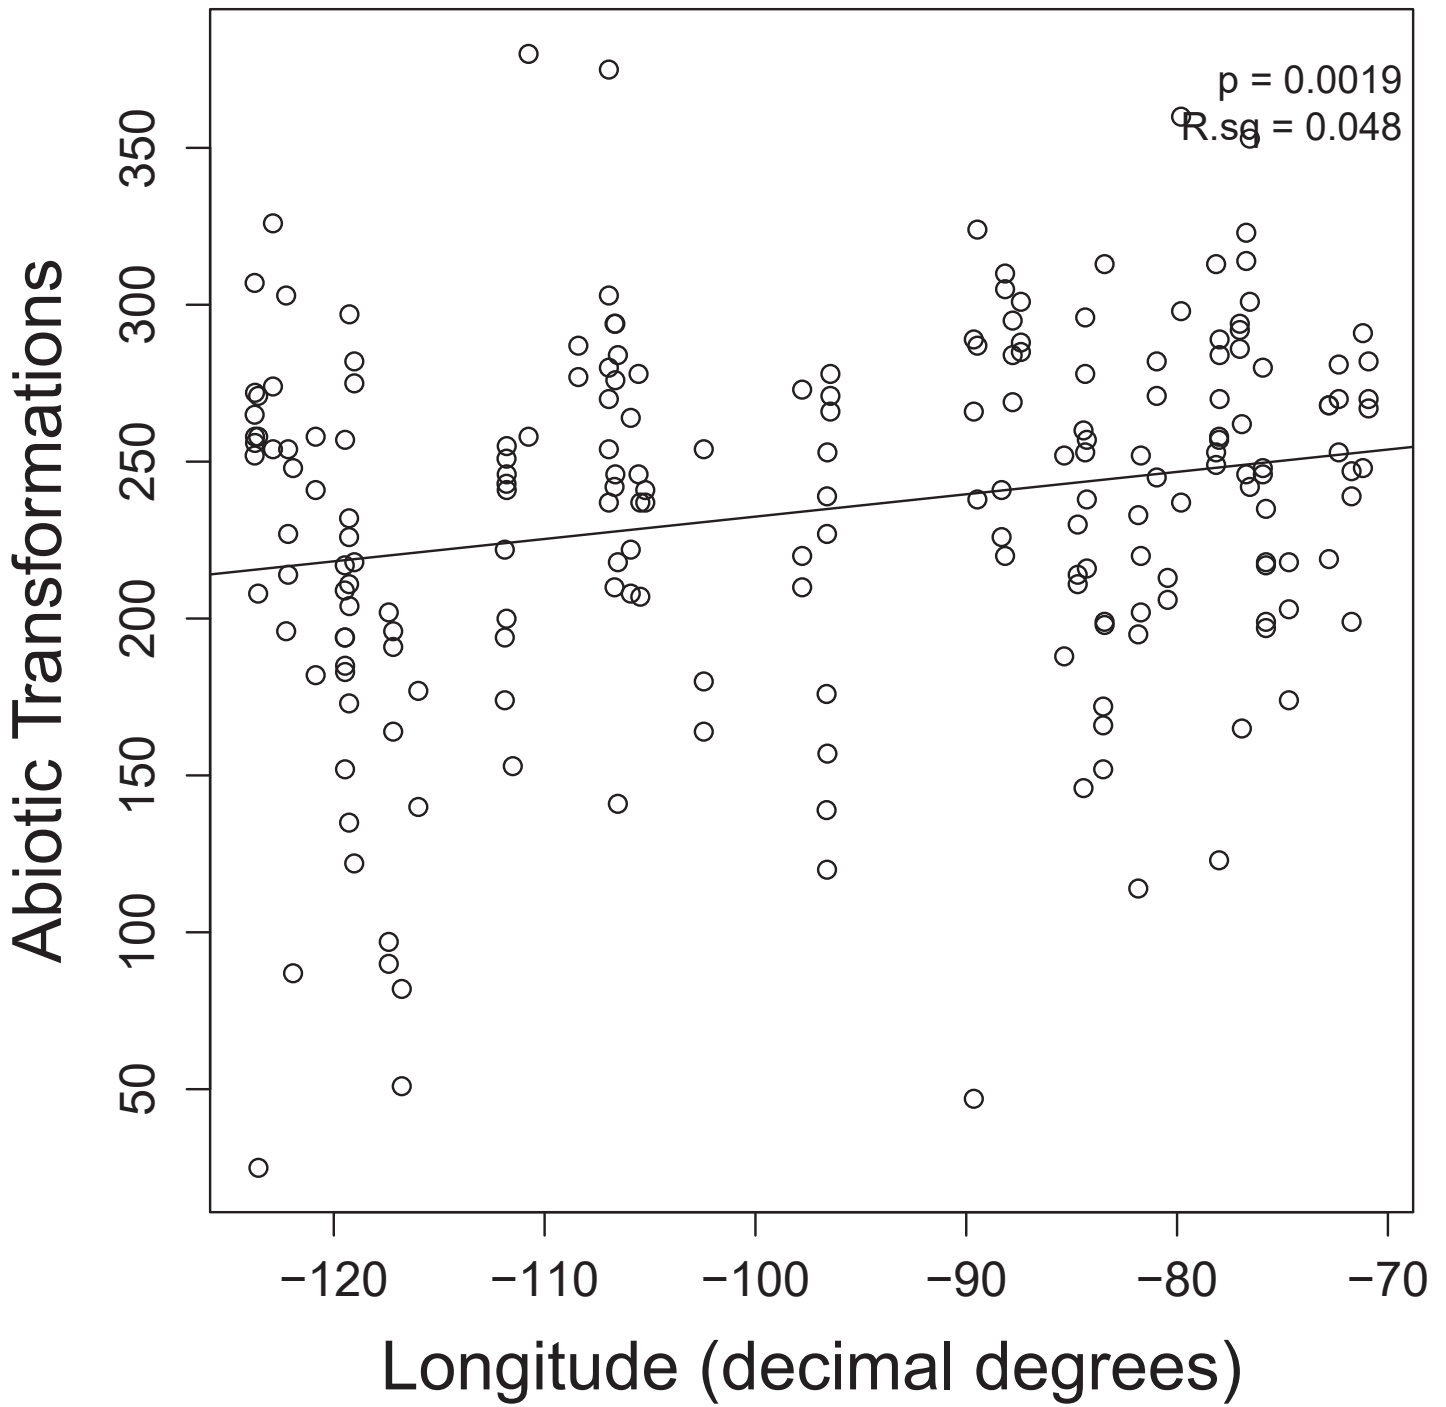

# Surface Water

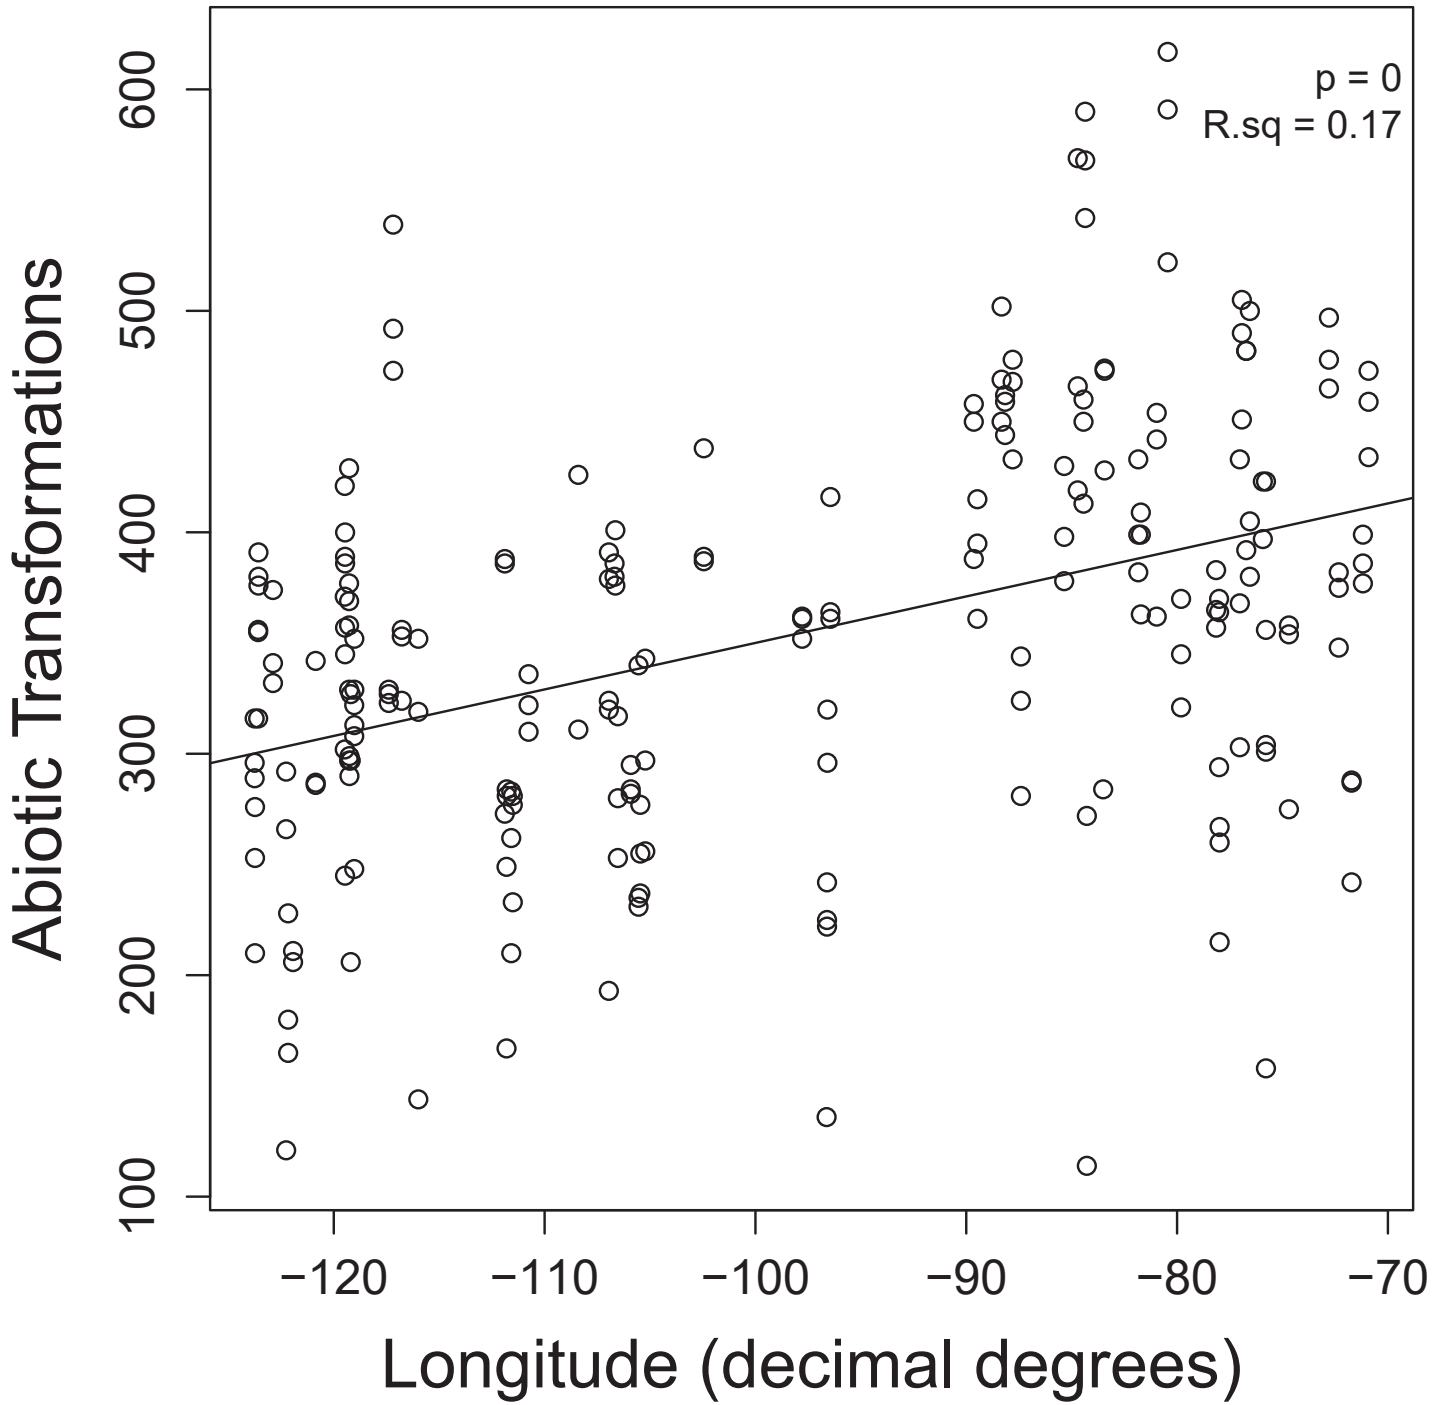

# Sediment

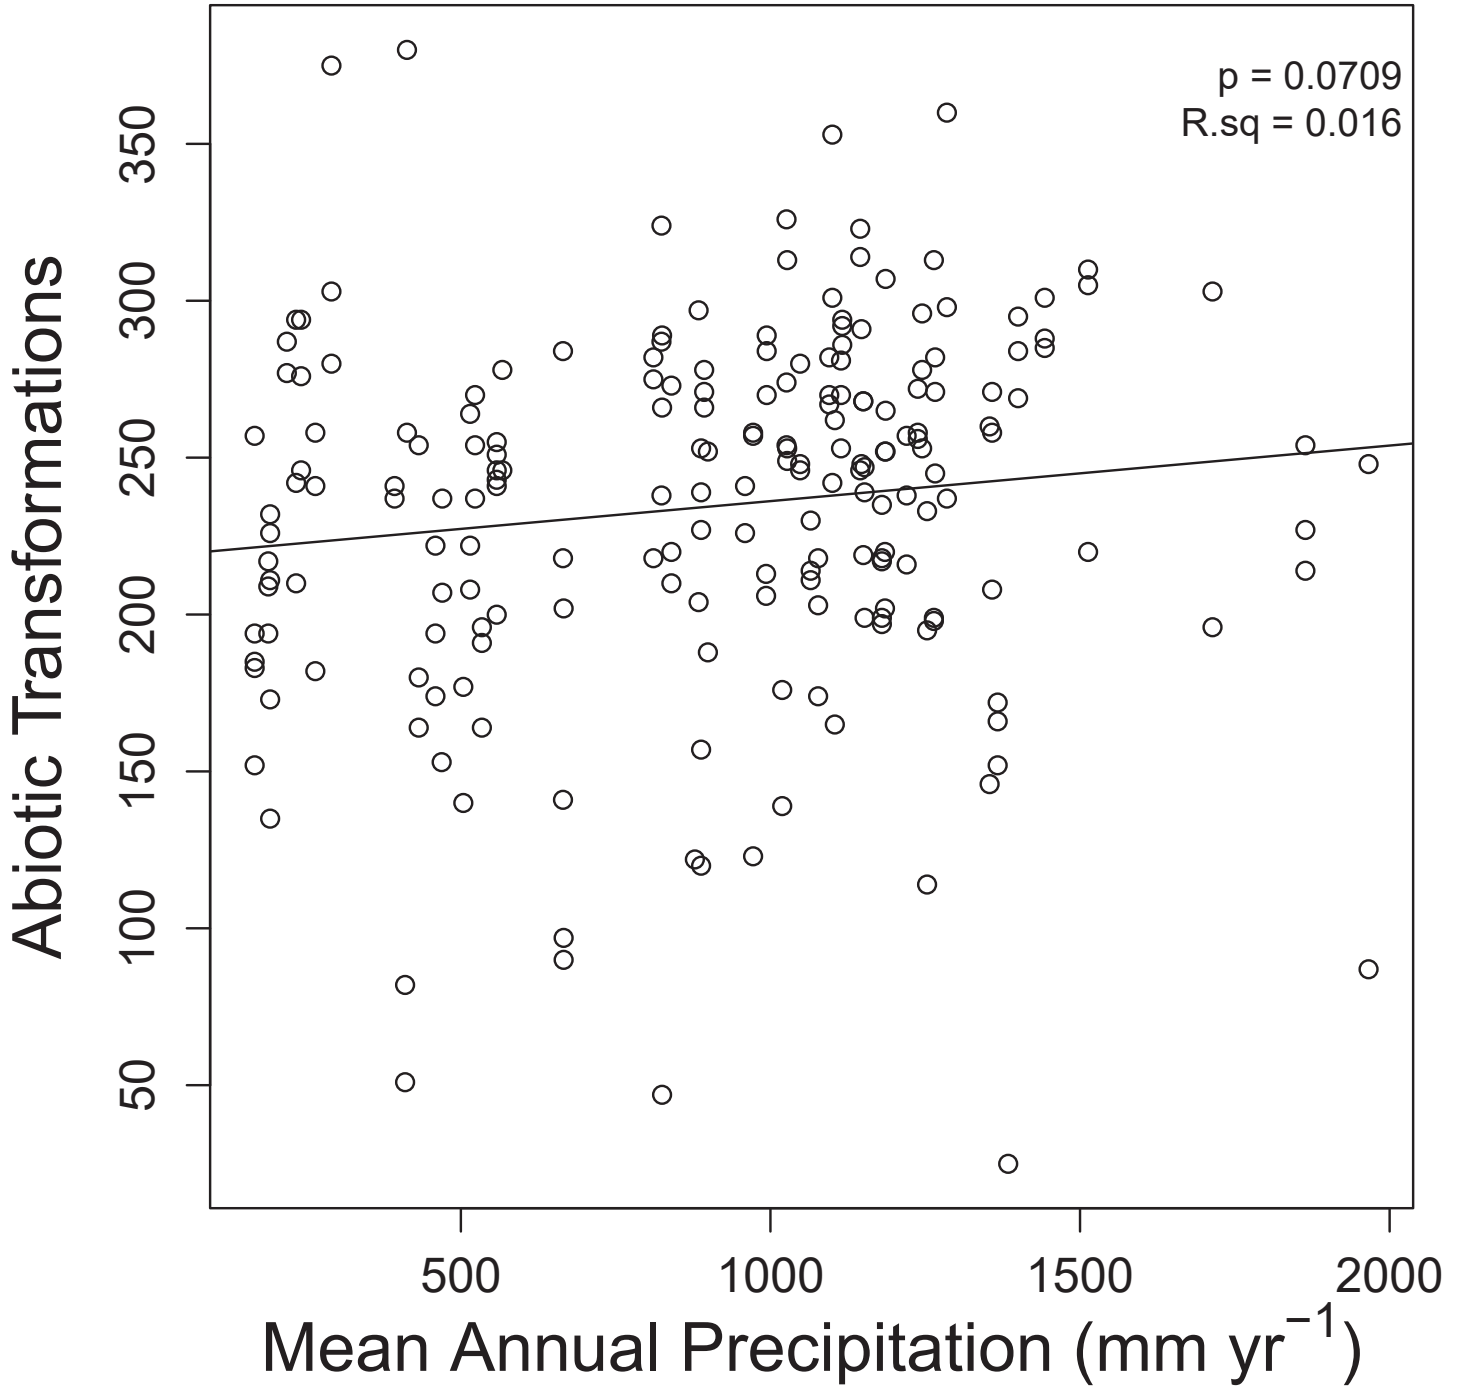

# Surface Water

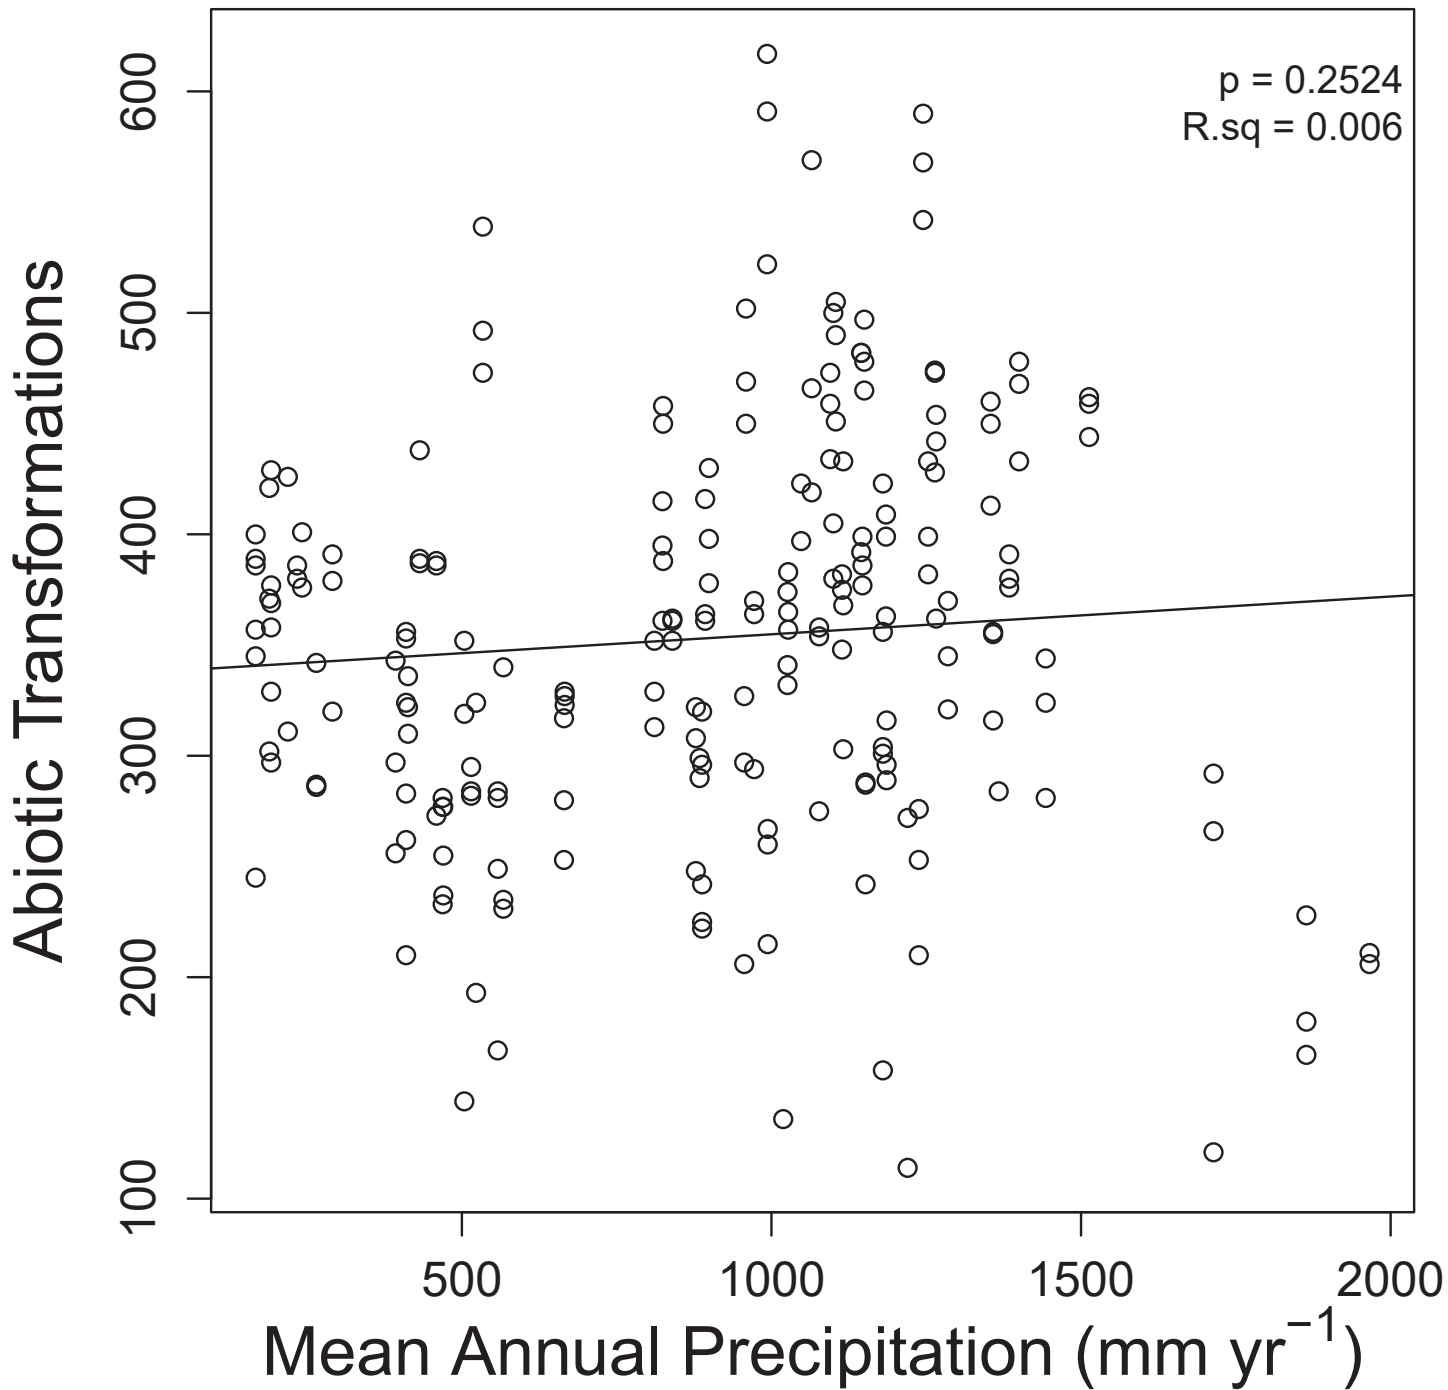

# Sediment

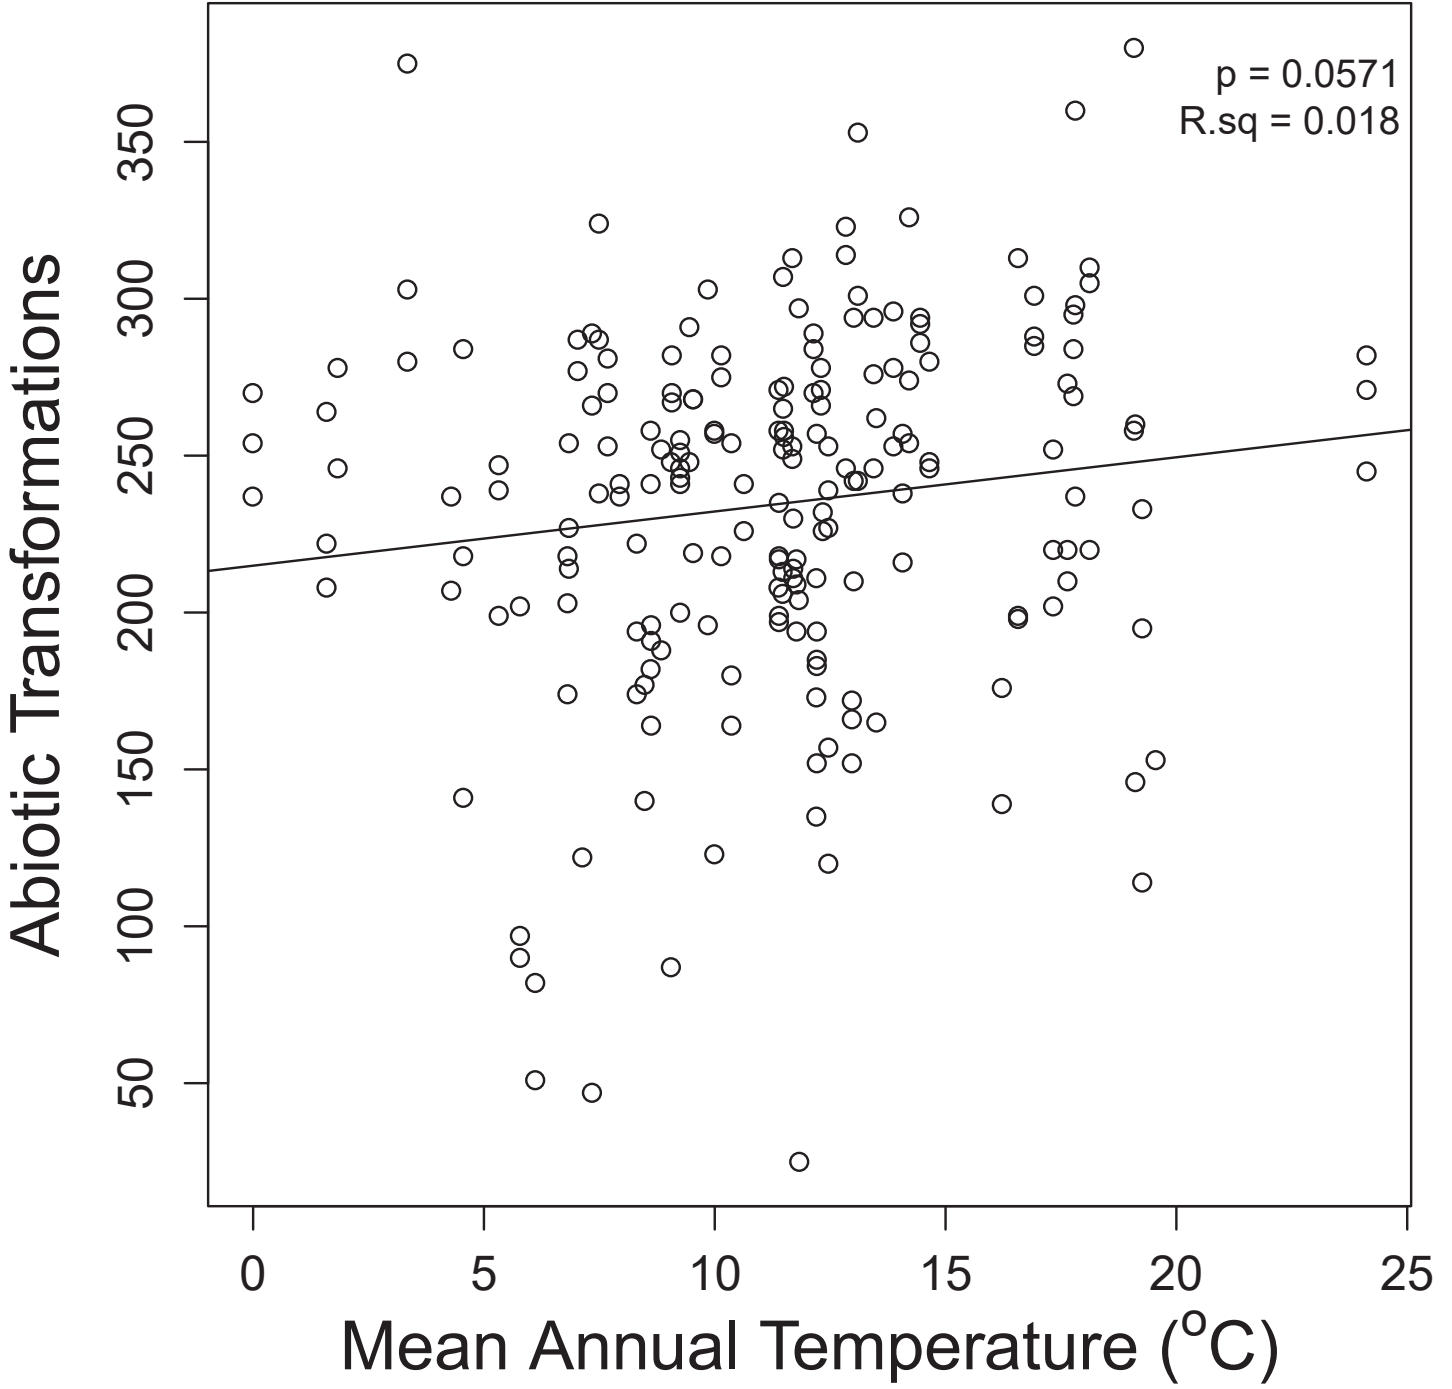

# Surface Water

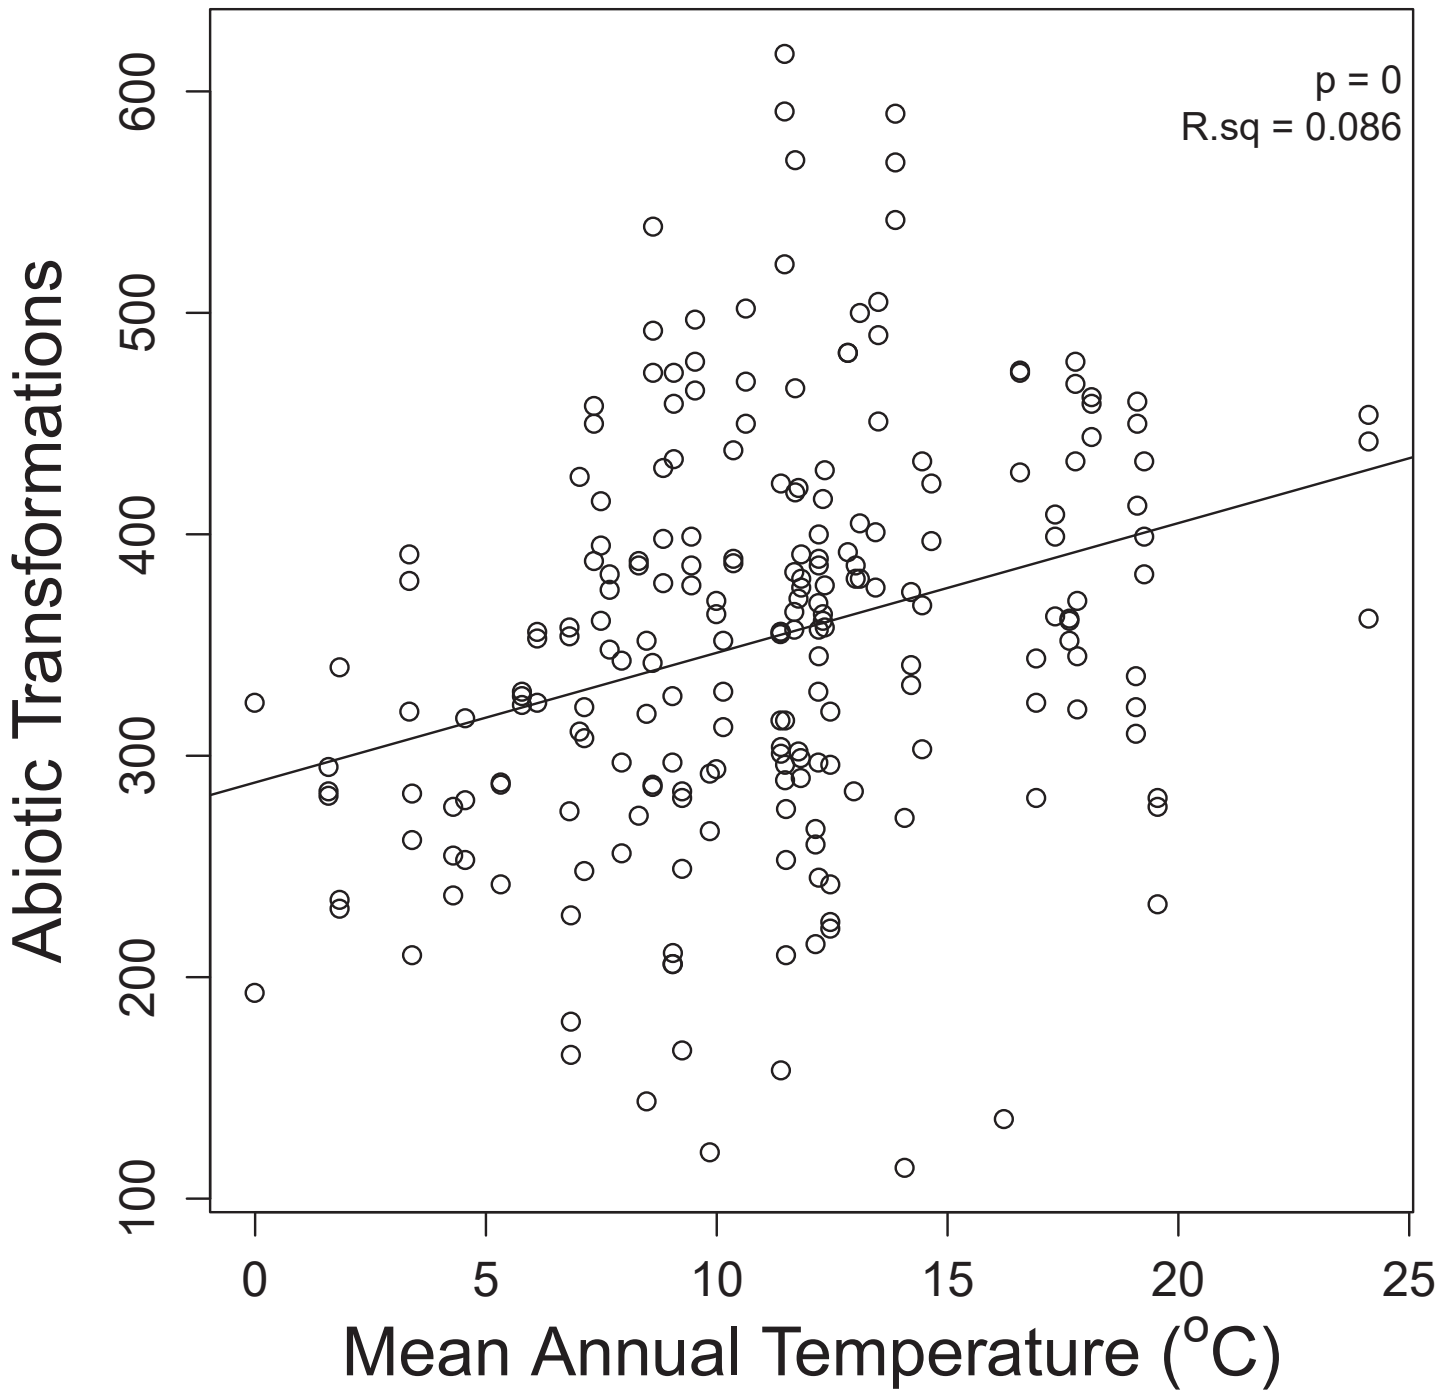

# Sediment

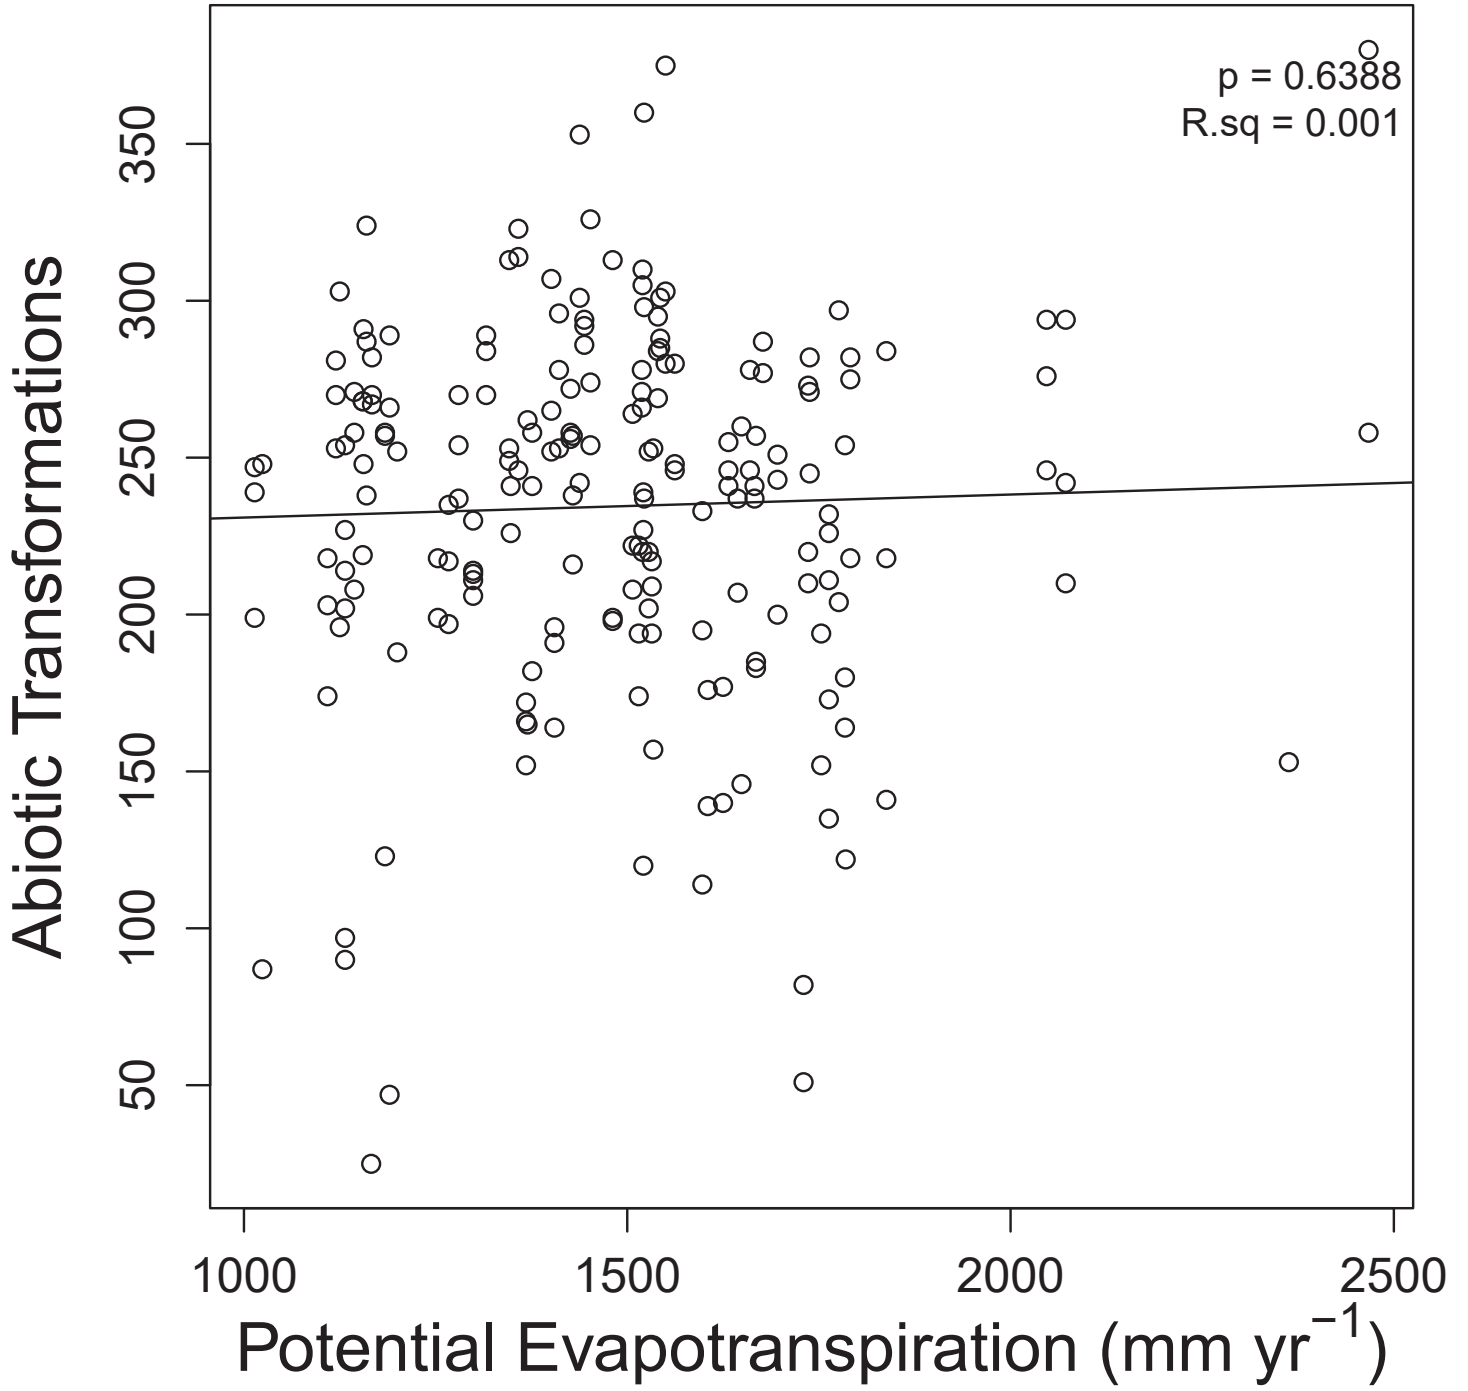

# Surface Water

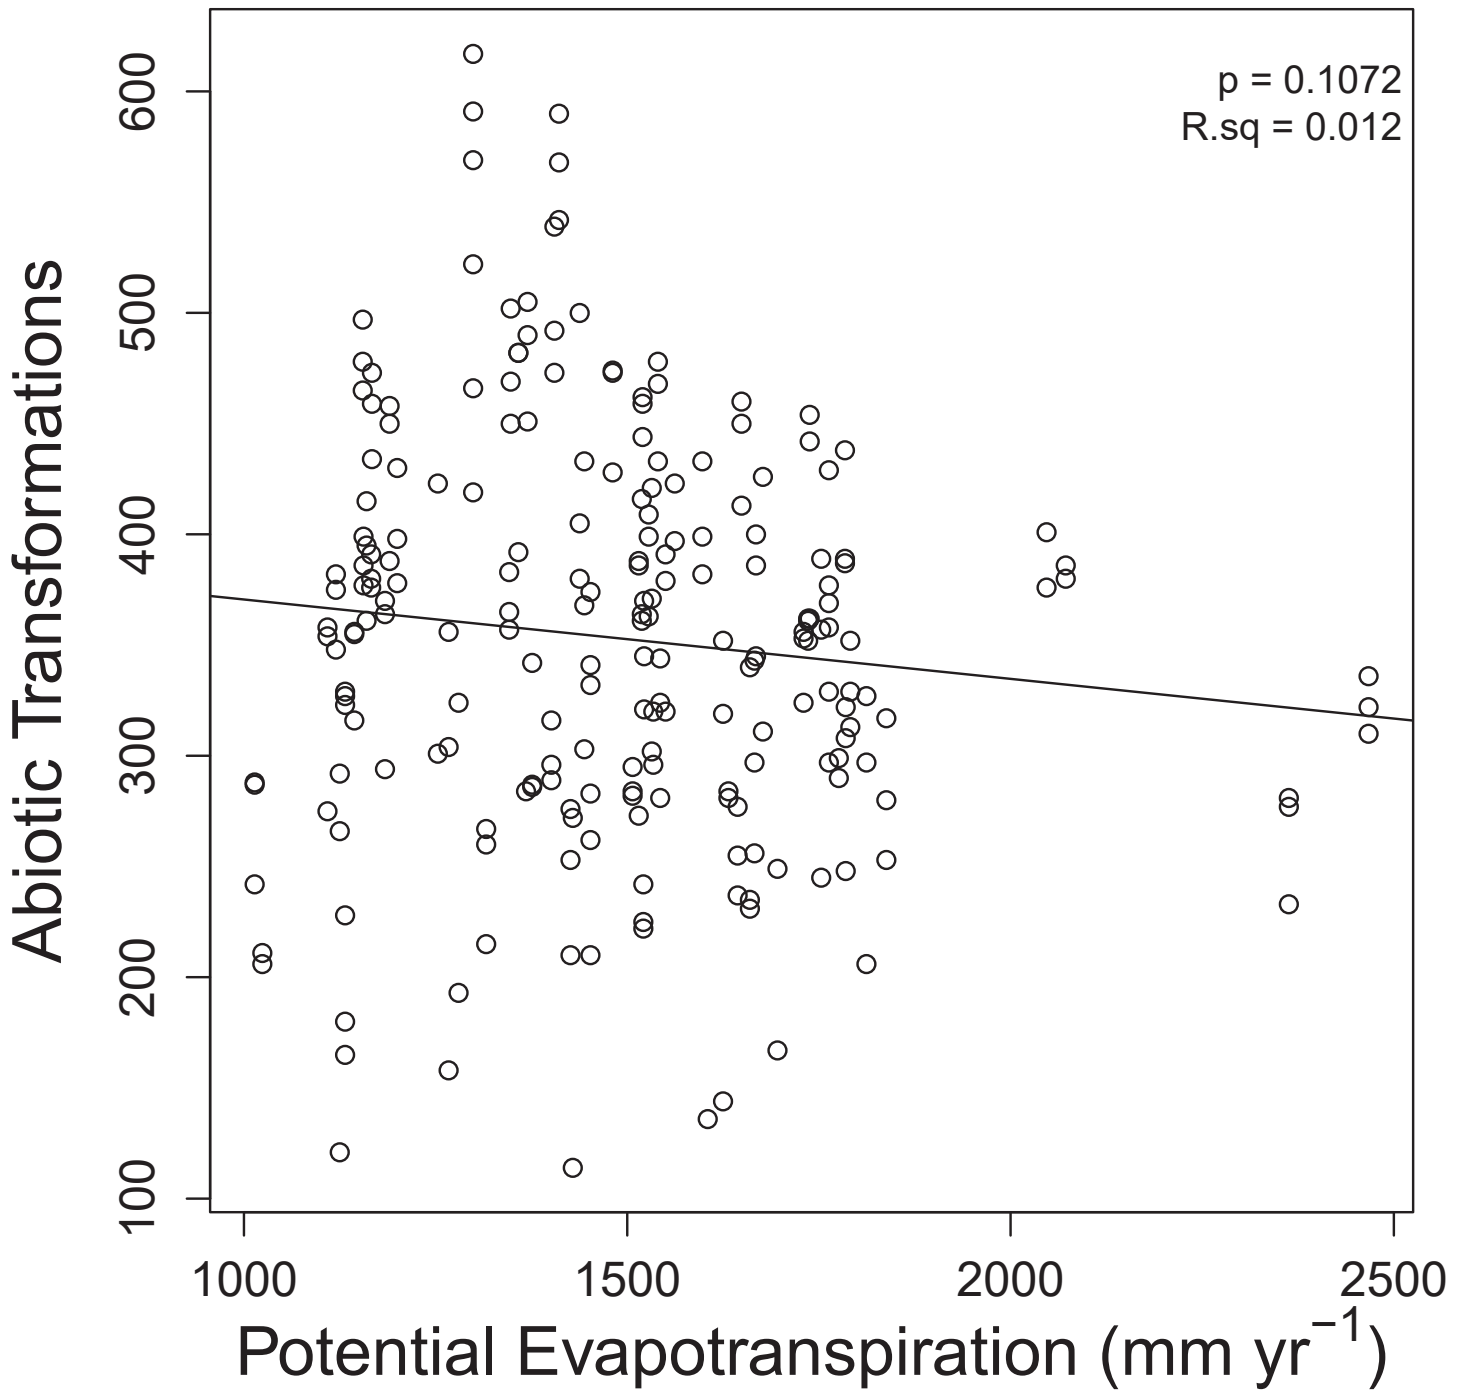



# Sediment

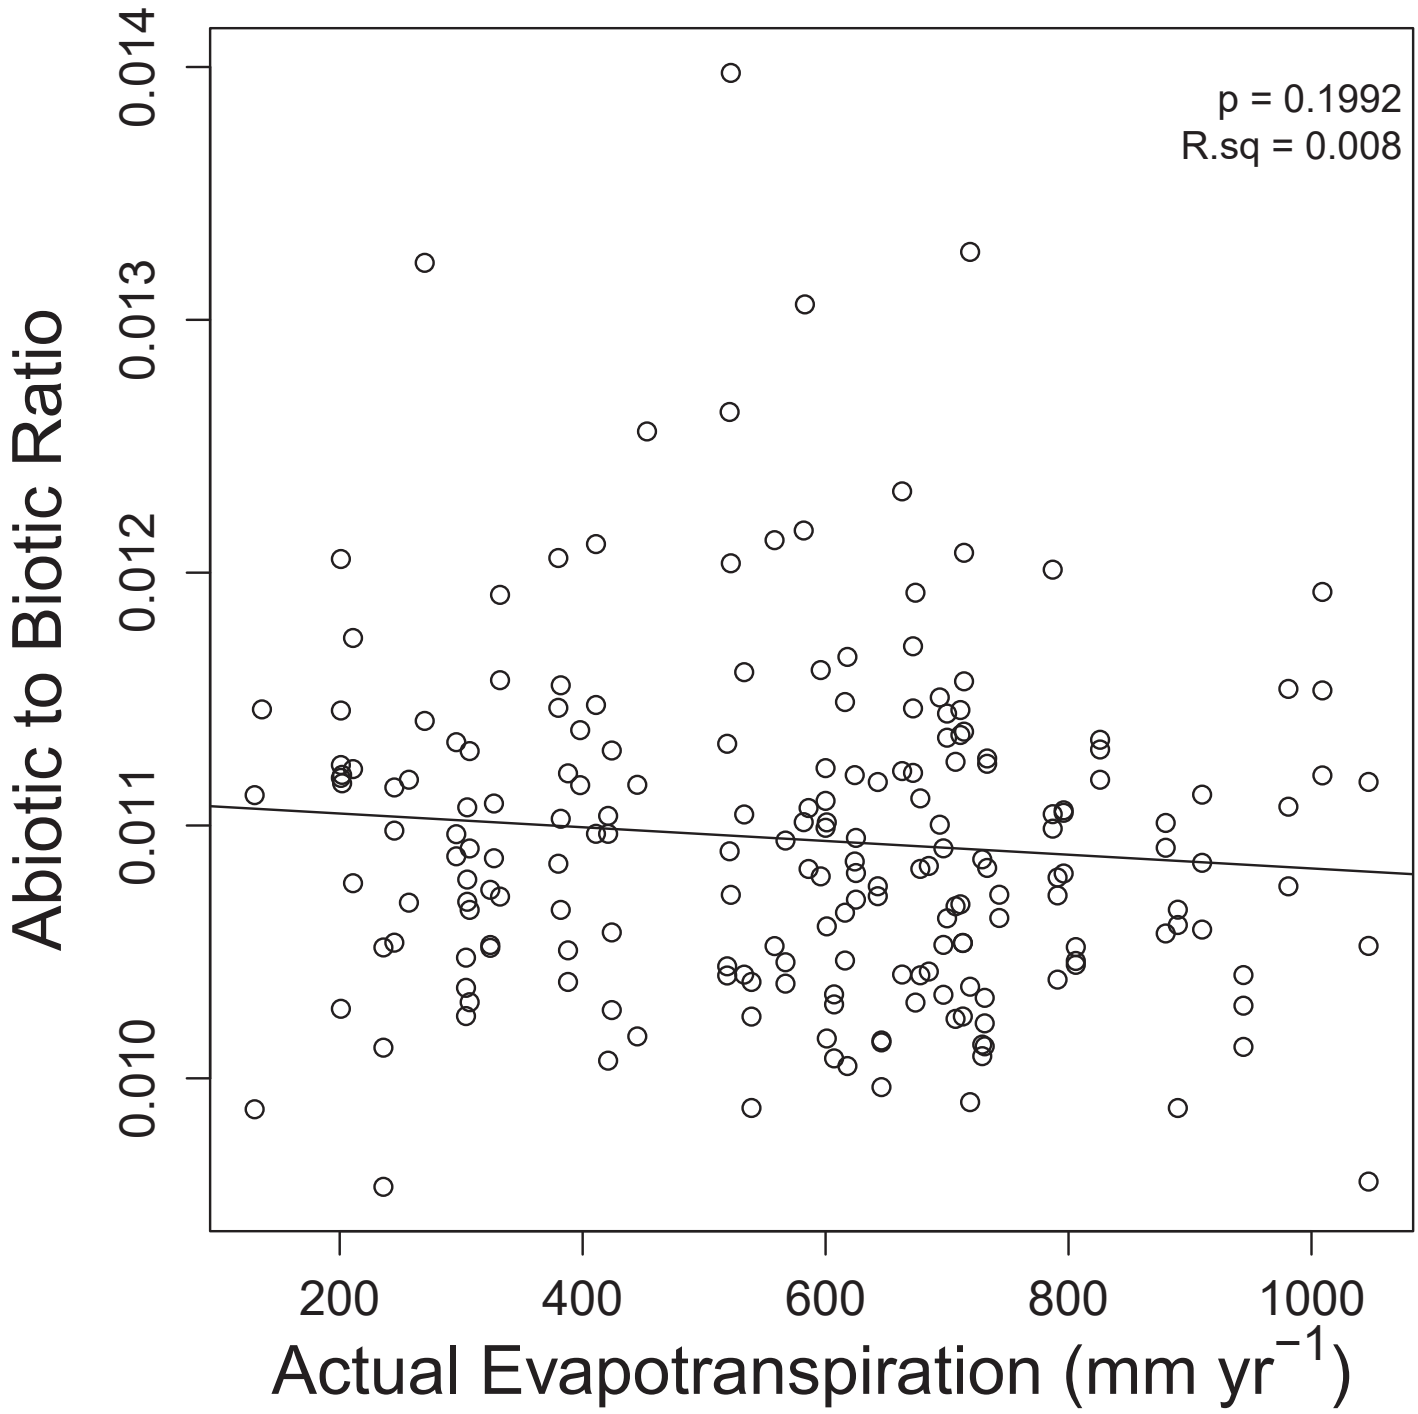

# Surface Water

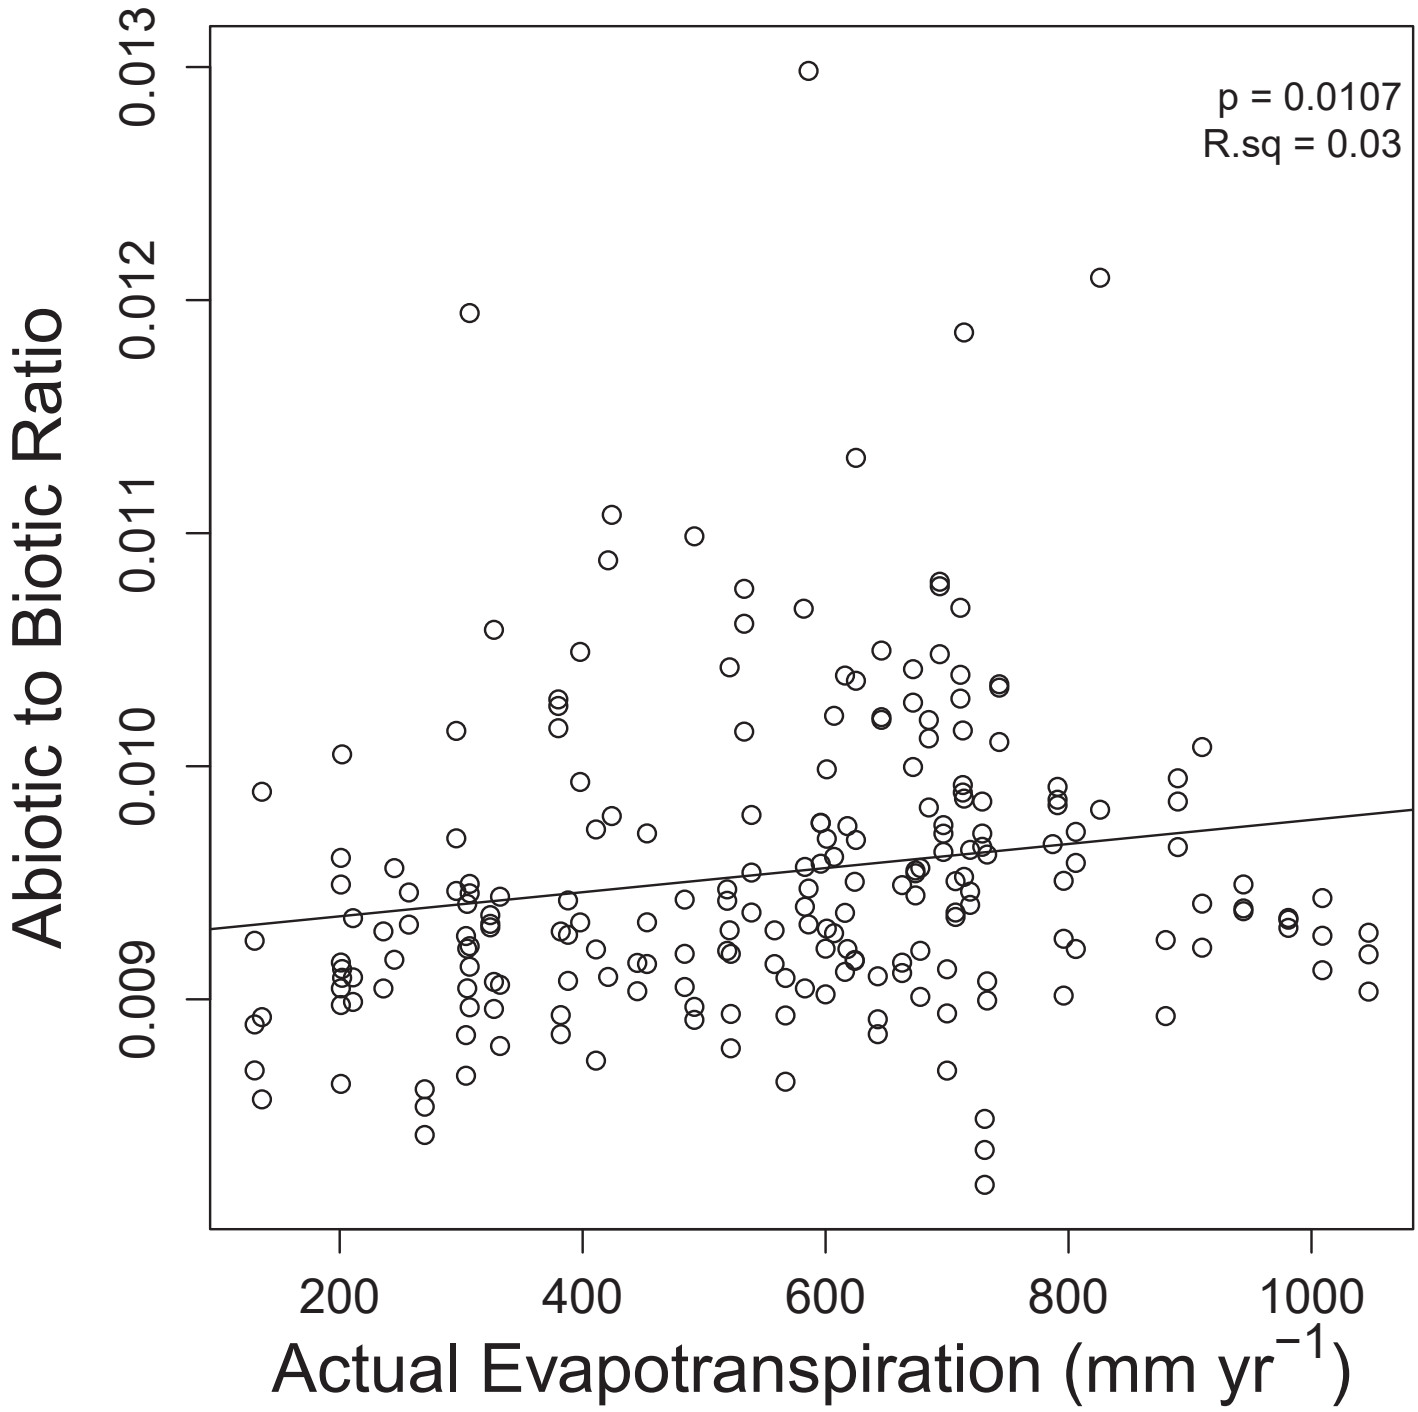

# Sediment

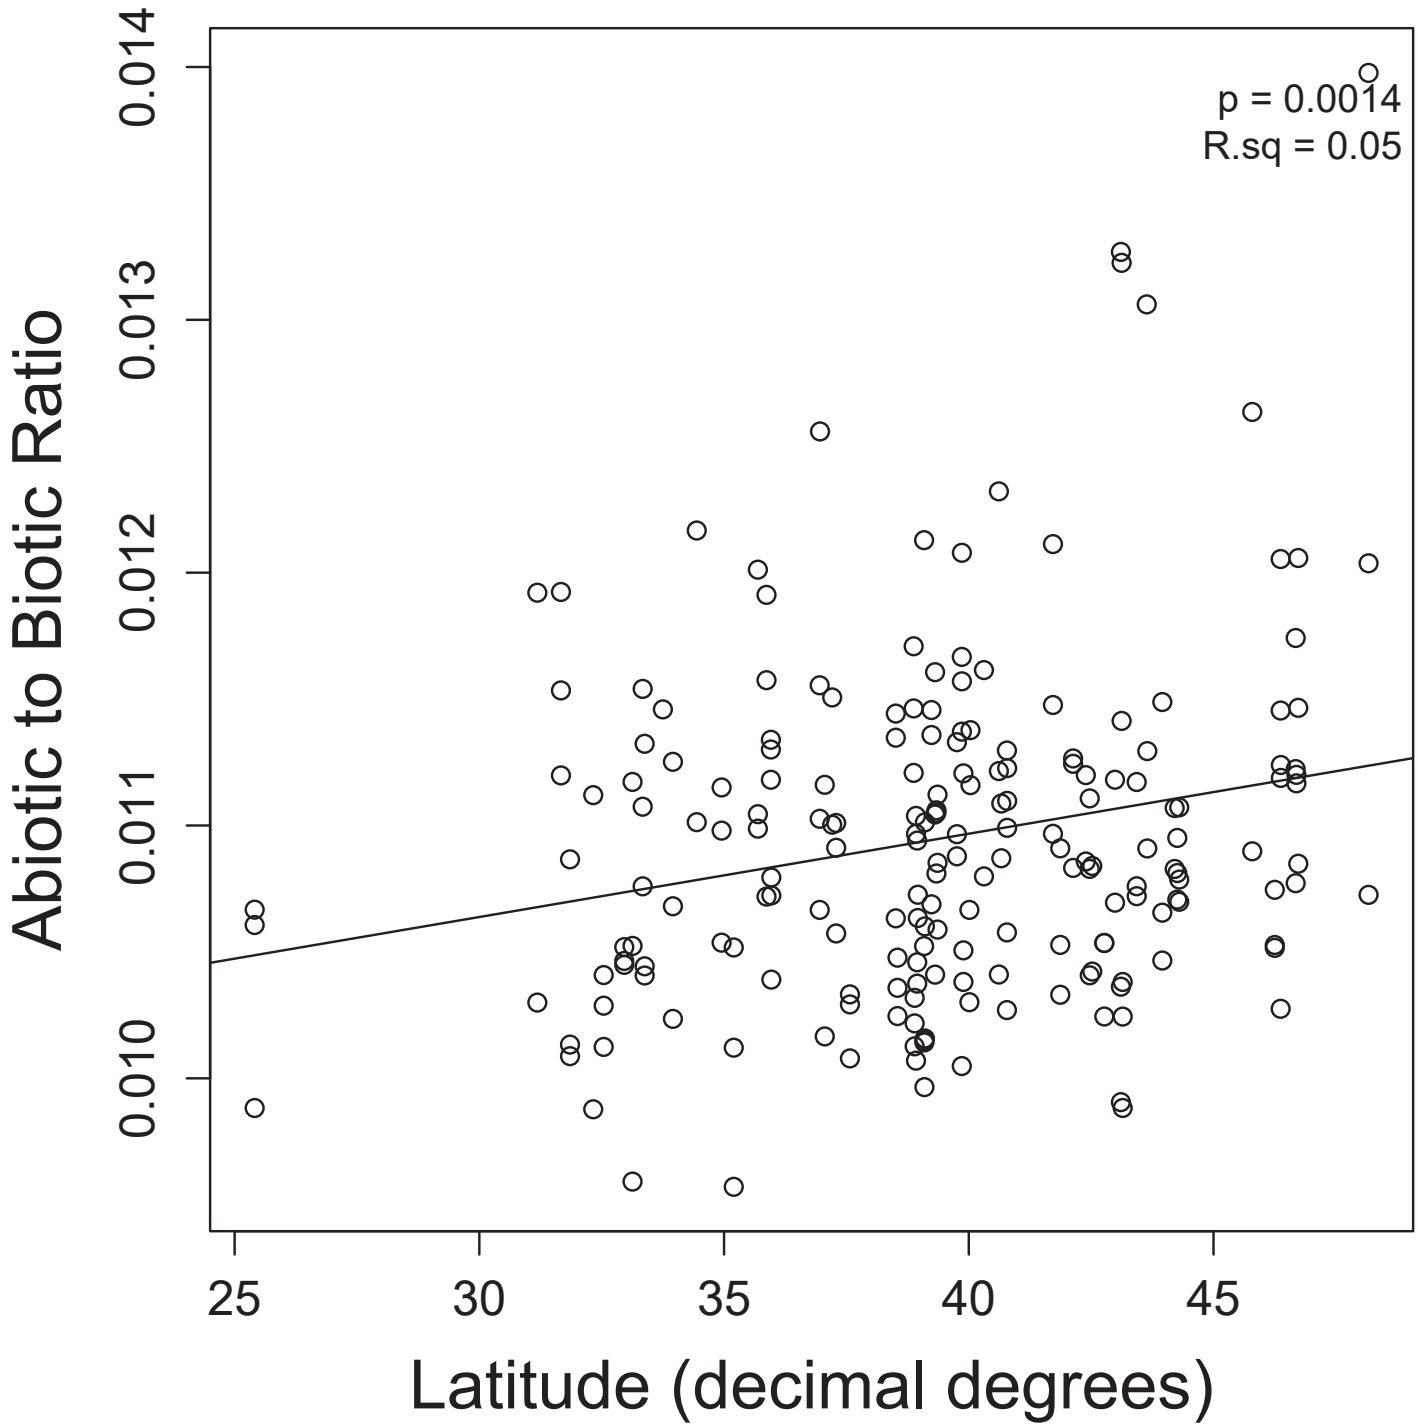

# Surface Water

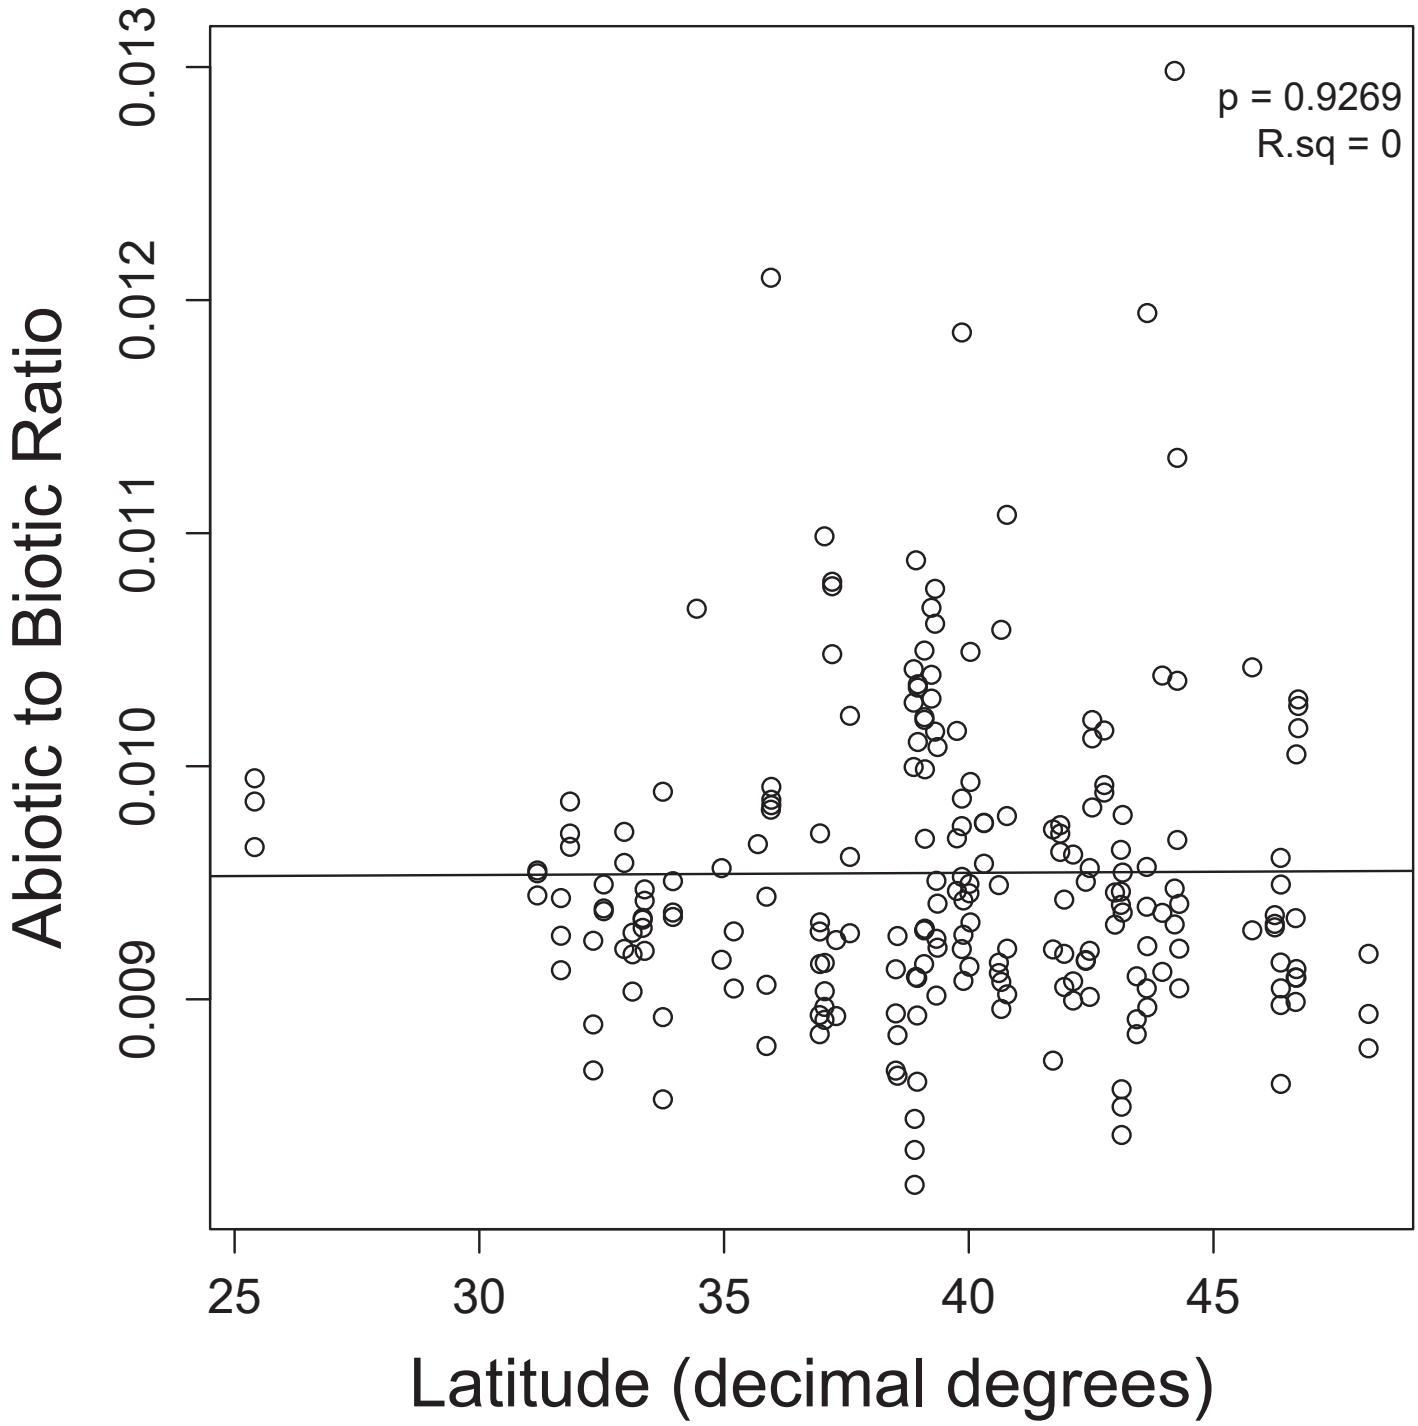

# Sediment

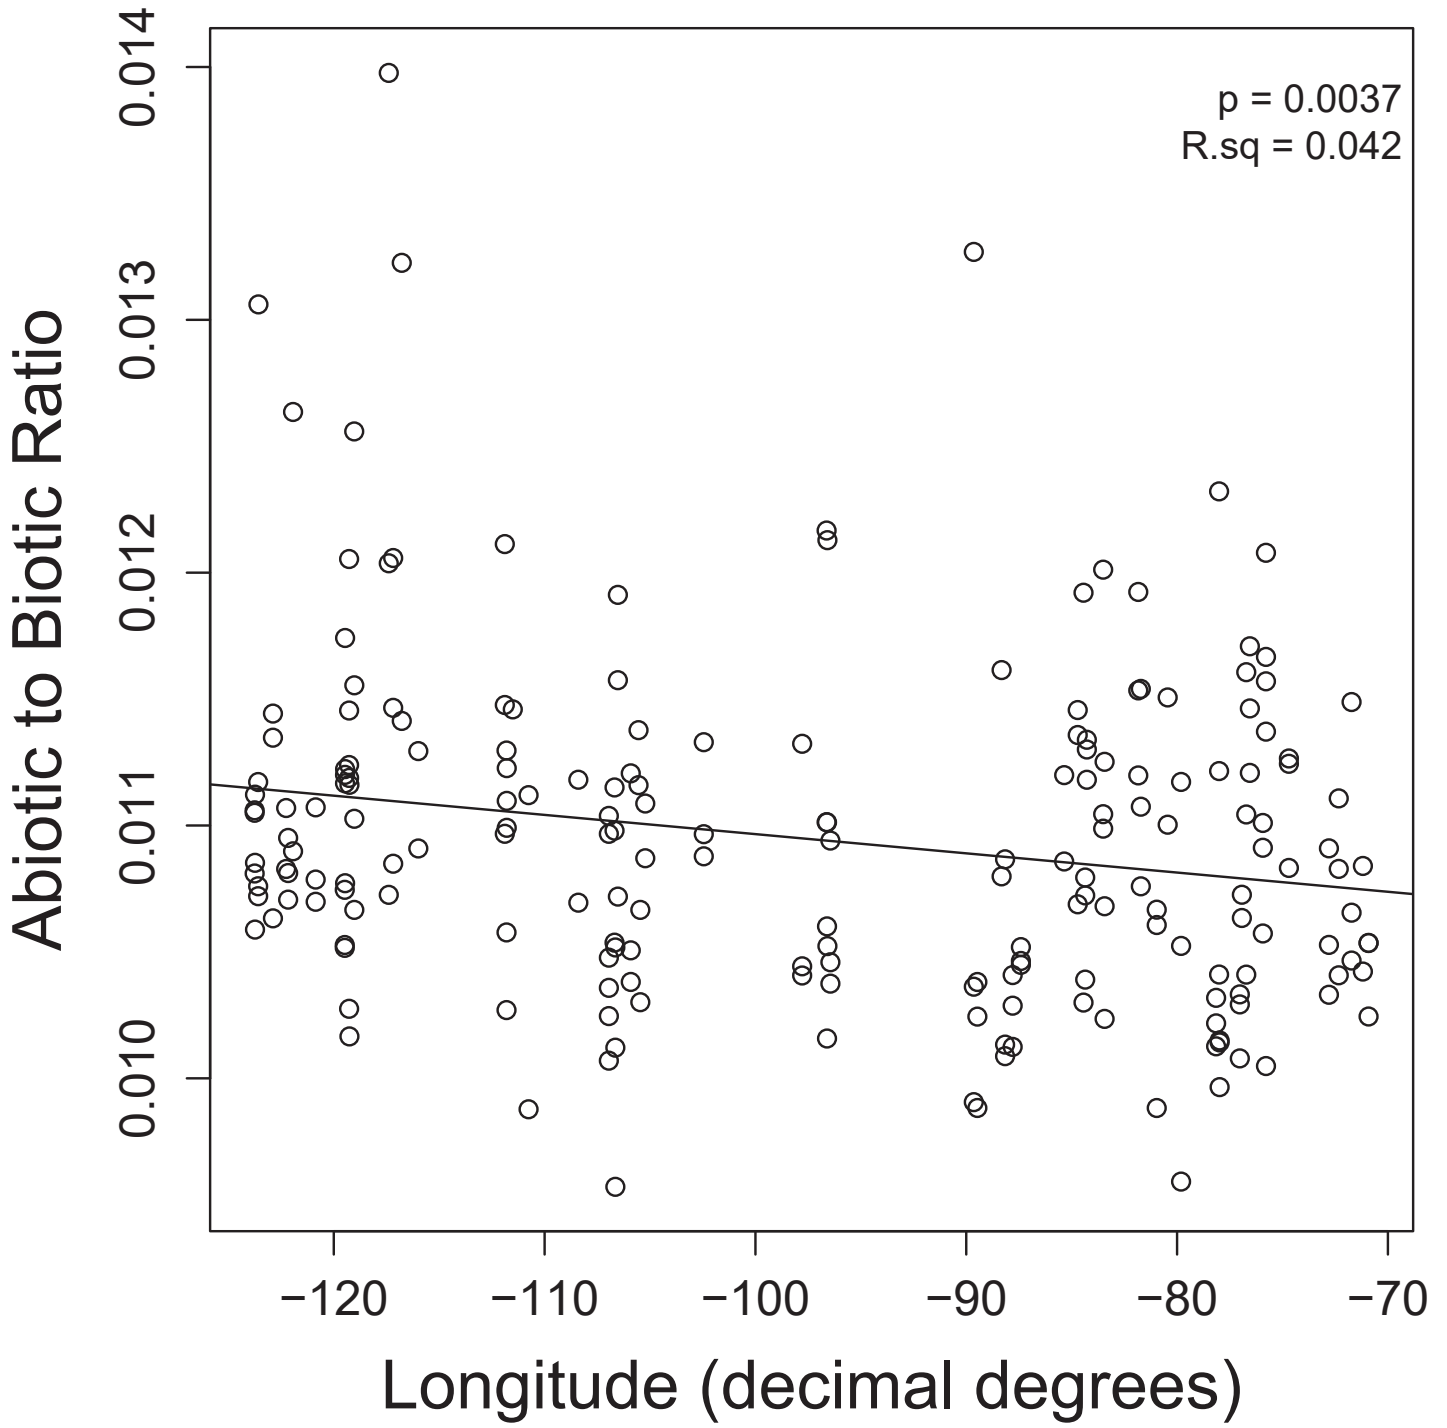

# Surface Water

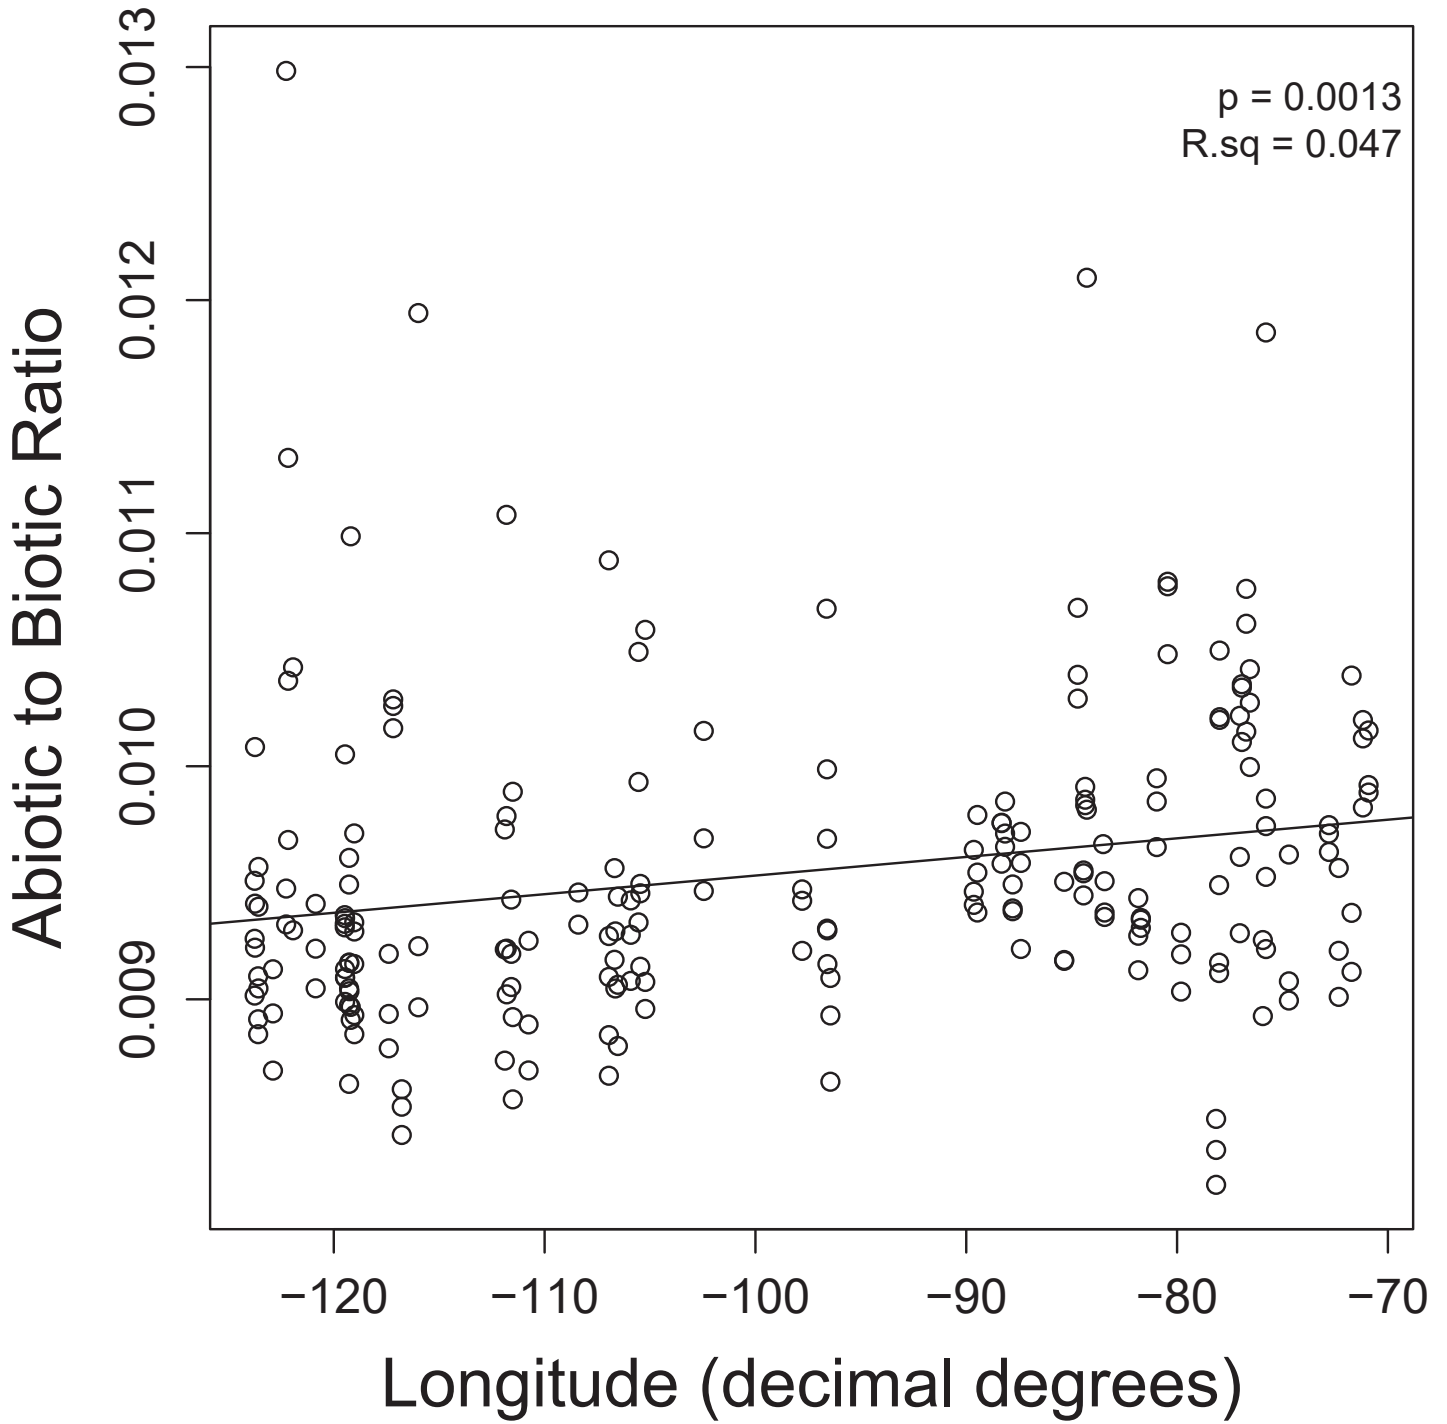

# Sediment

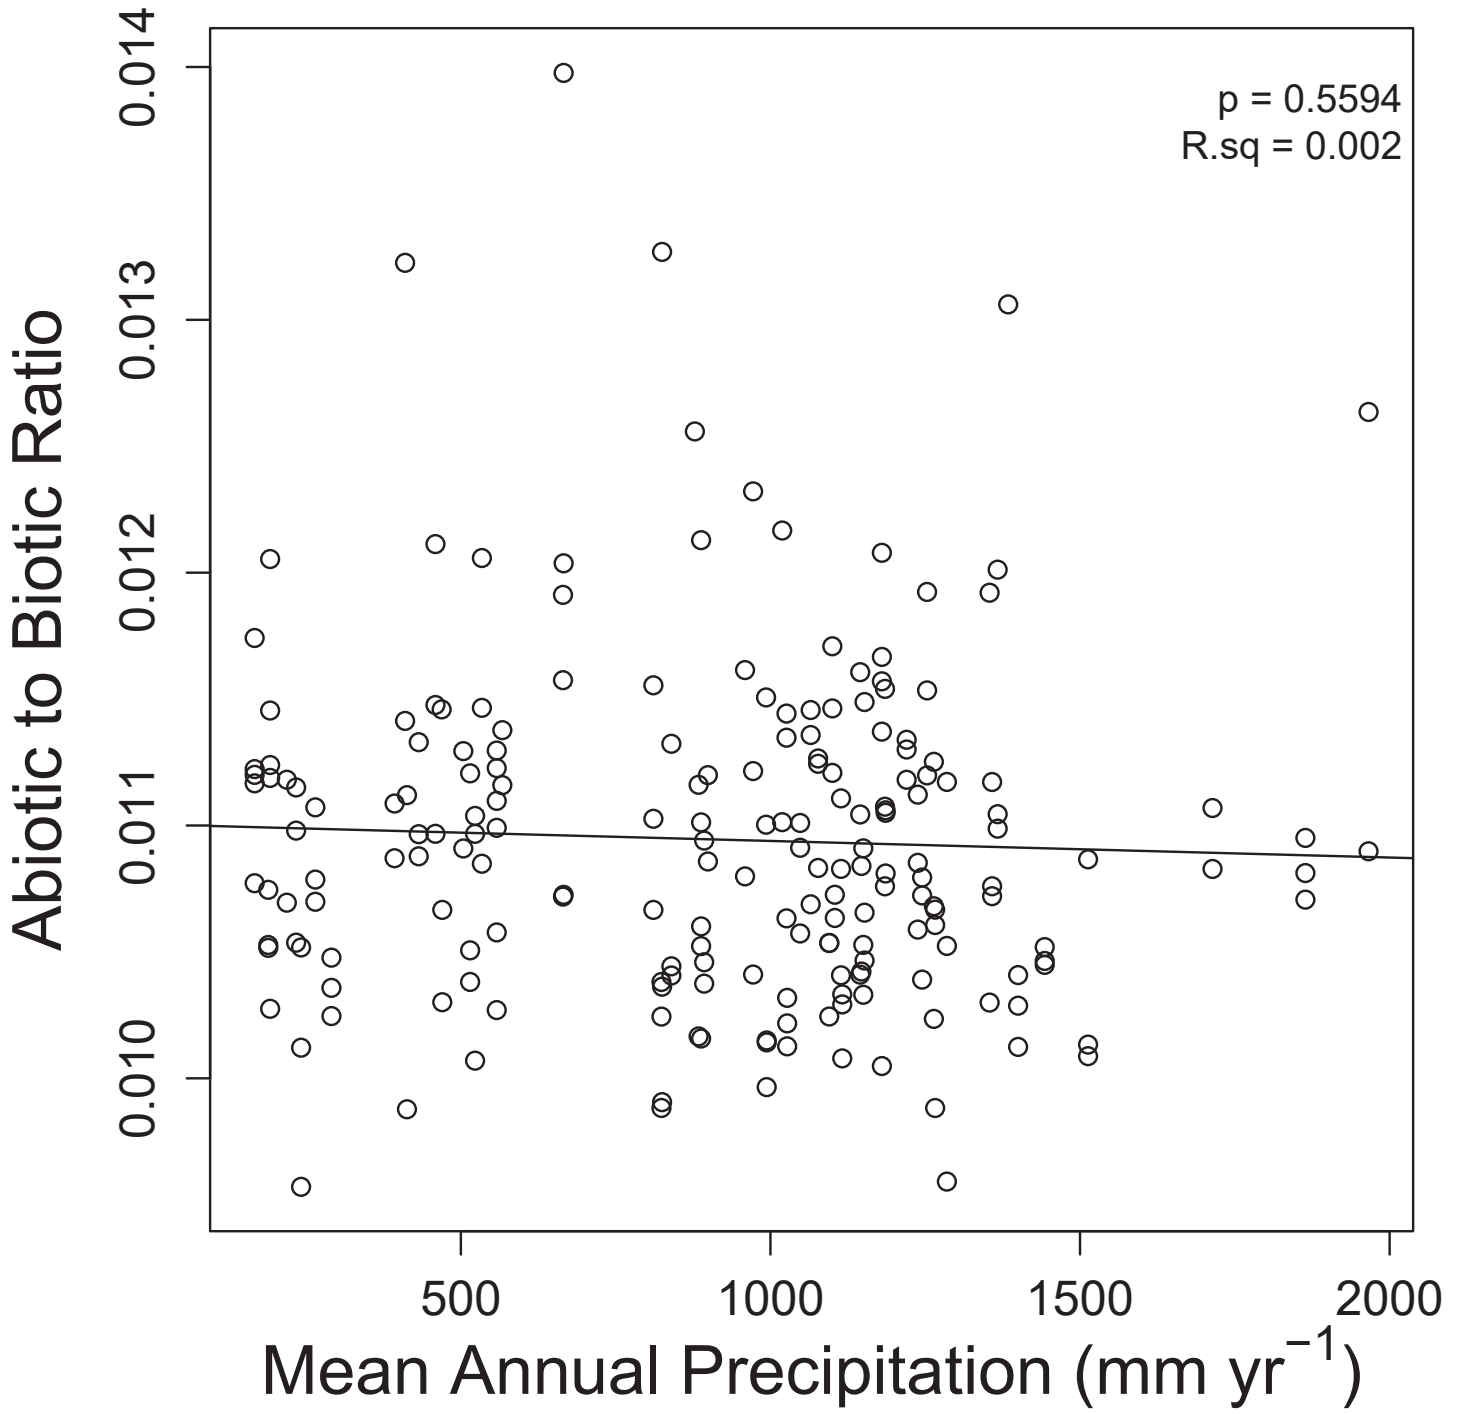

# Surface Water

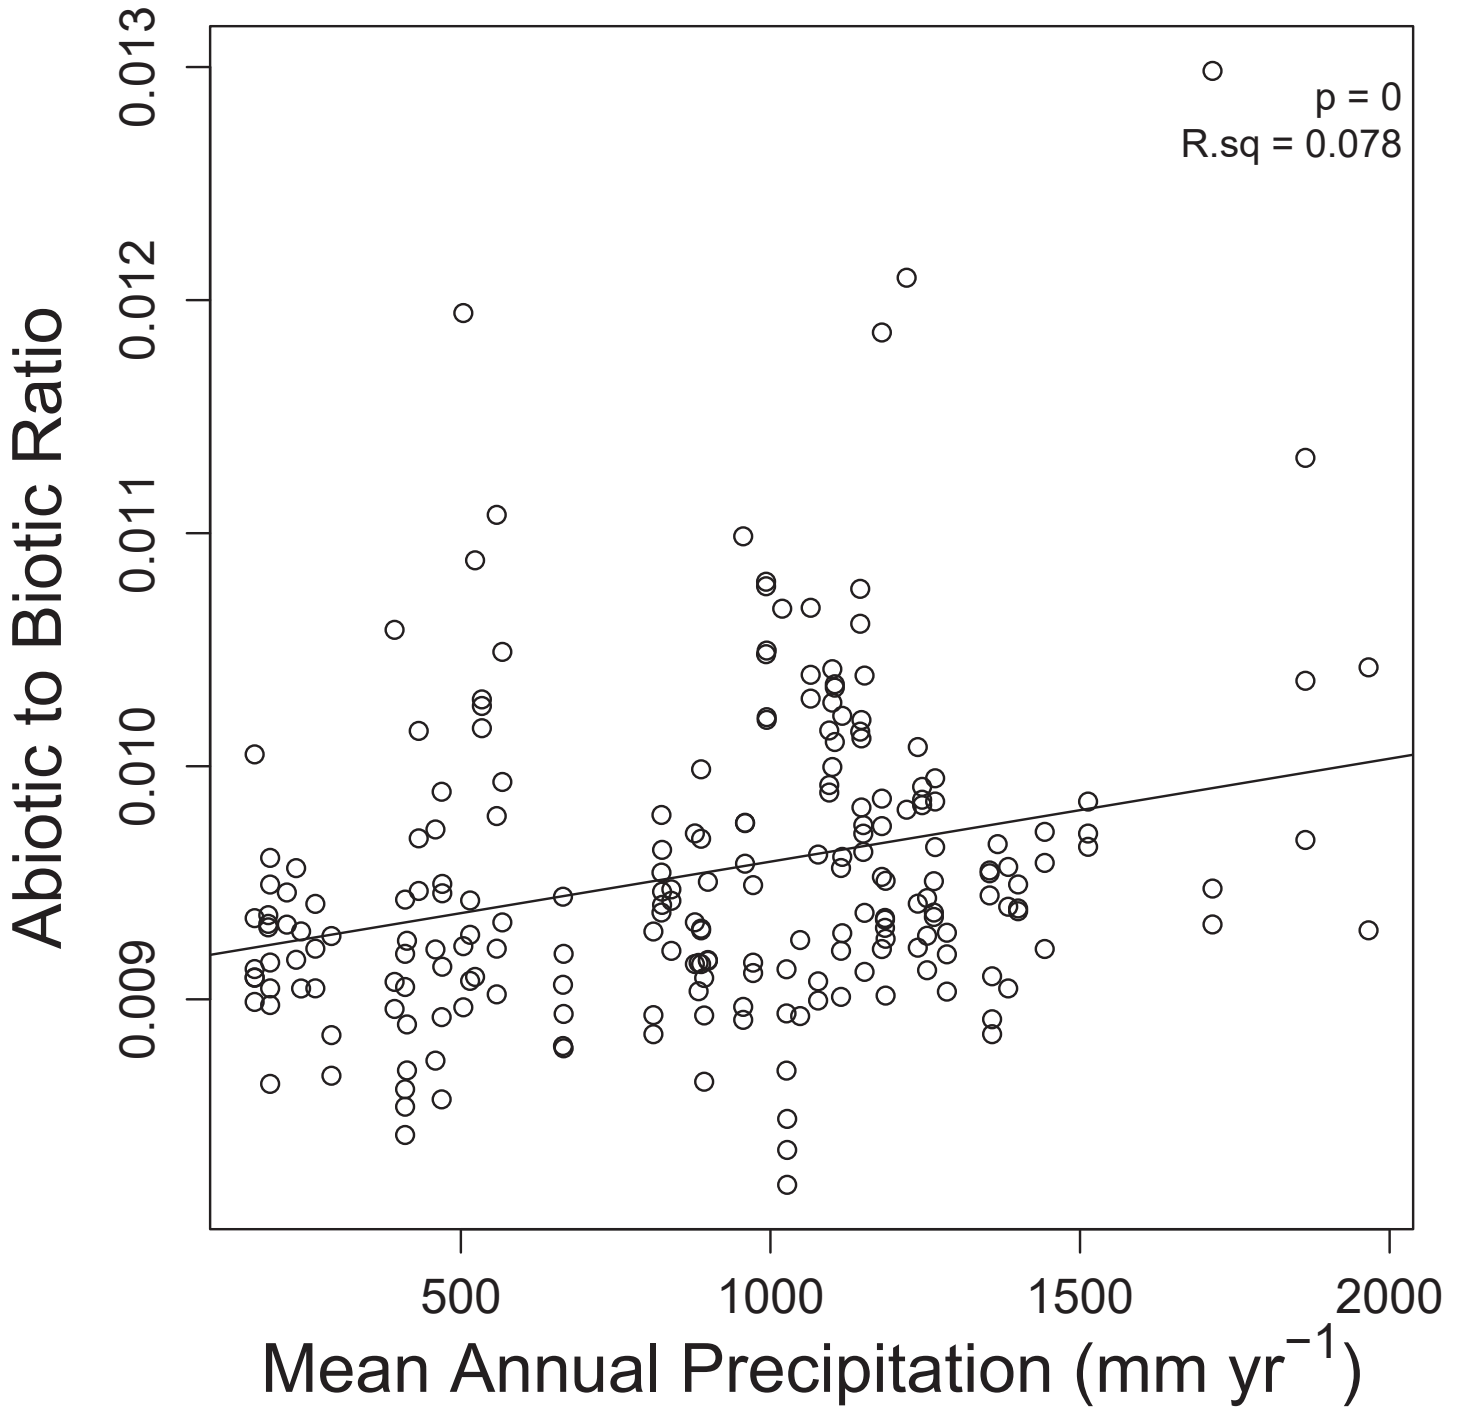



# Sediment

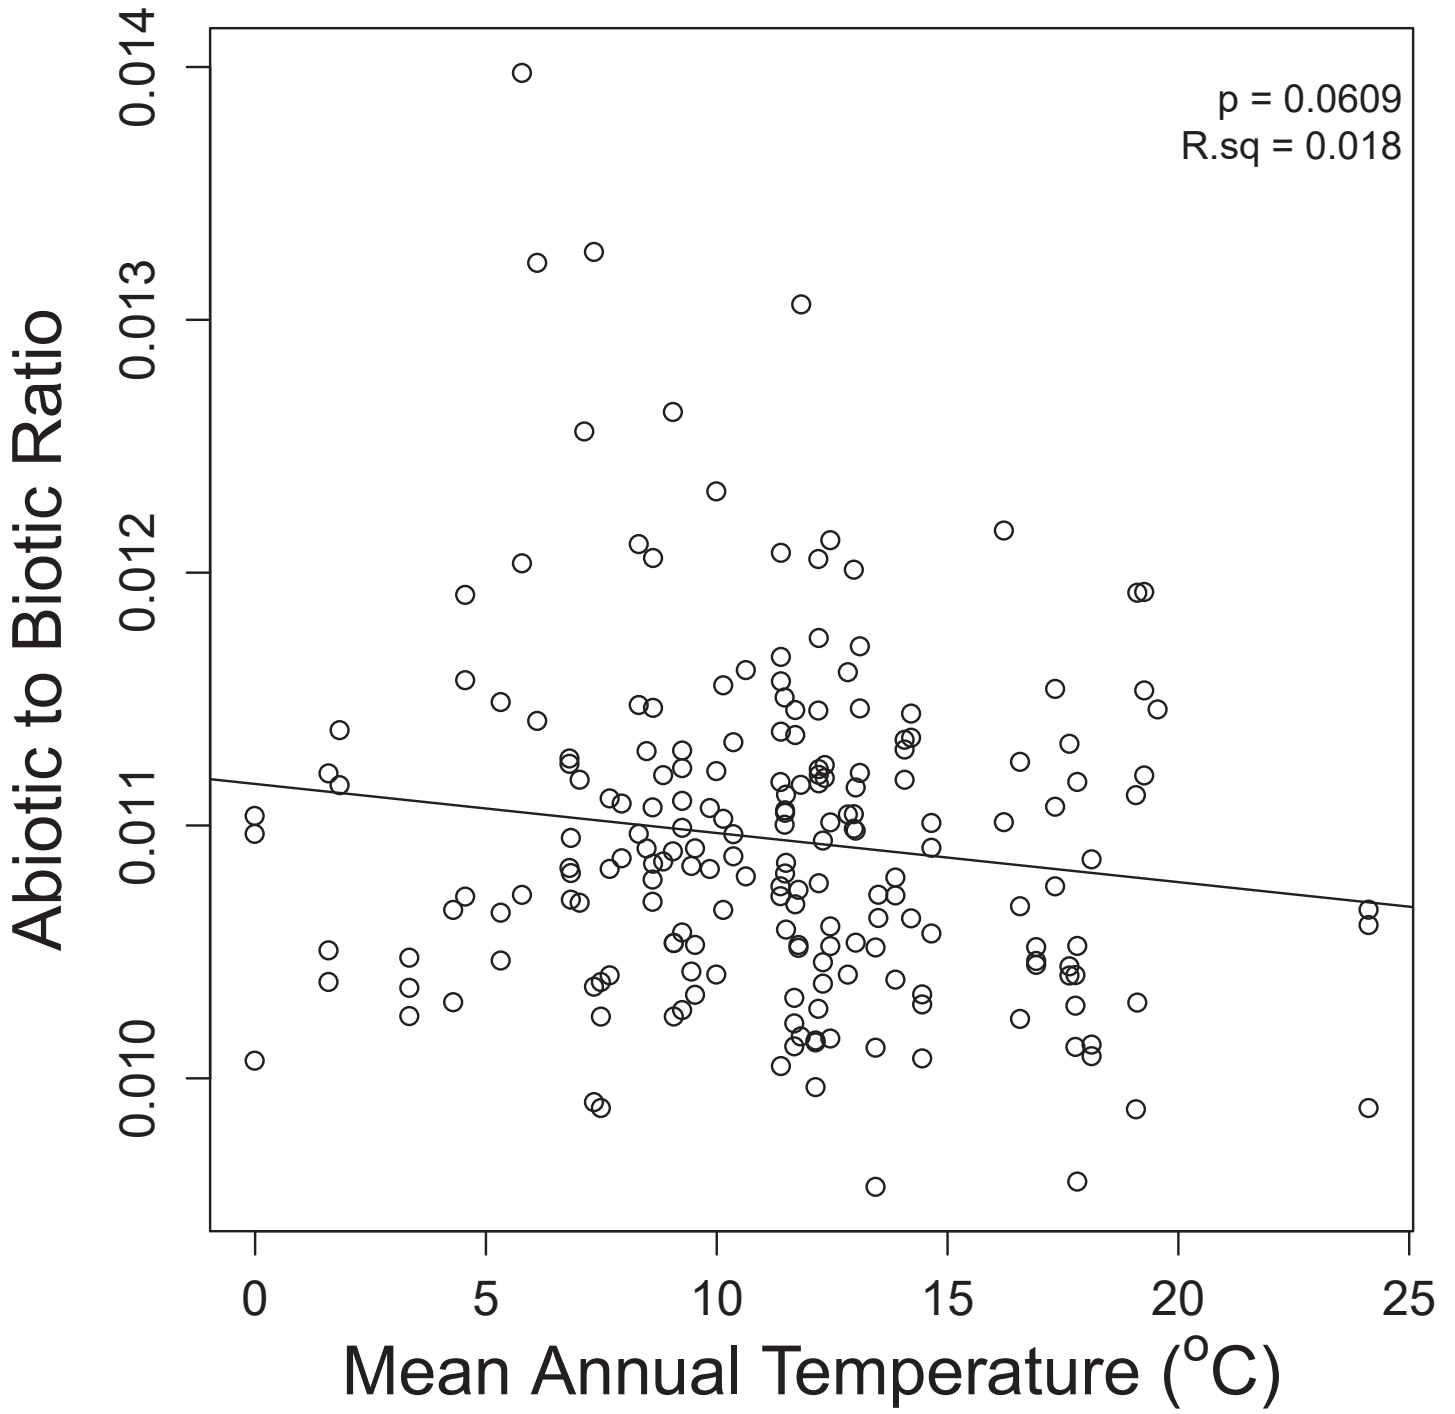

### Surface Water

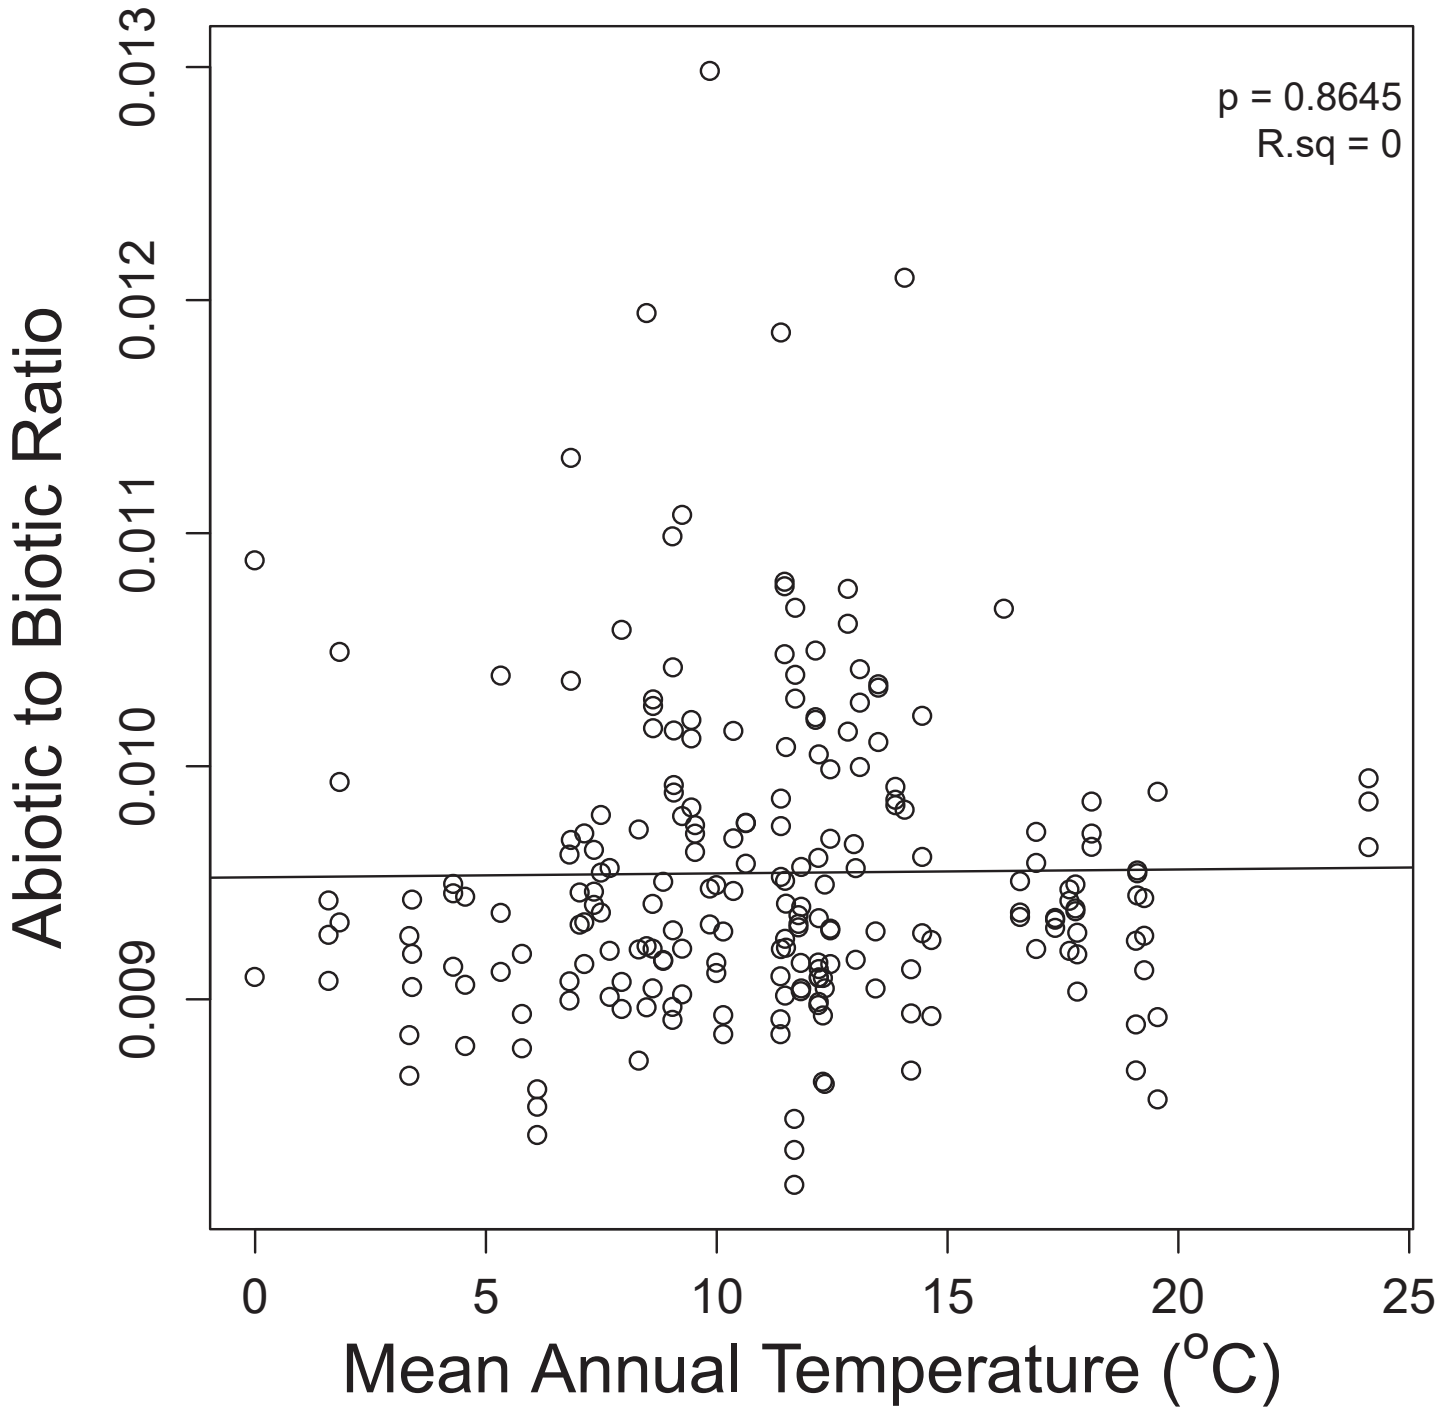

# Sediment

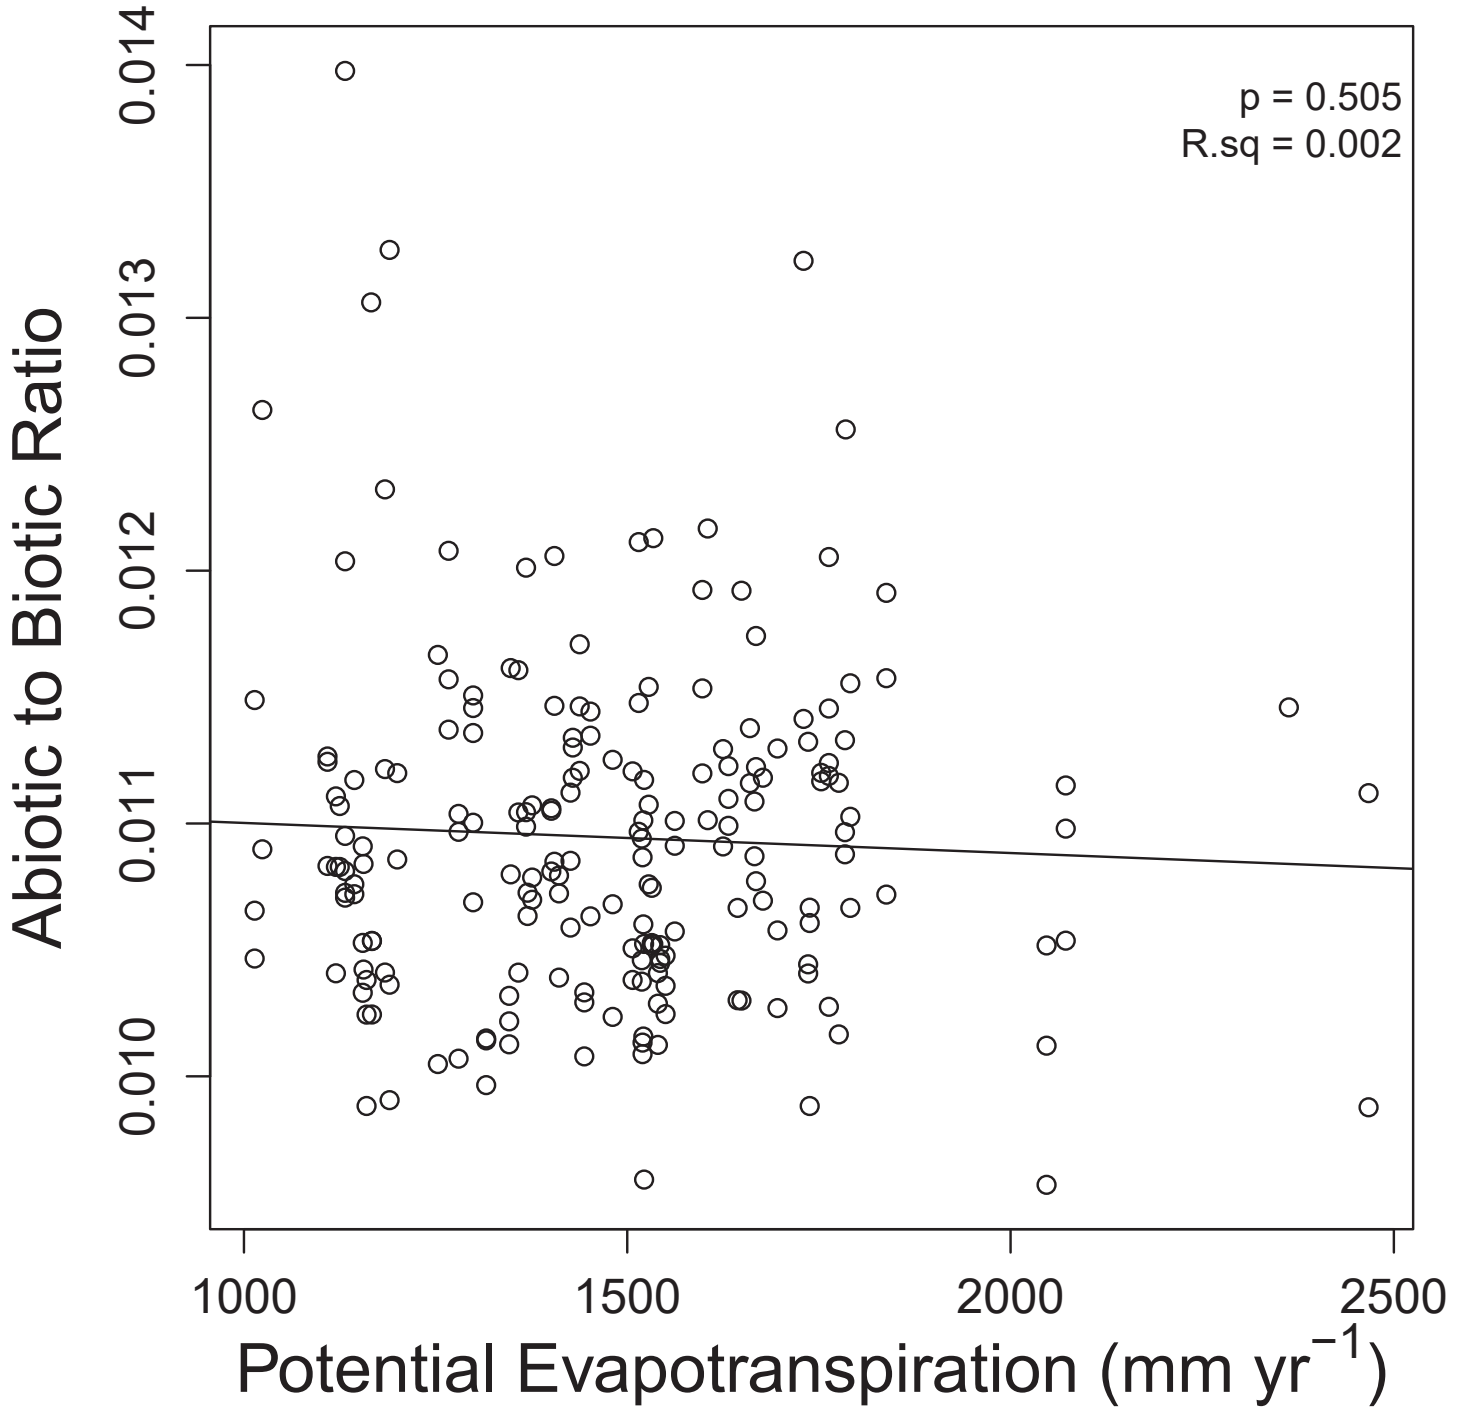

# Surface Water

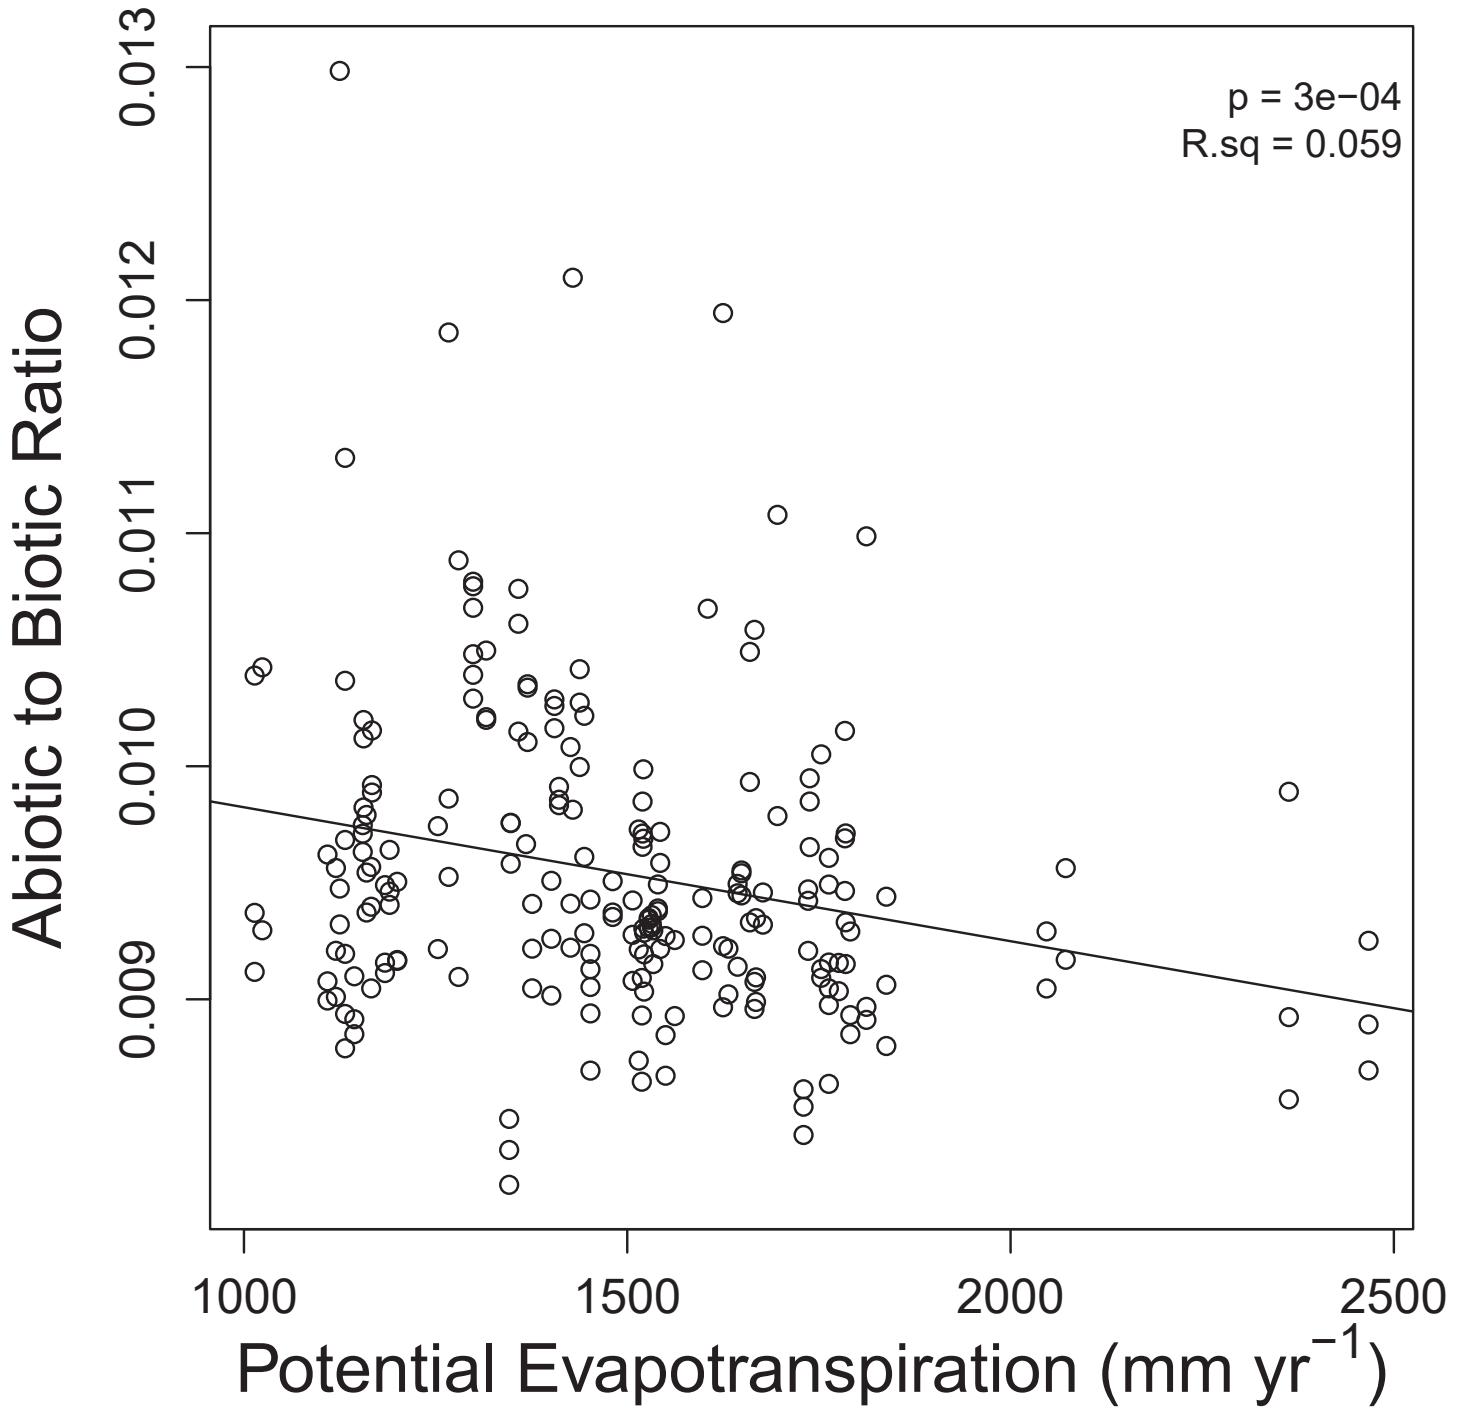

# Sediment

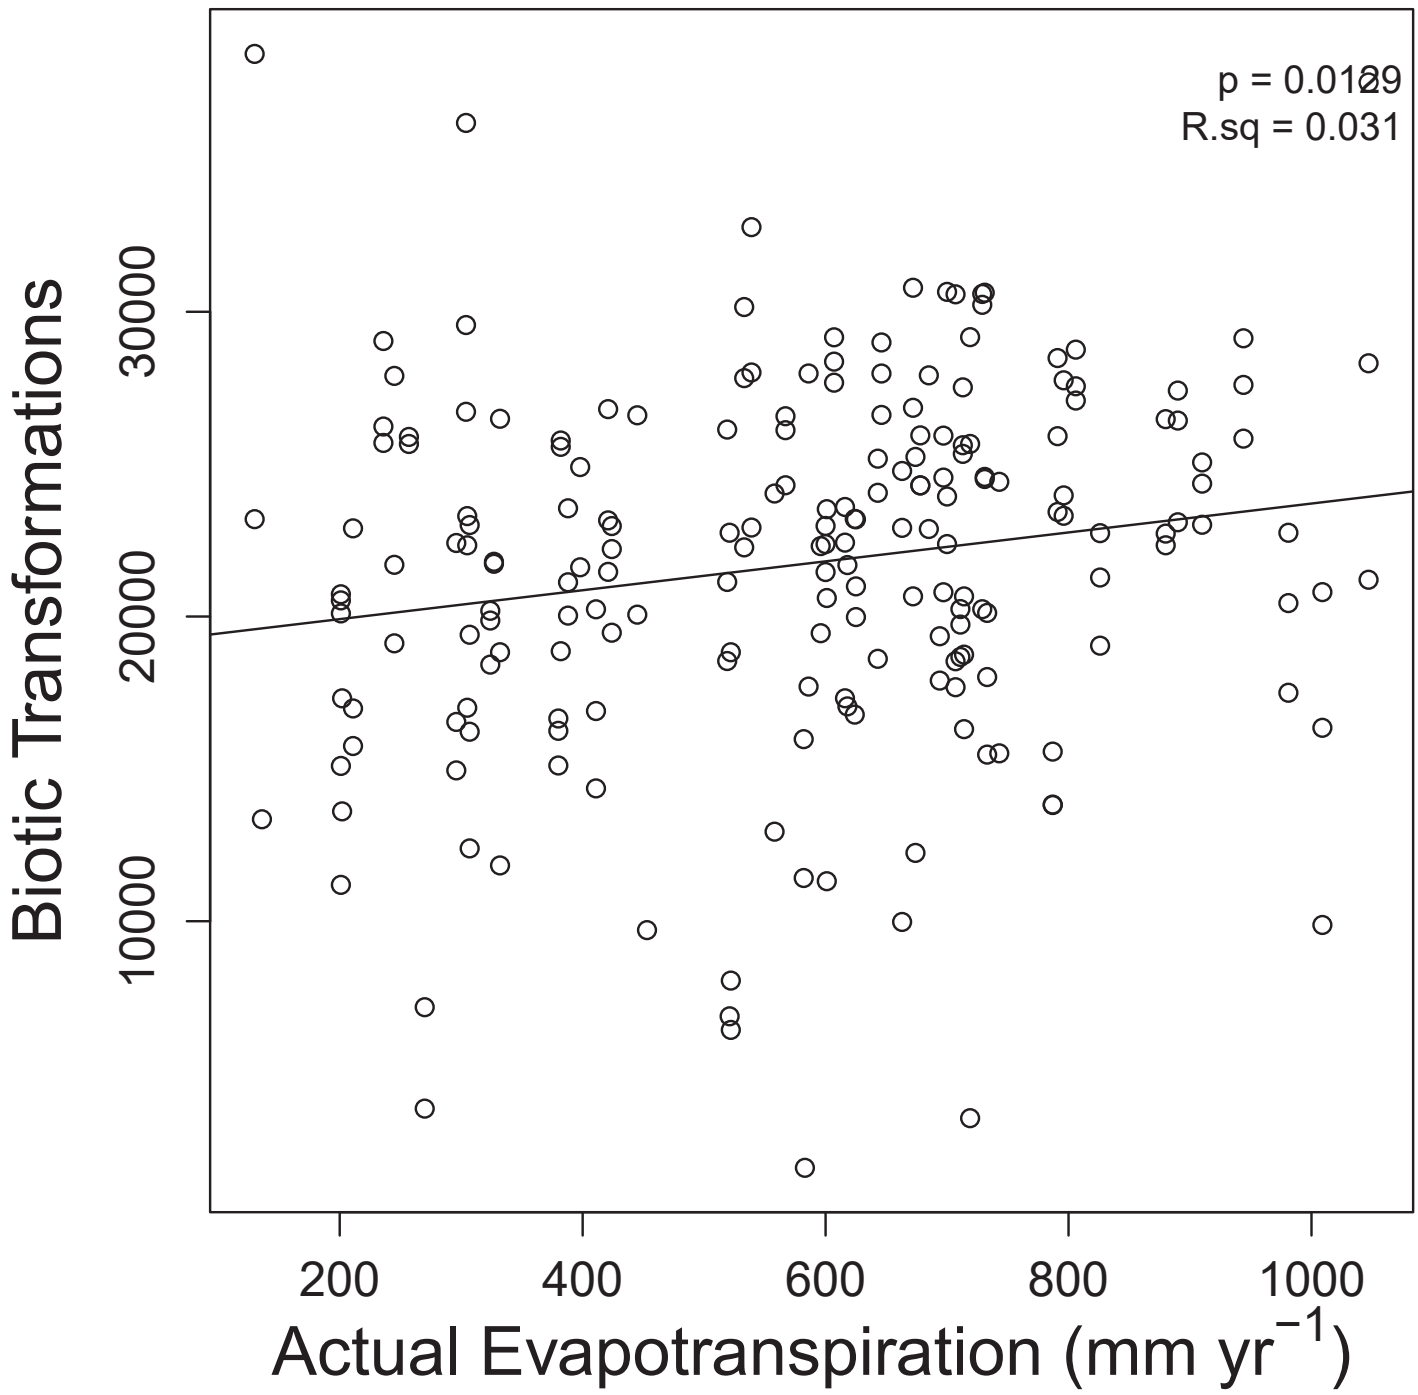

# Surface Water

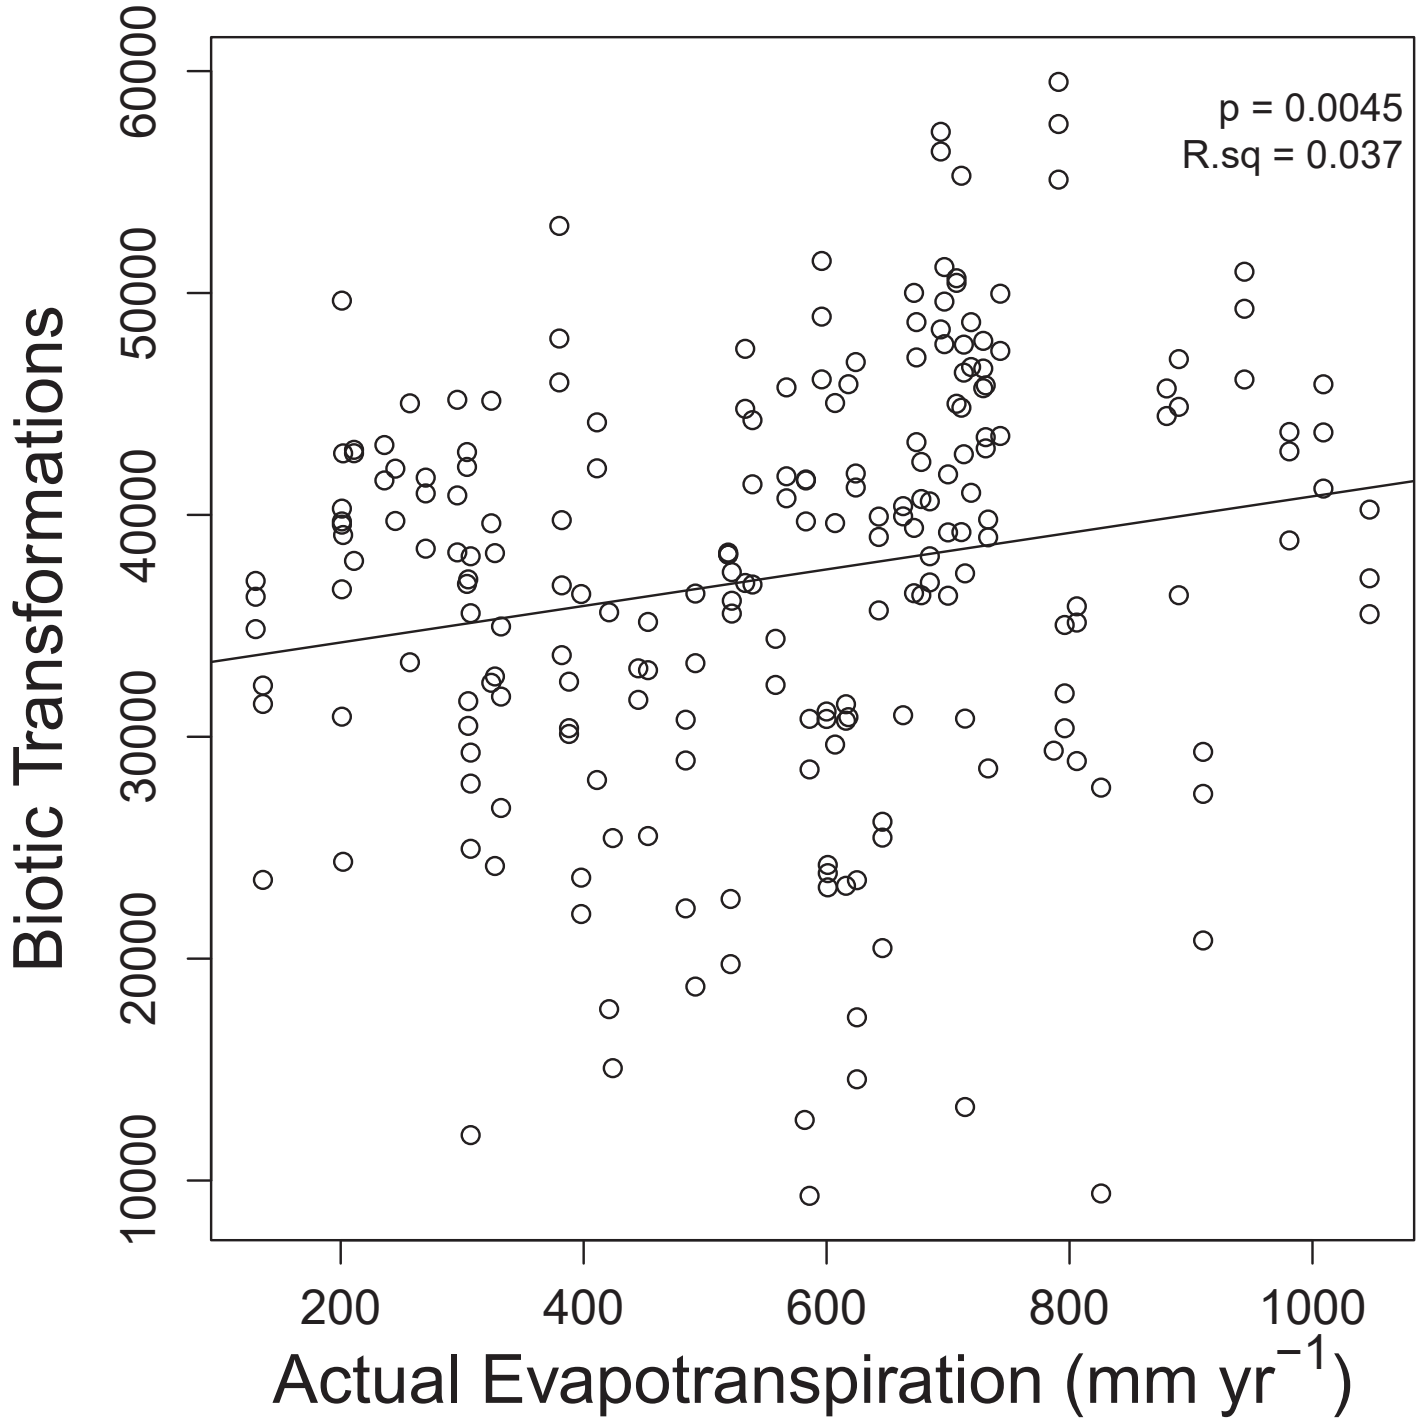

# Sediment

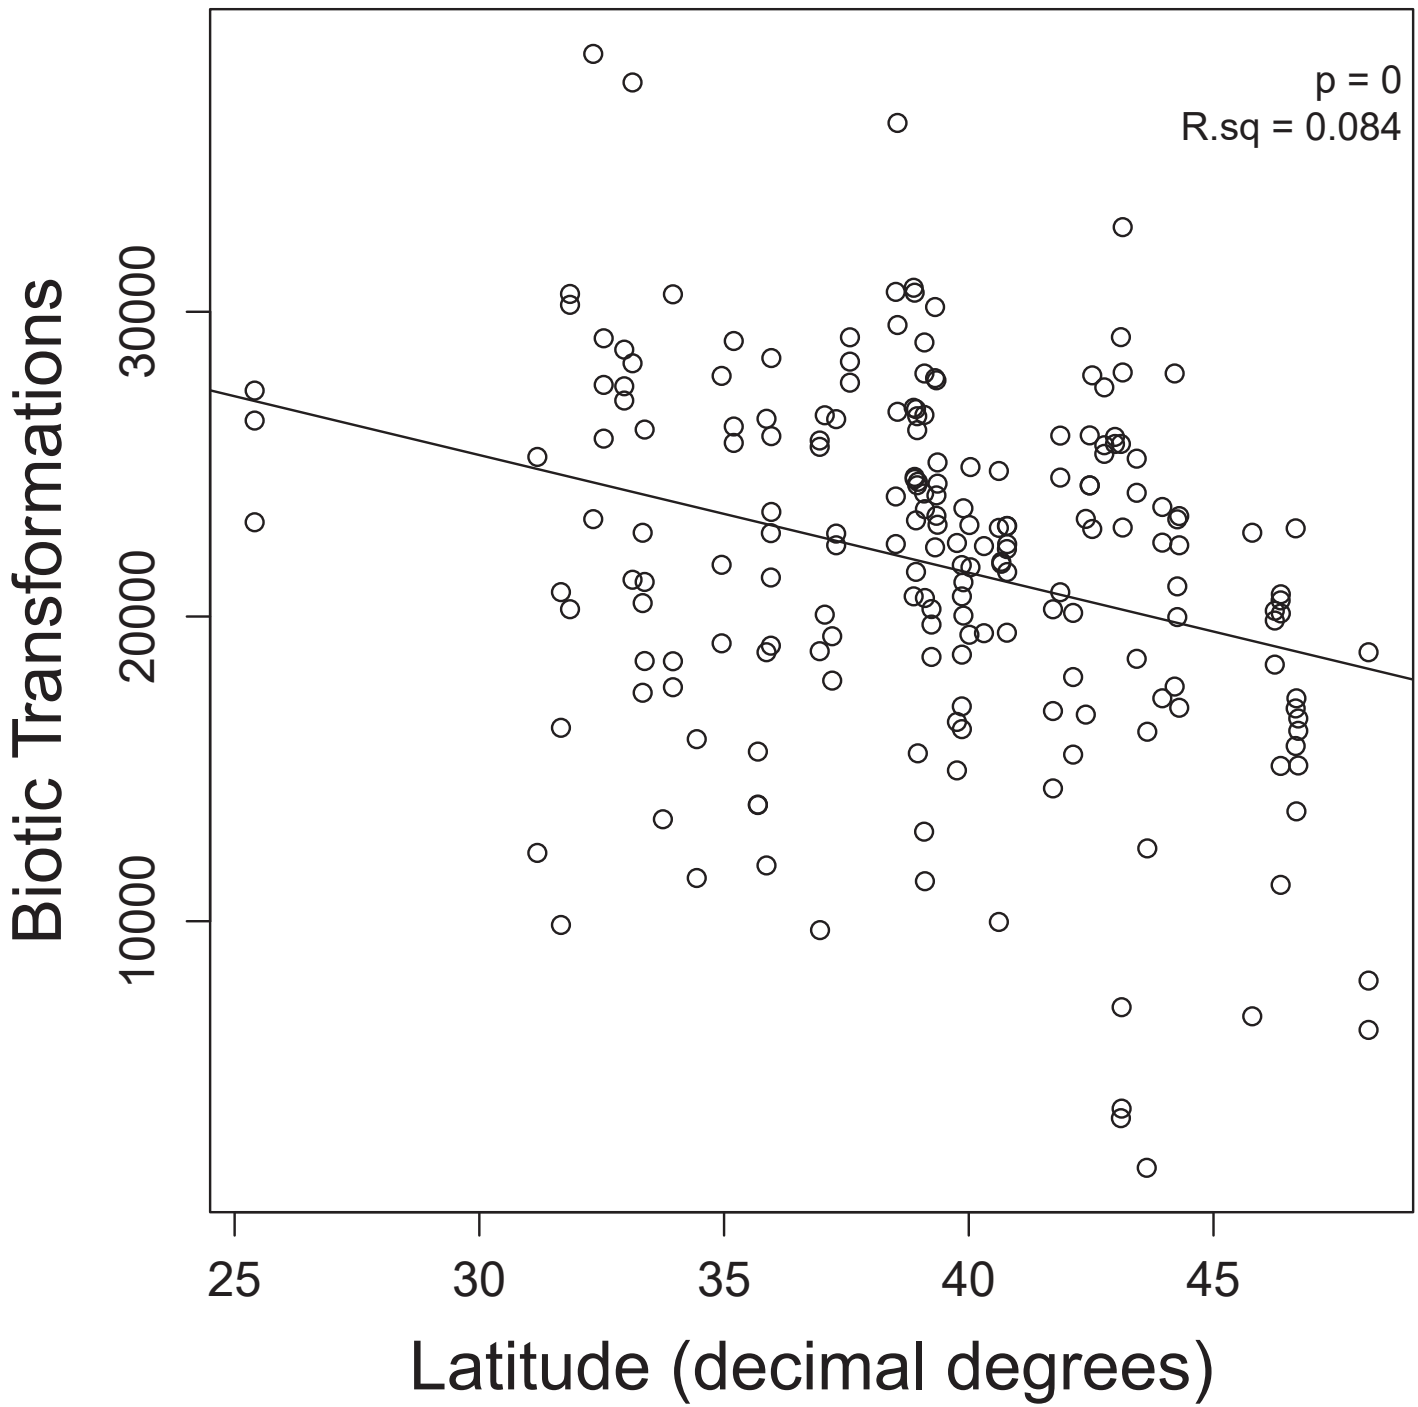

# Surface Water

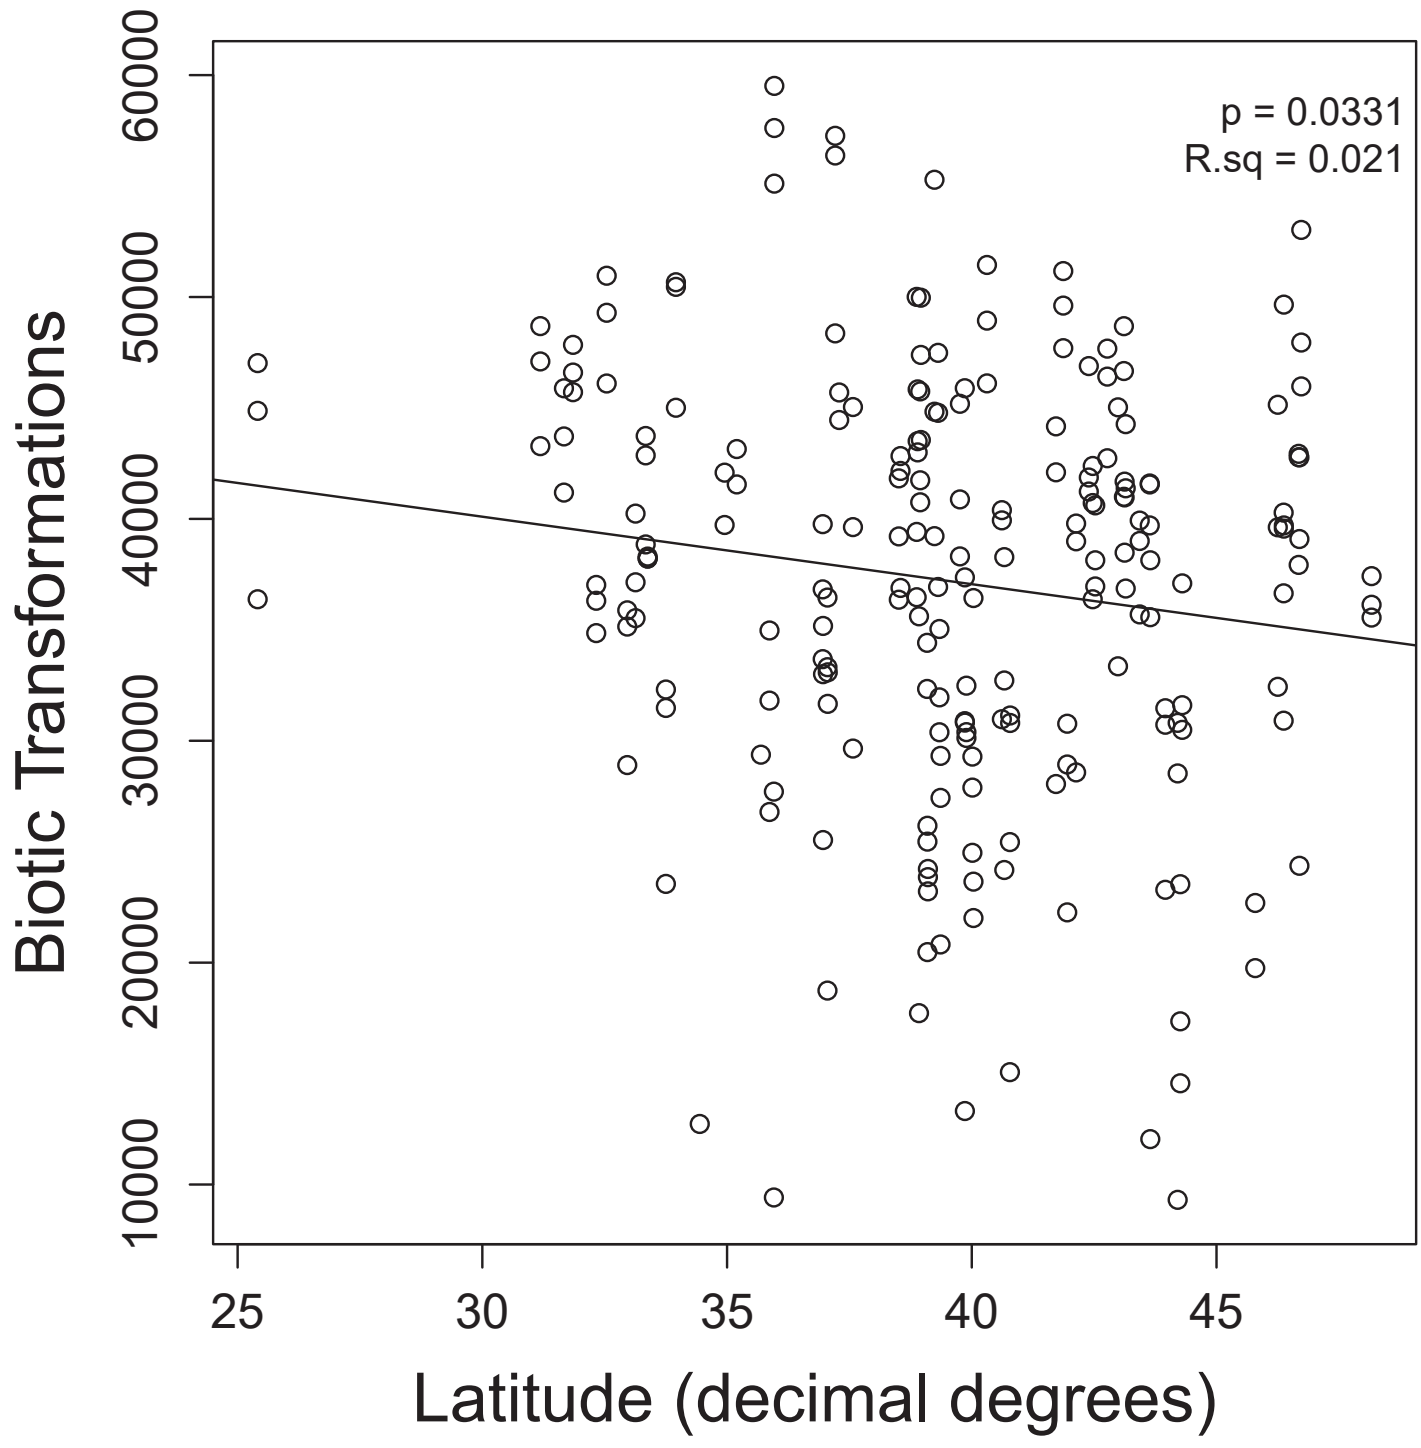



# Sediment

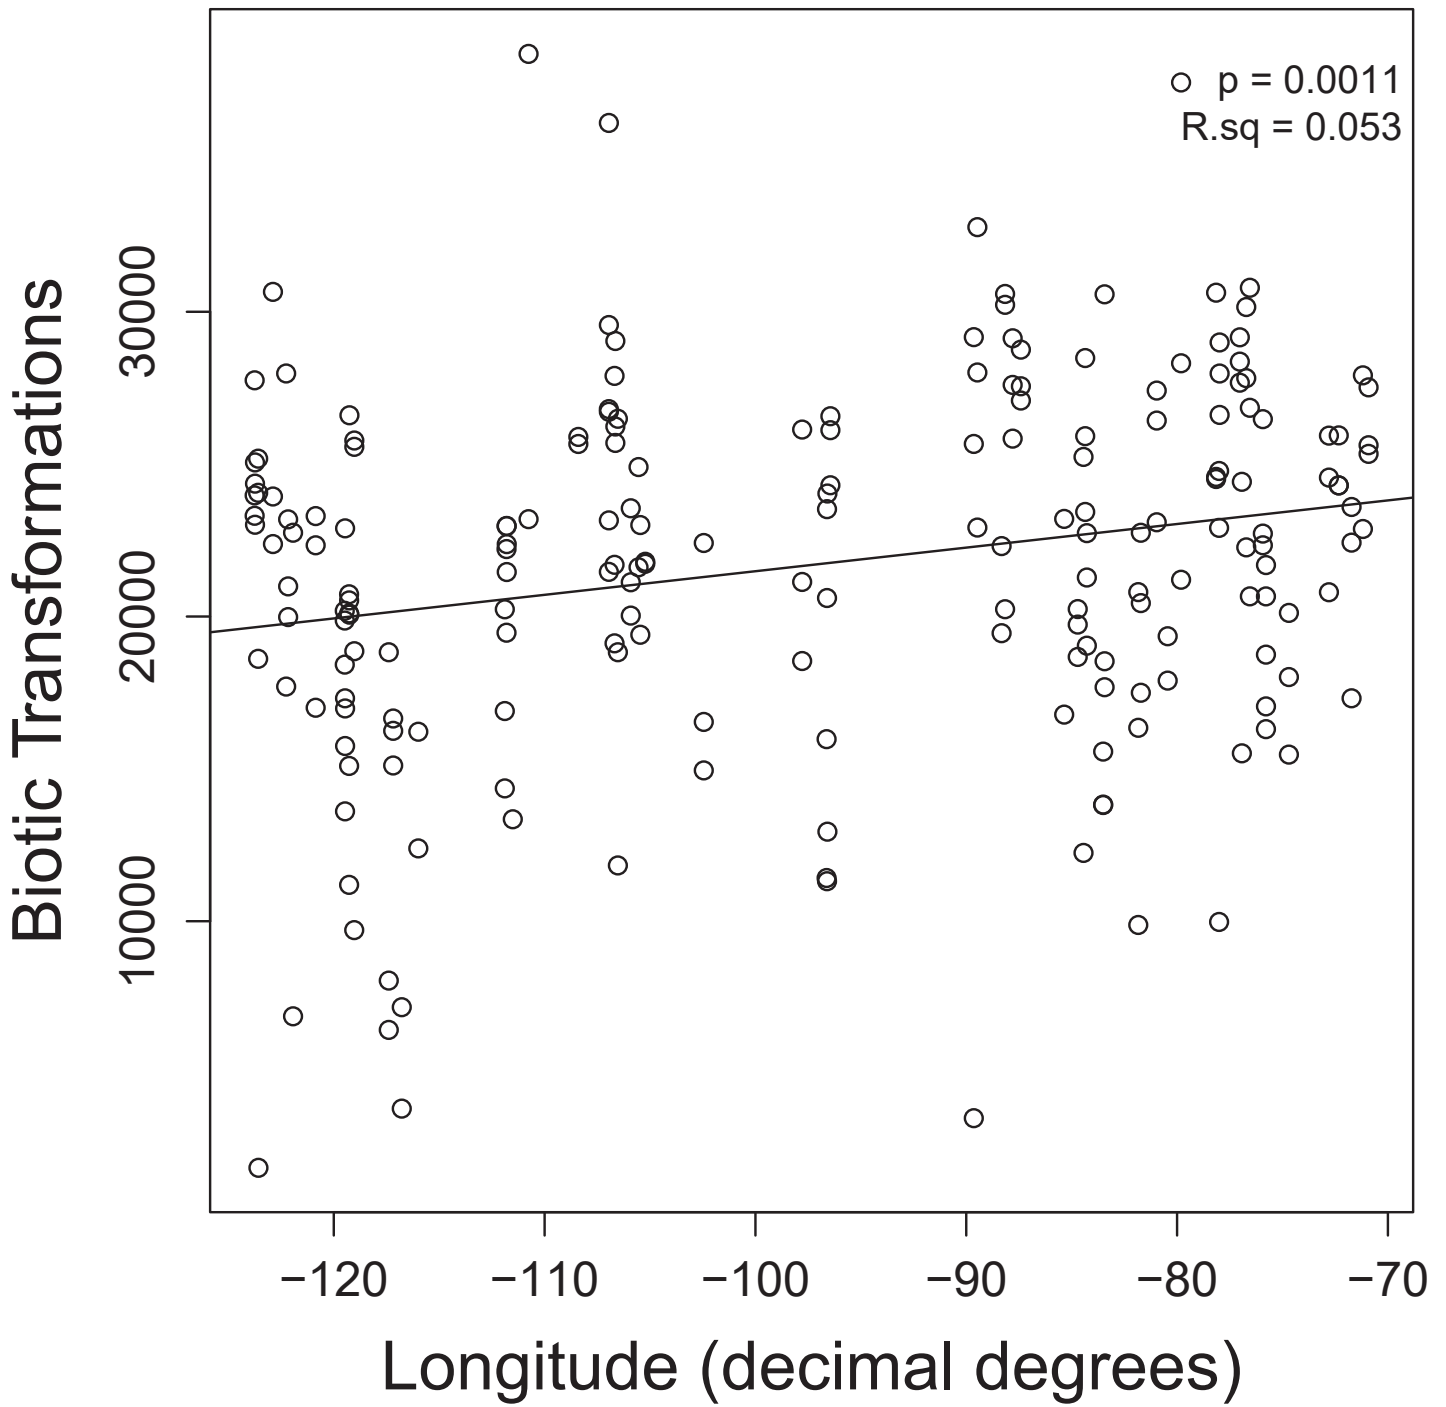

# Surface Water

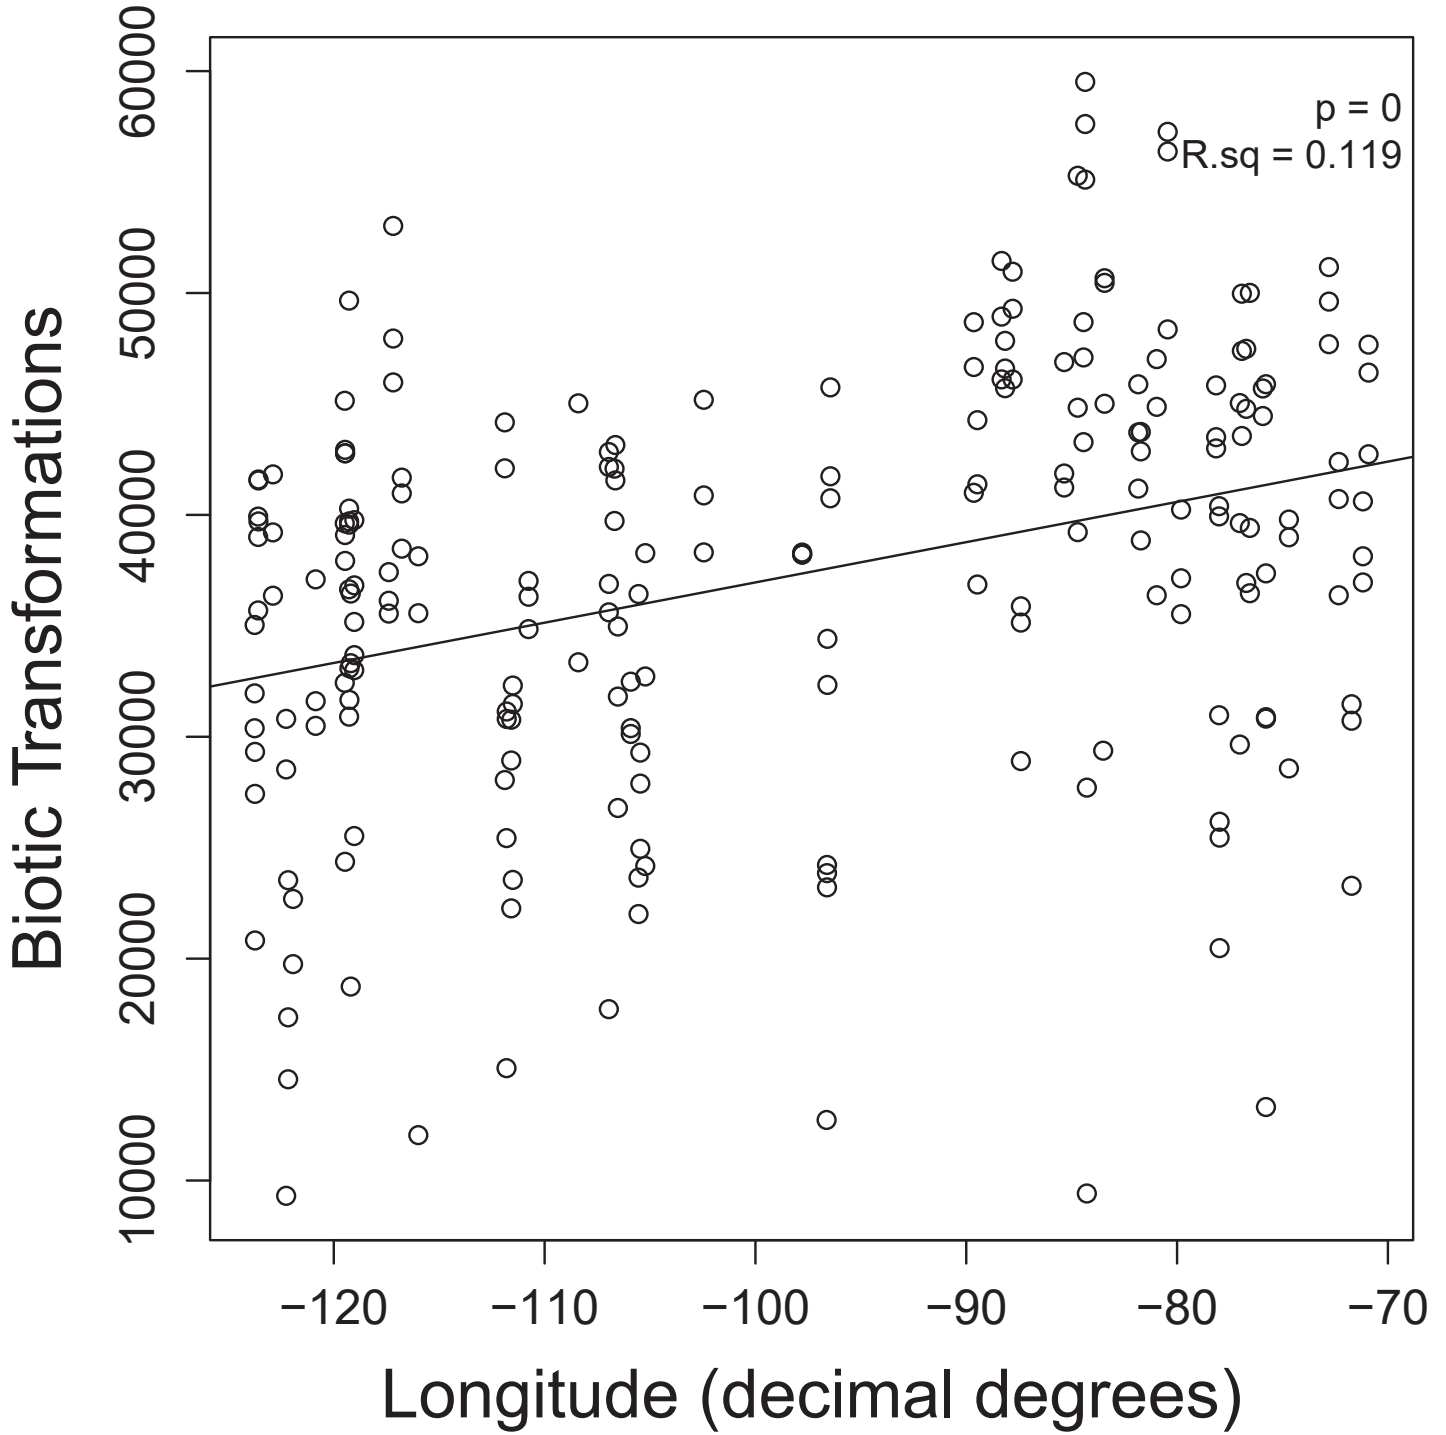

# Sediment

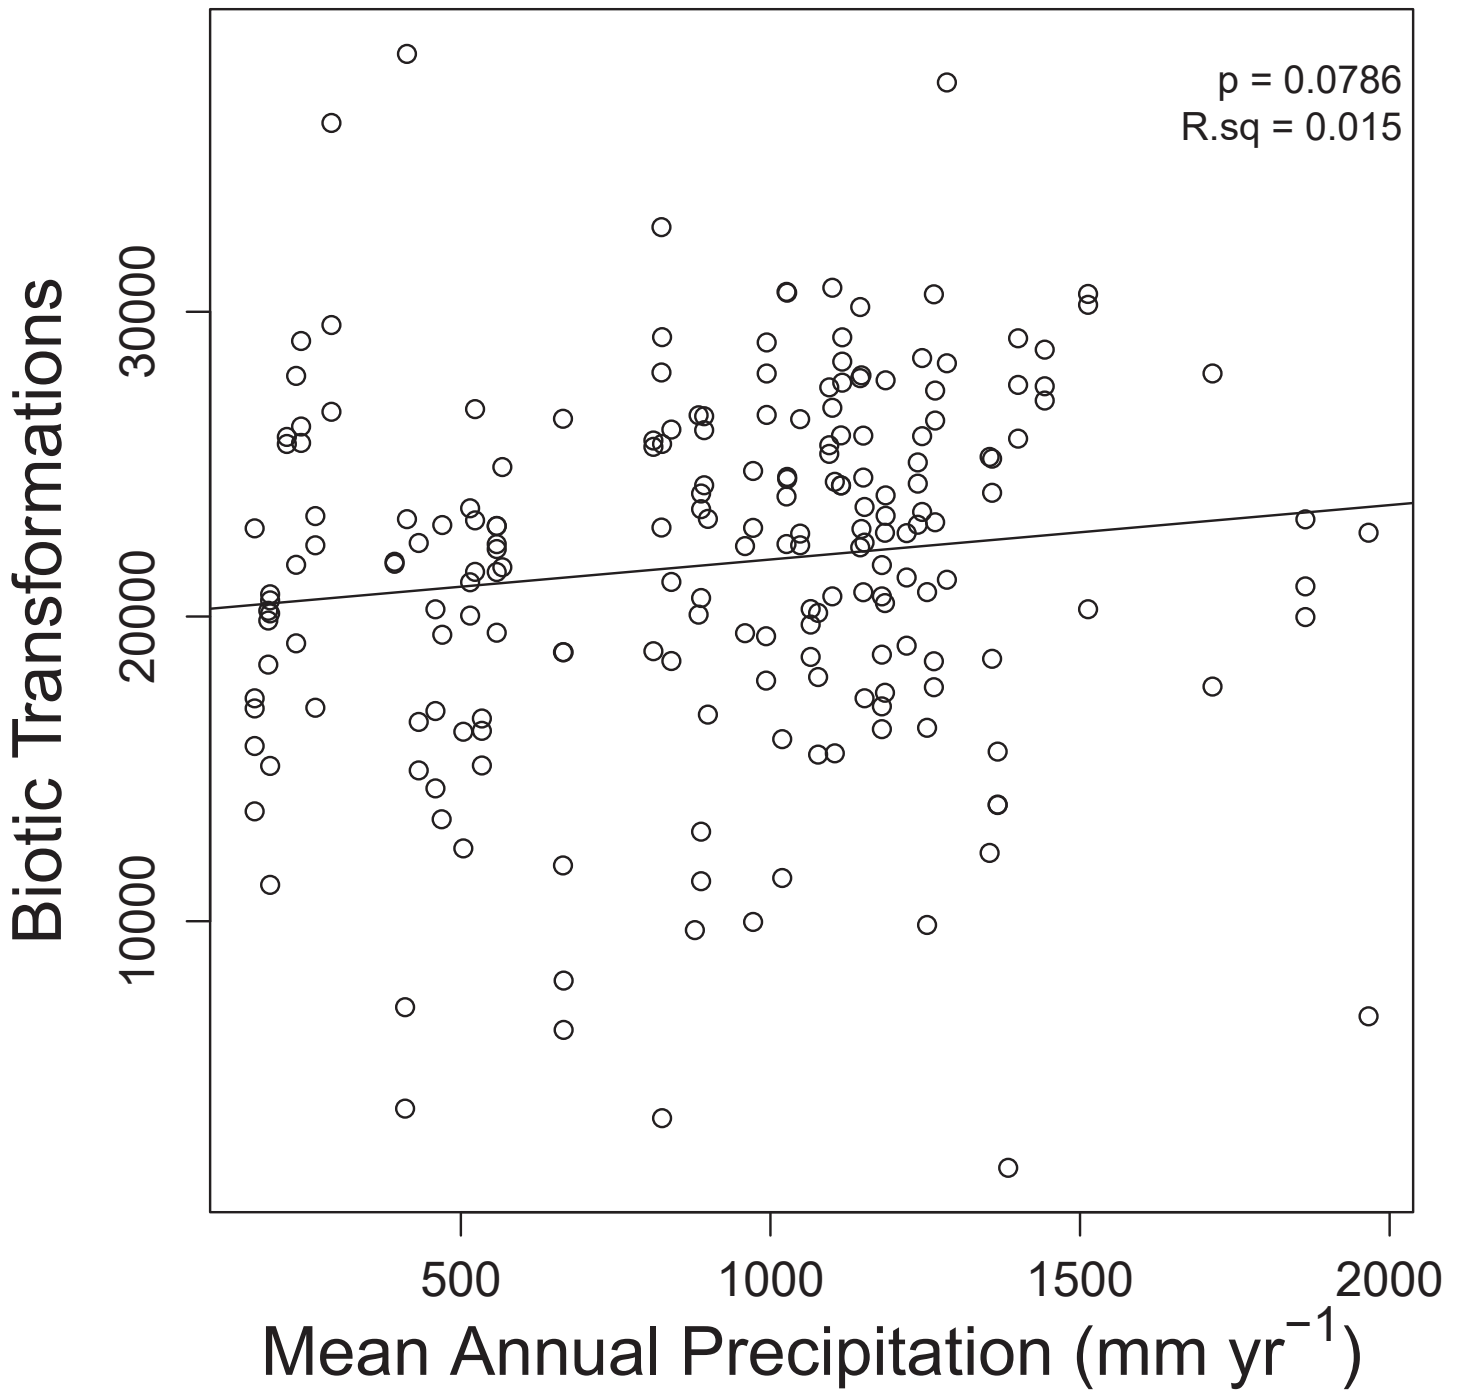

# Surface Water

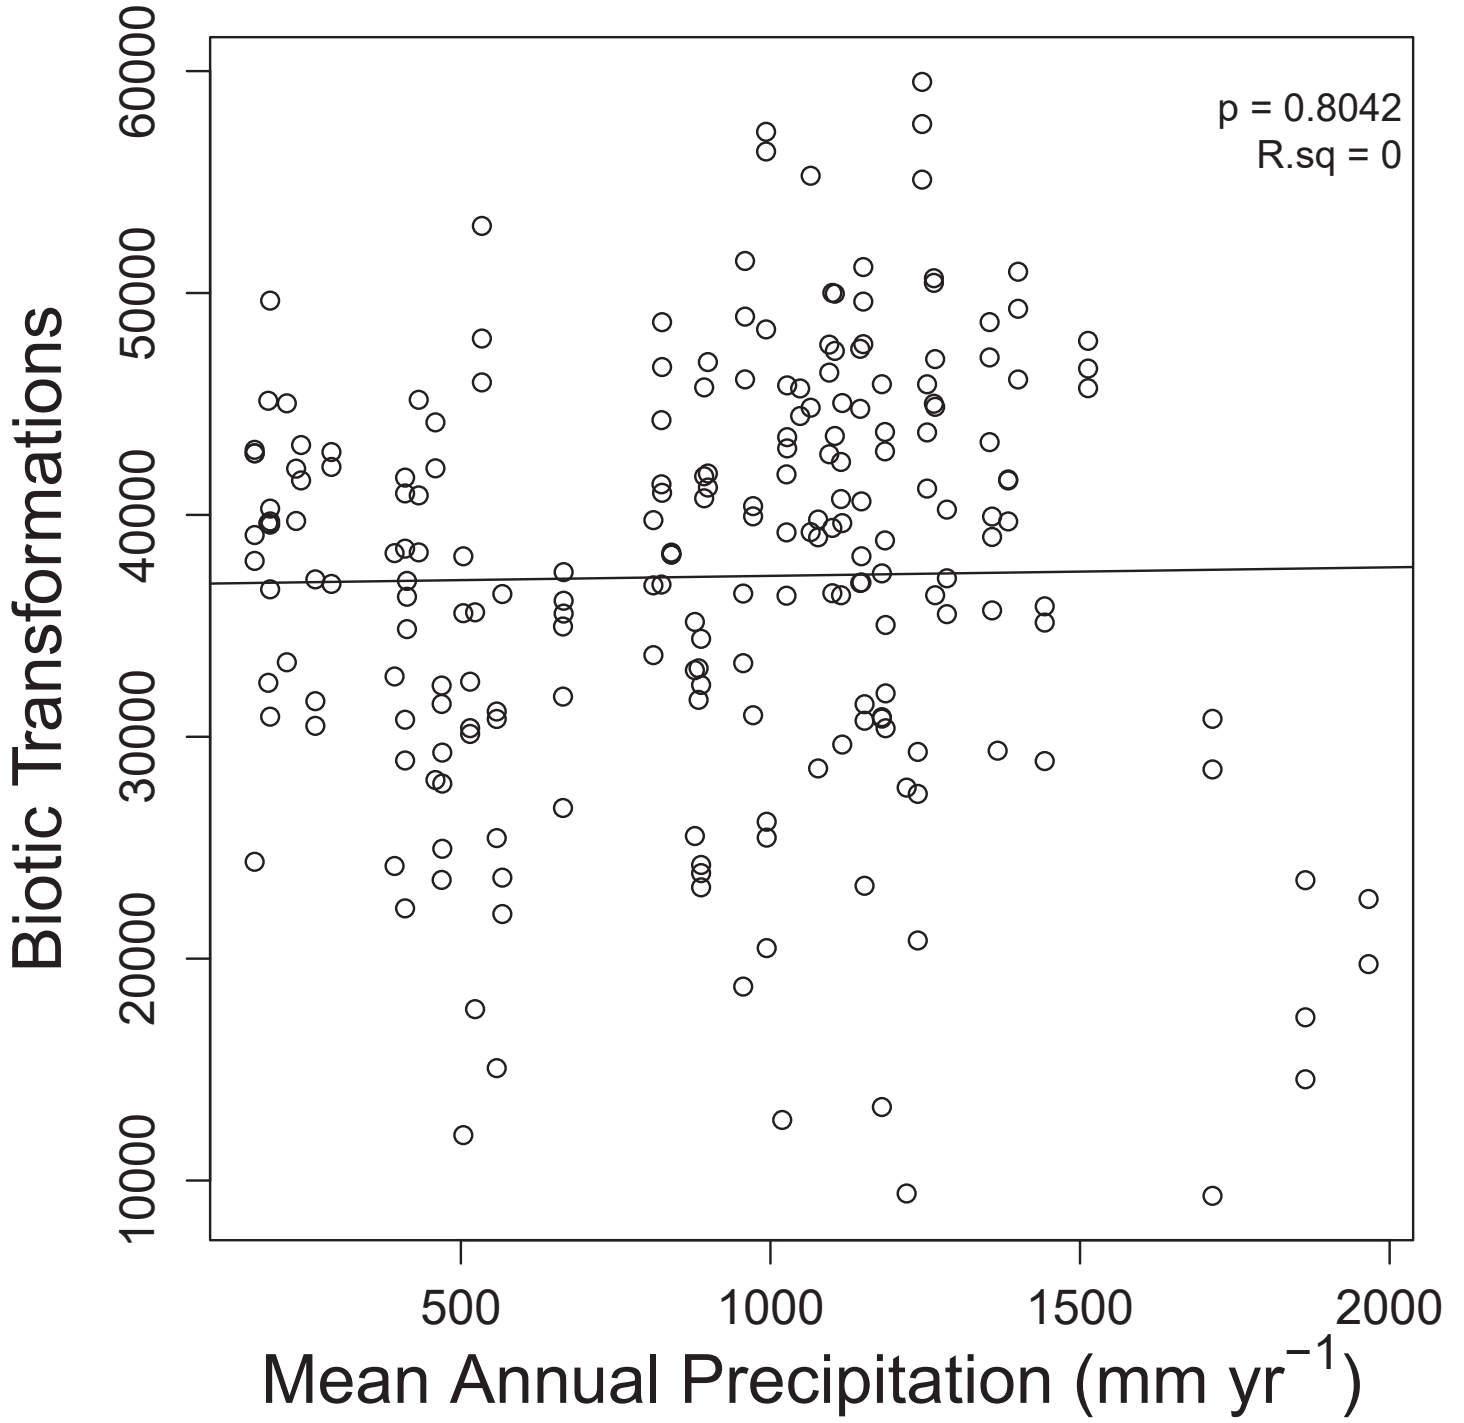

# Sediment

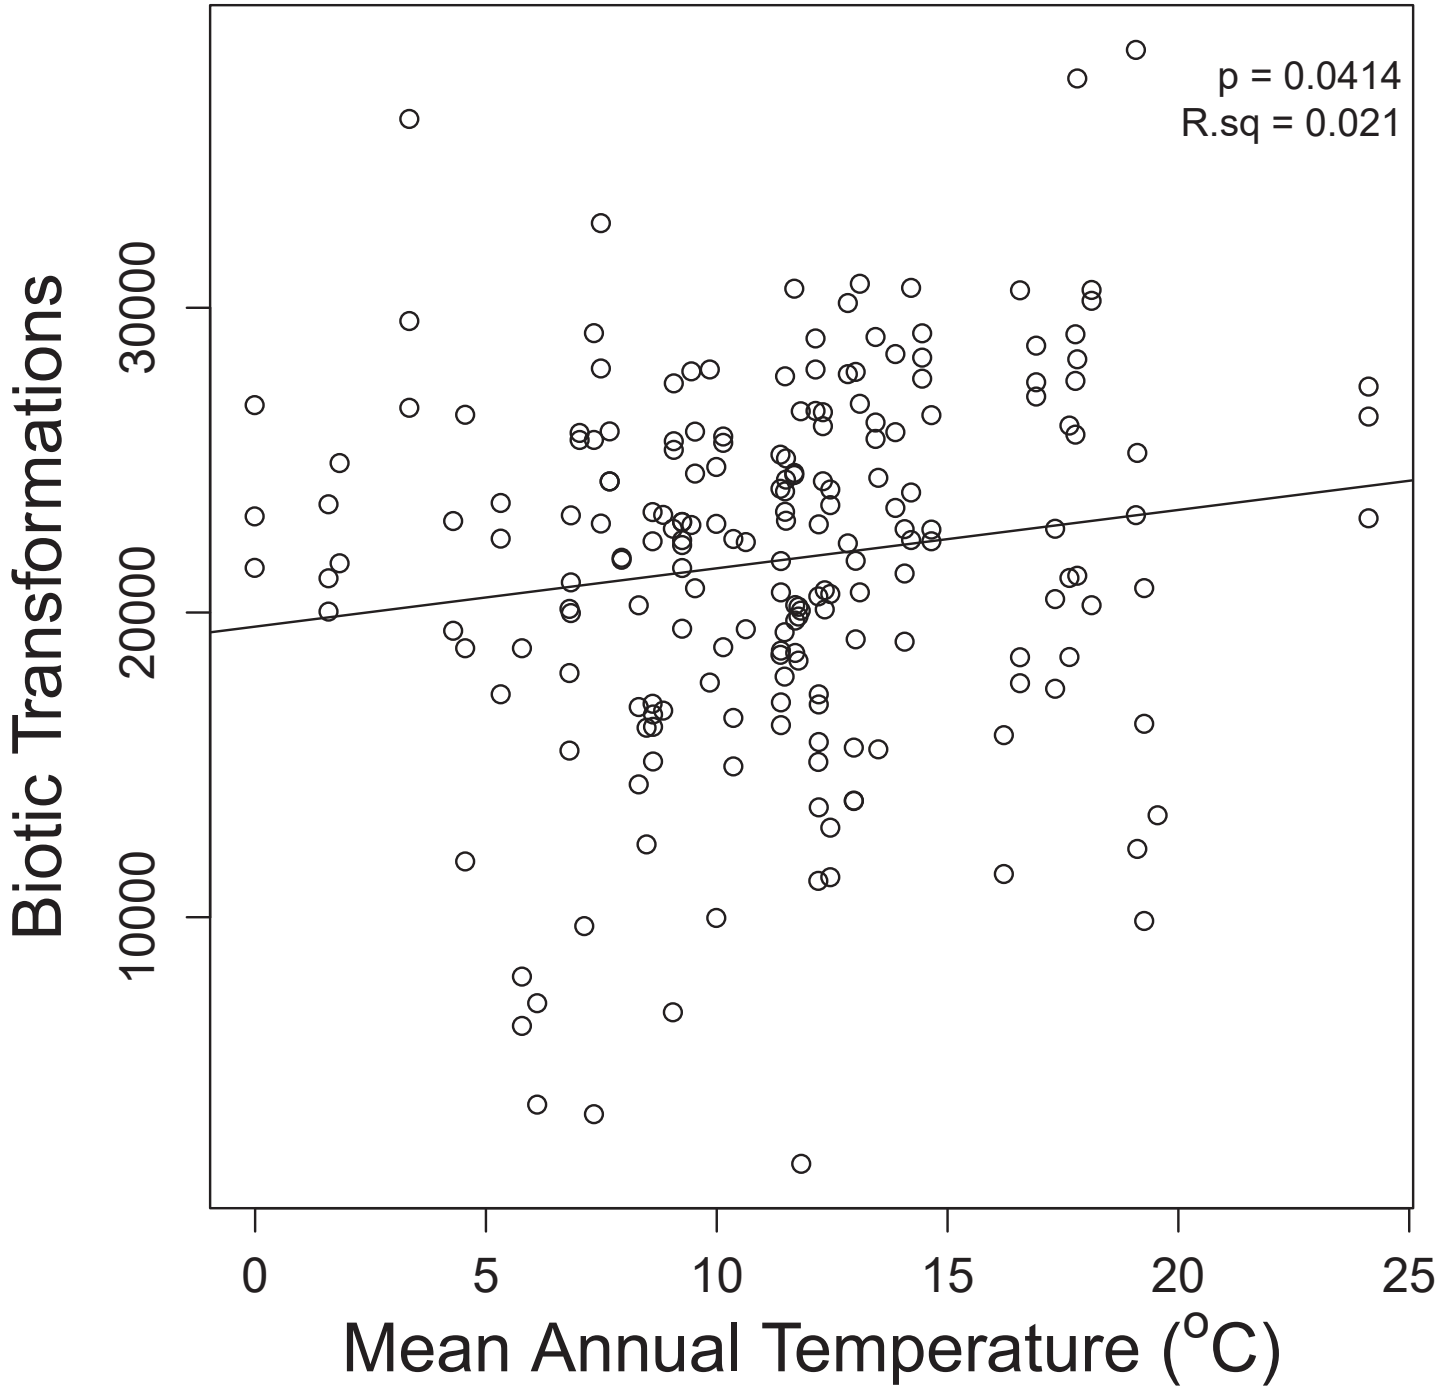

# Surface Water

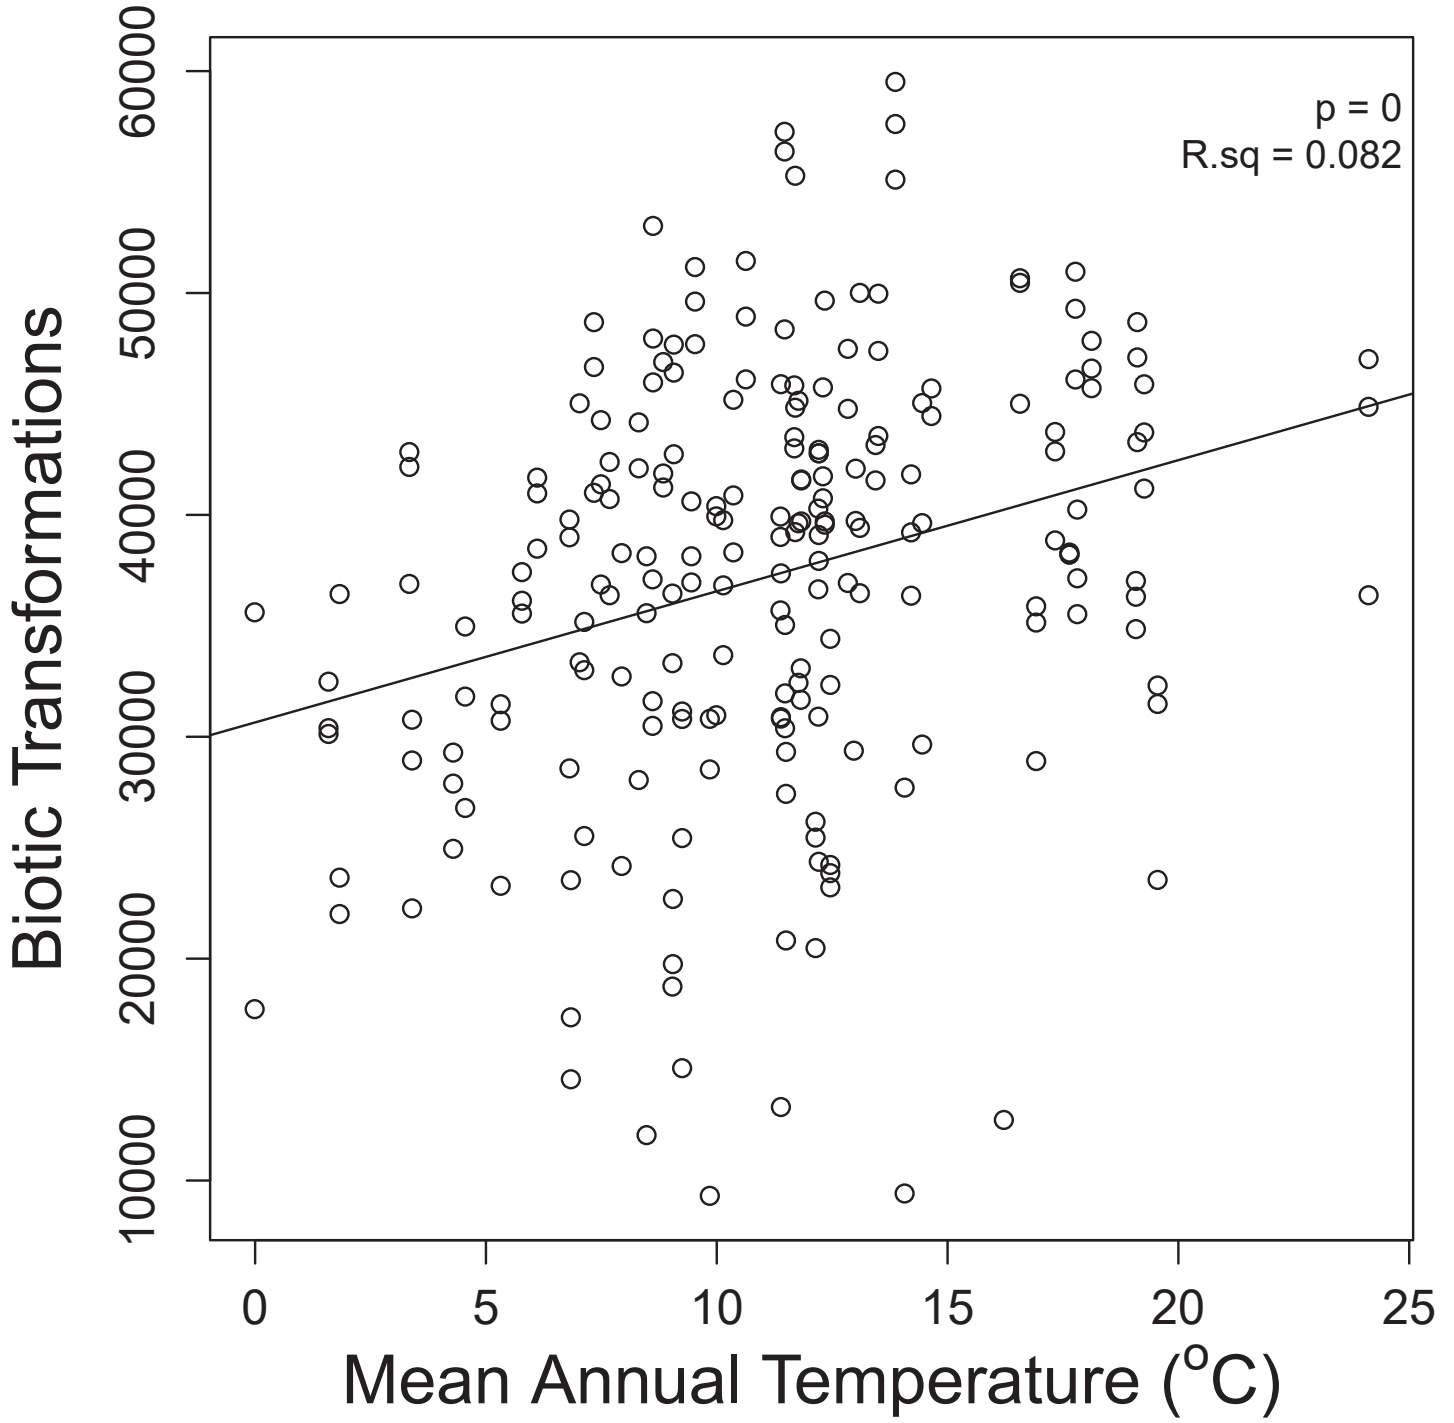

# Sediment

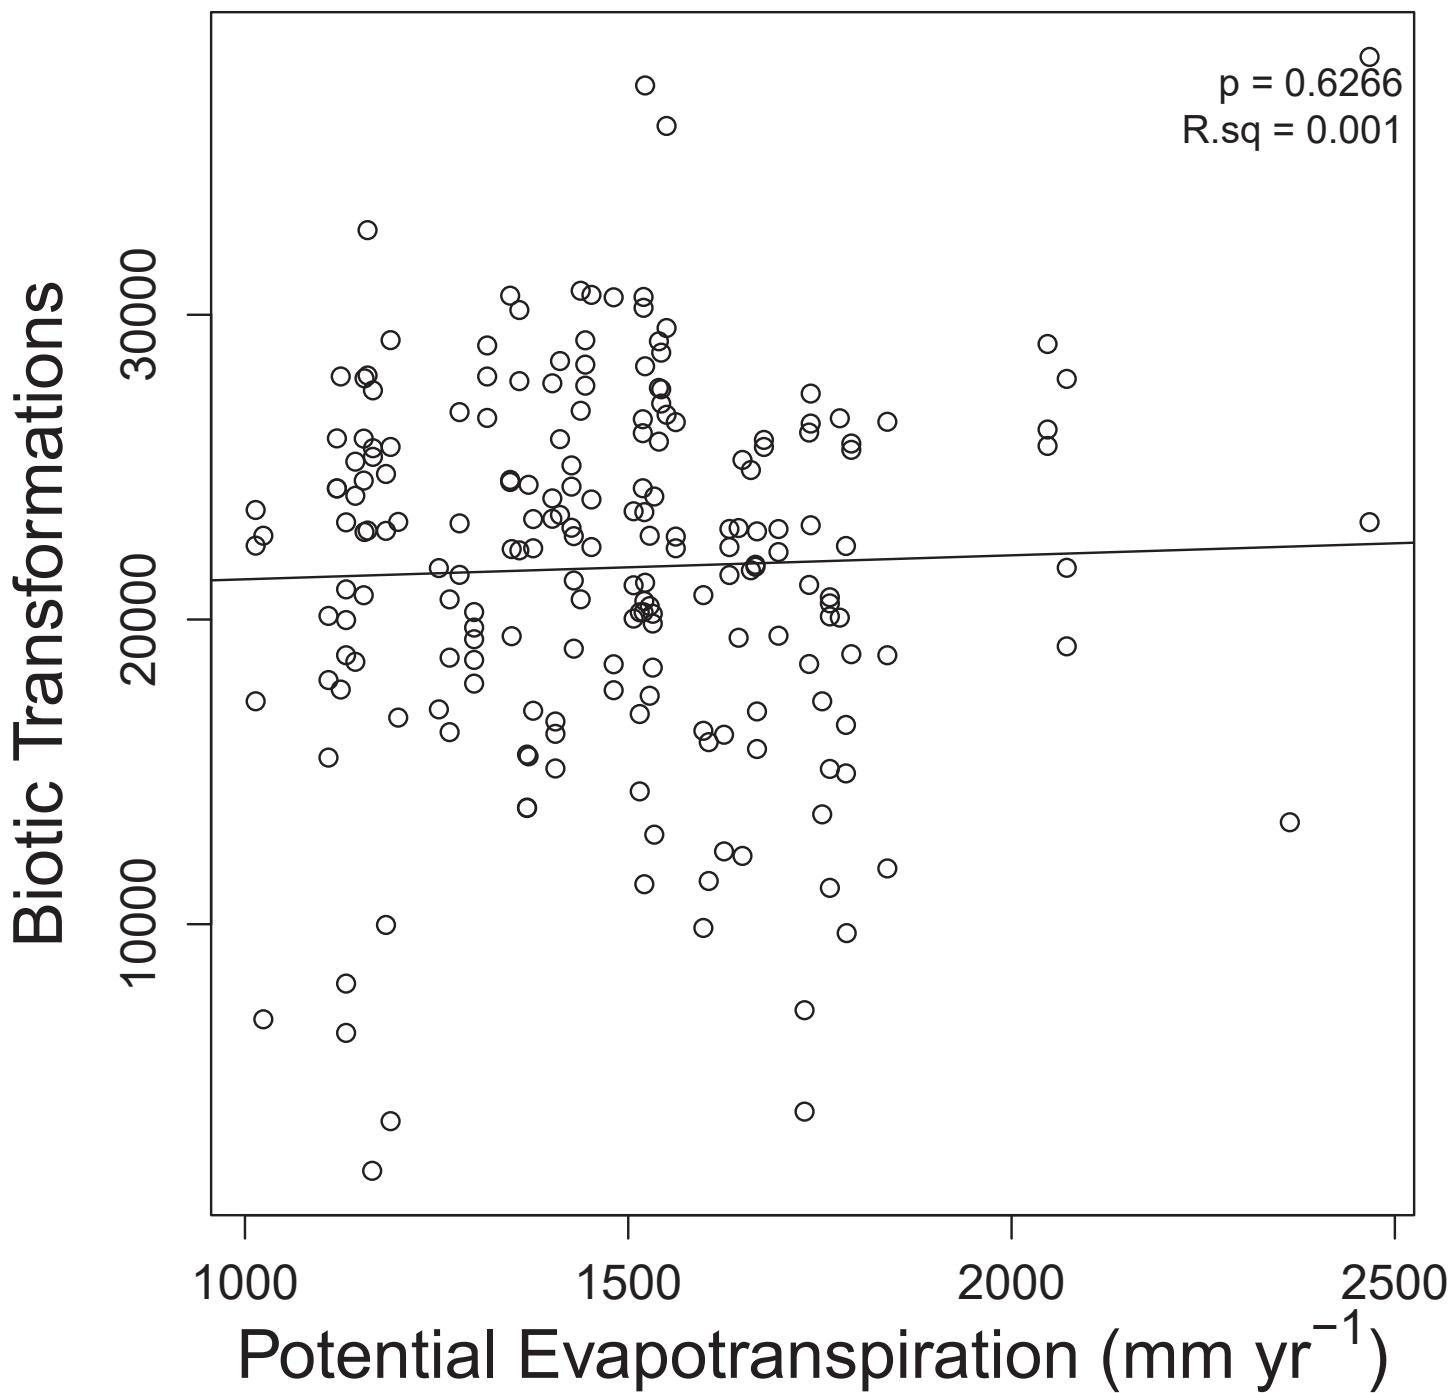

# Surface Water

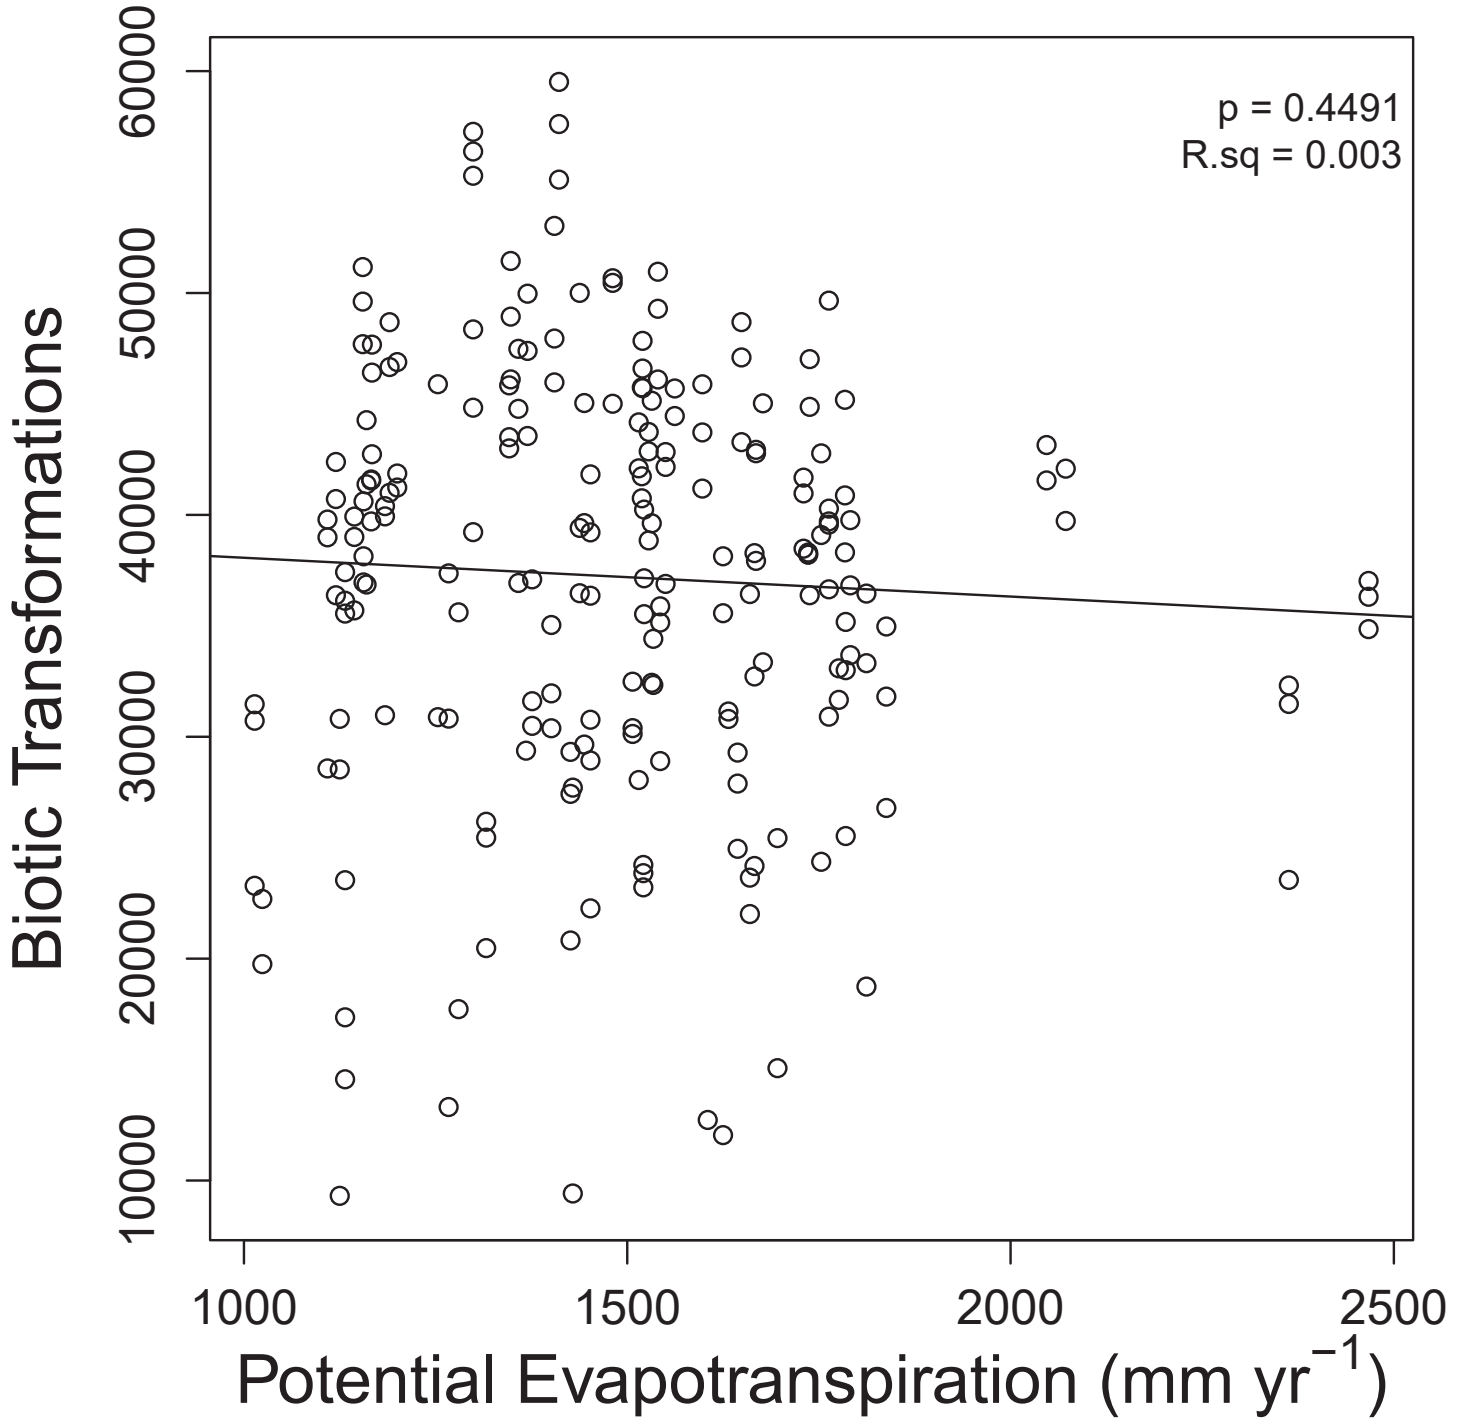



# Sediment

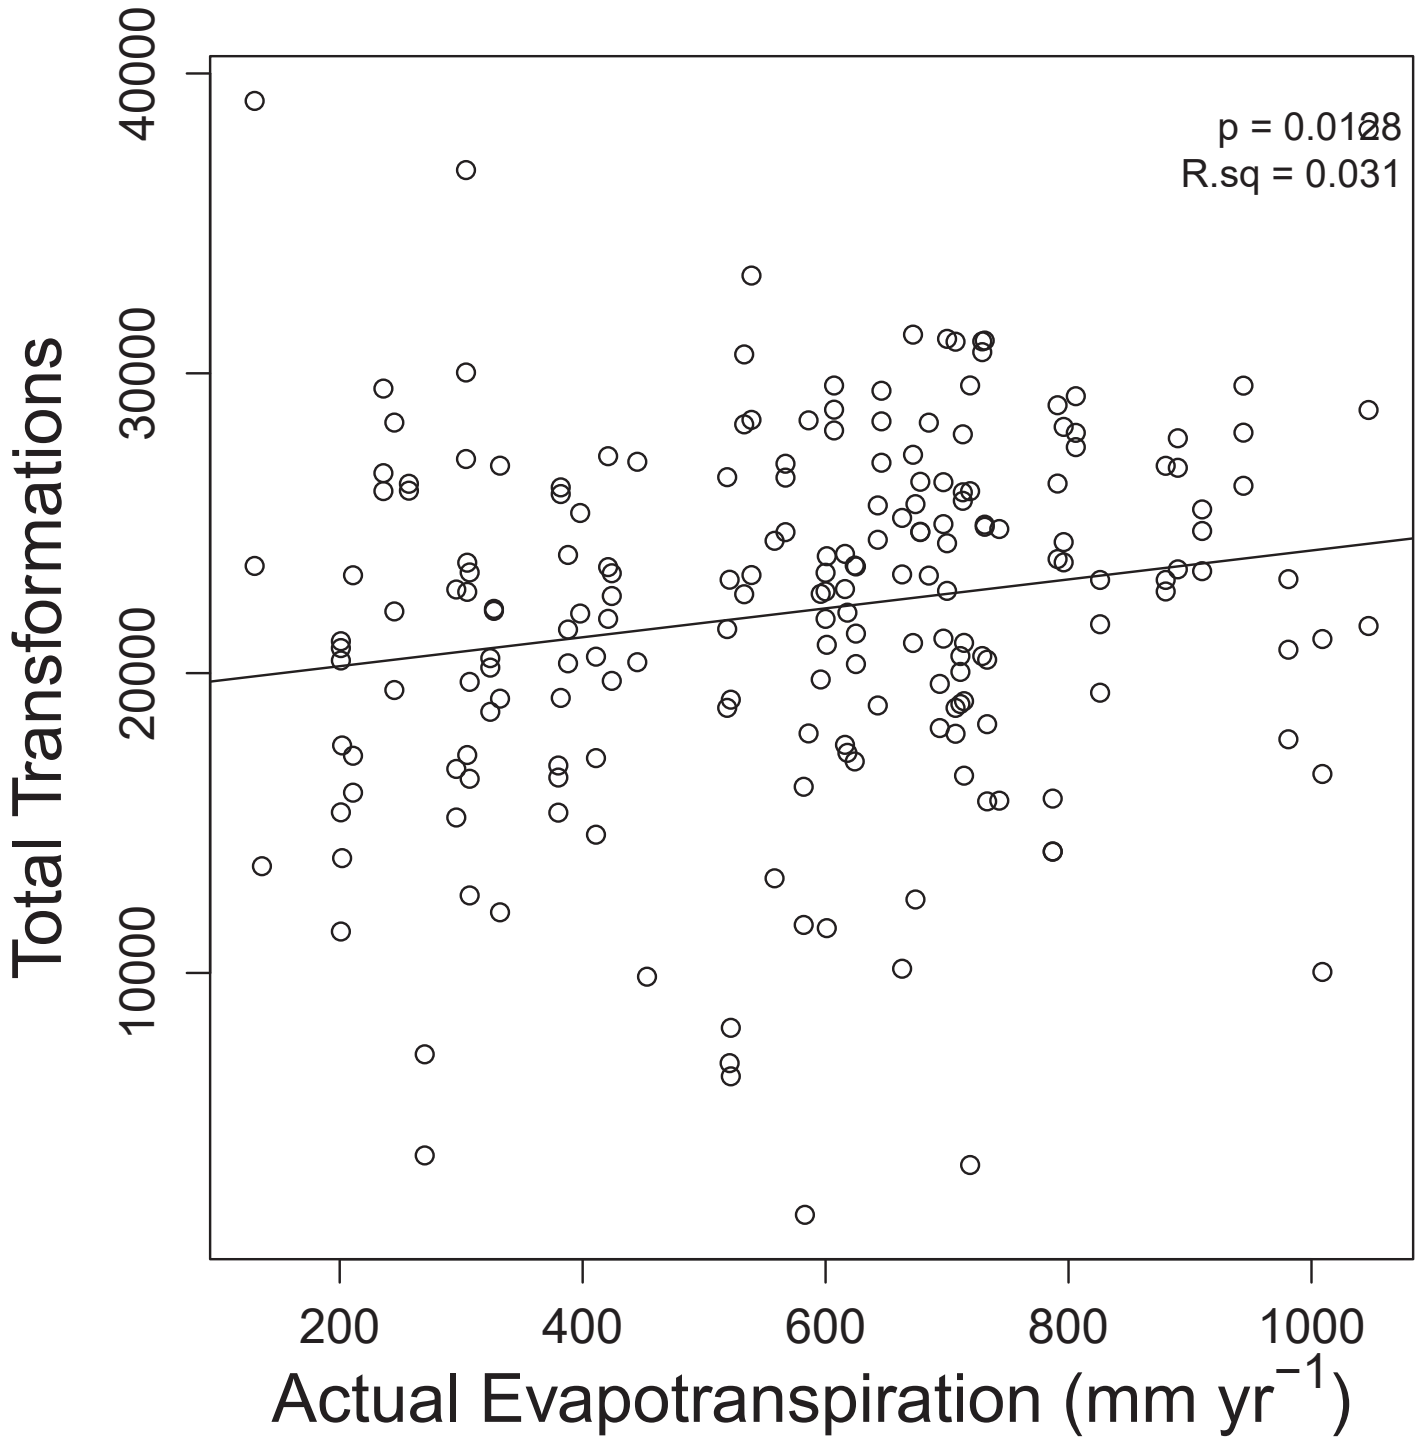

### Surface Water

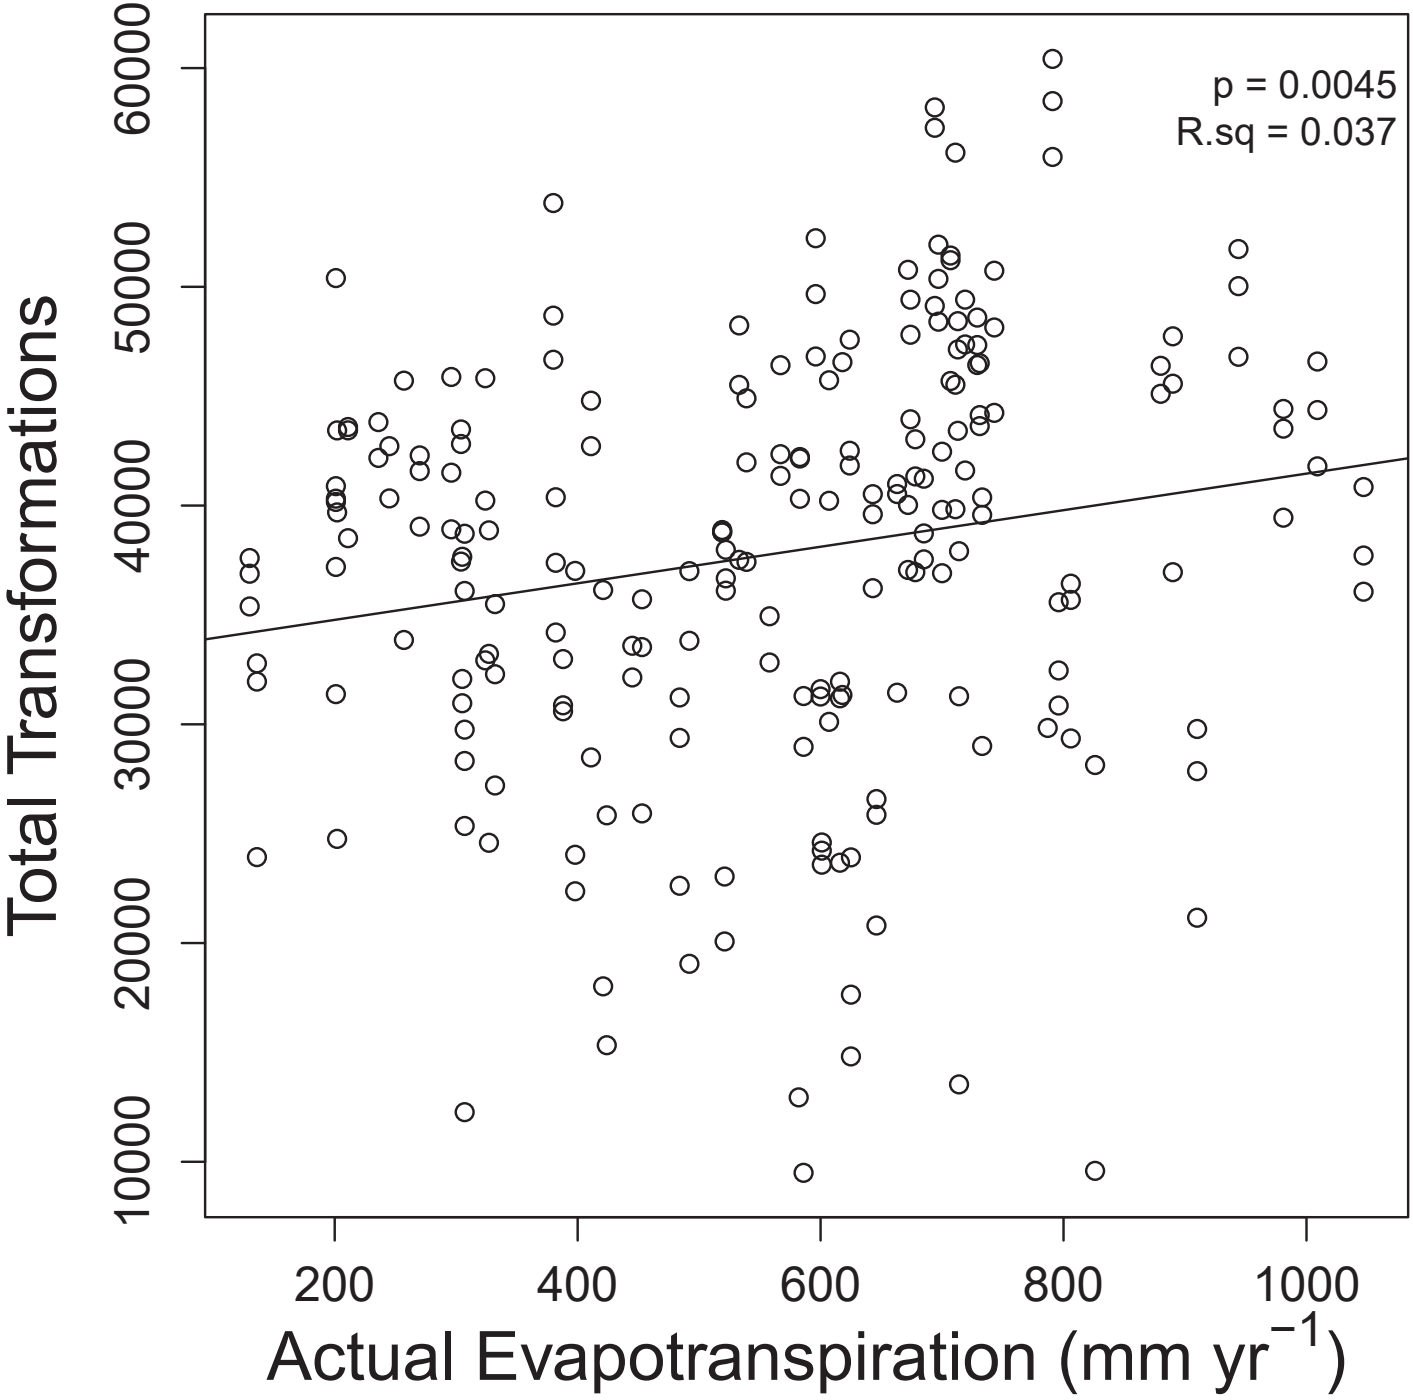

# Sediment

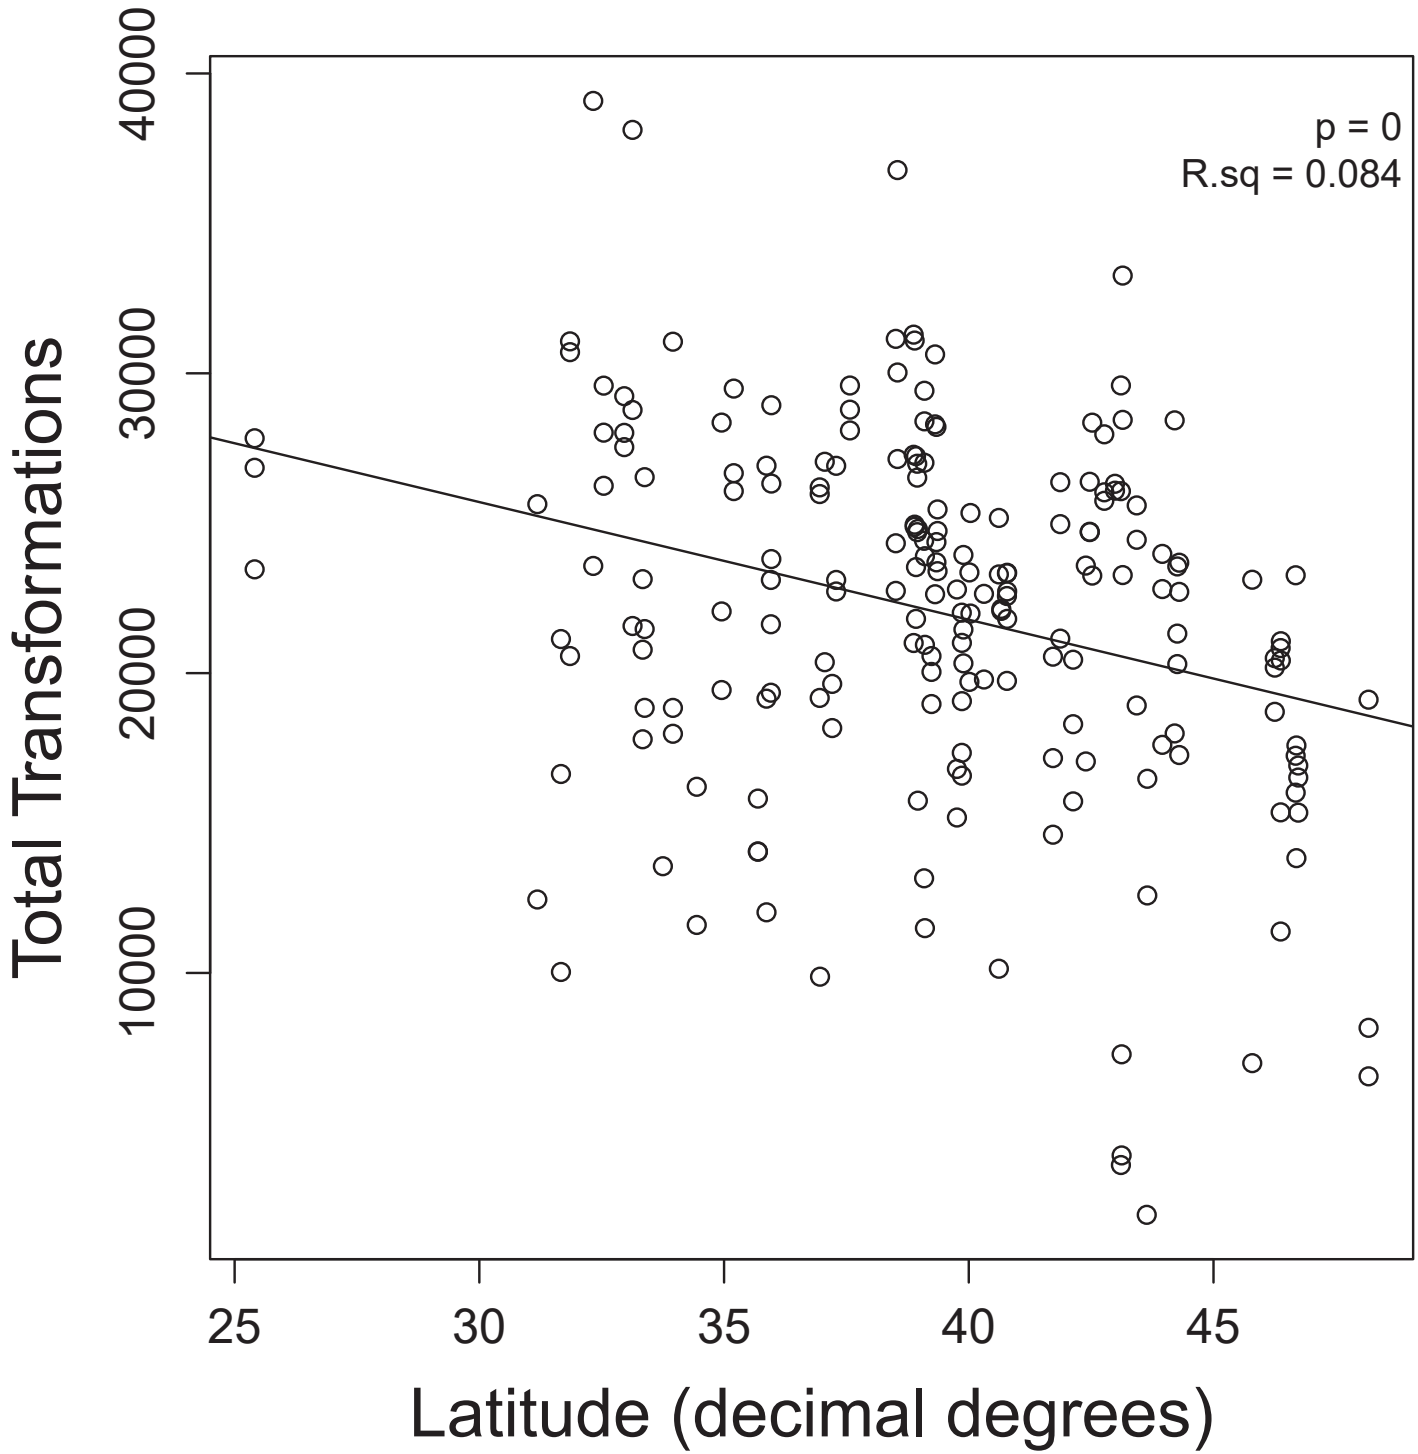

# Surface Water

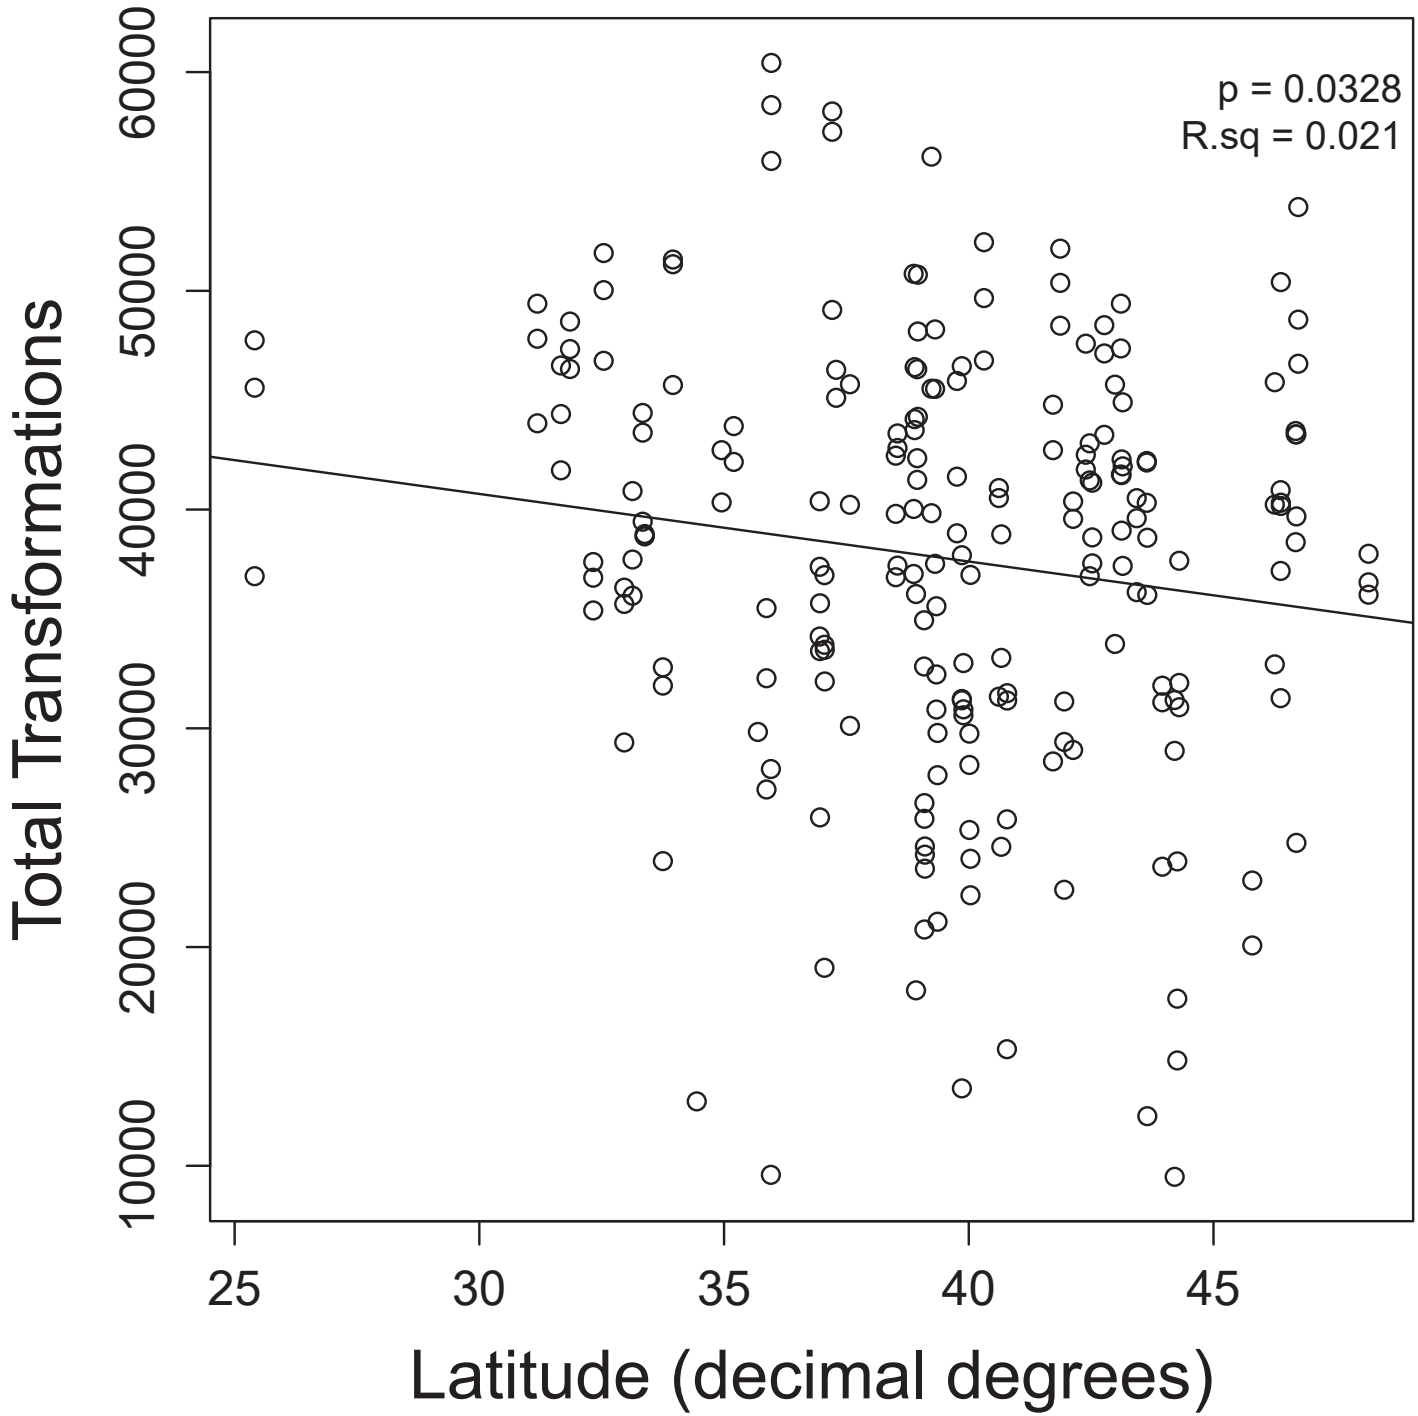

# Sediment

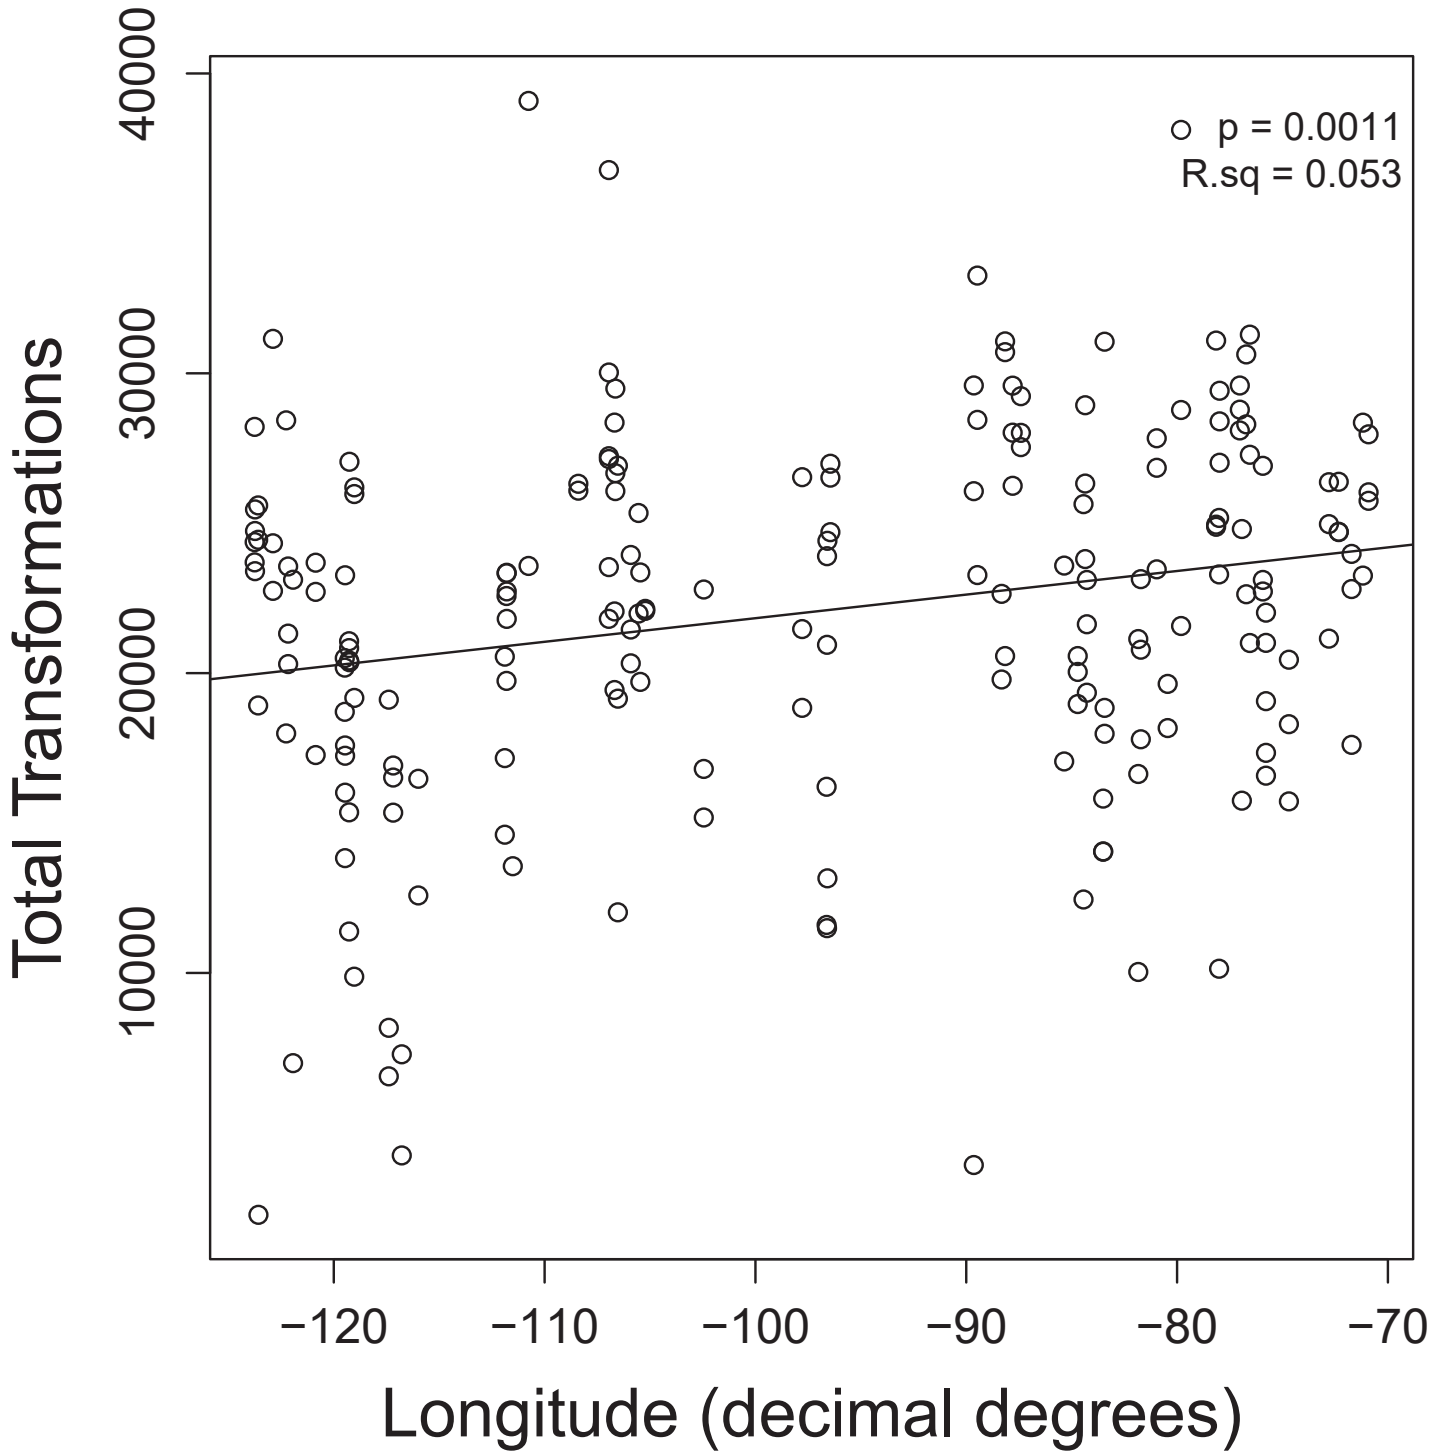

# Surface Water

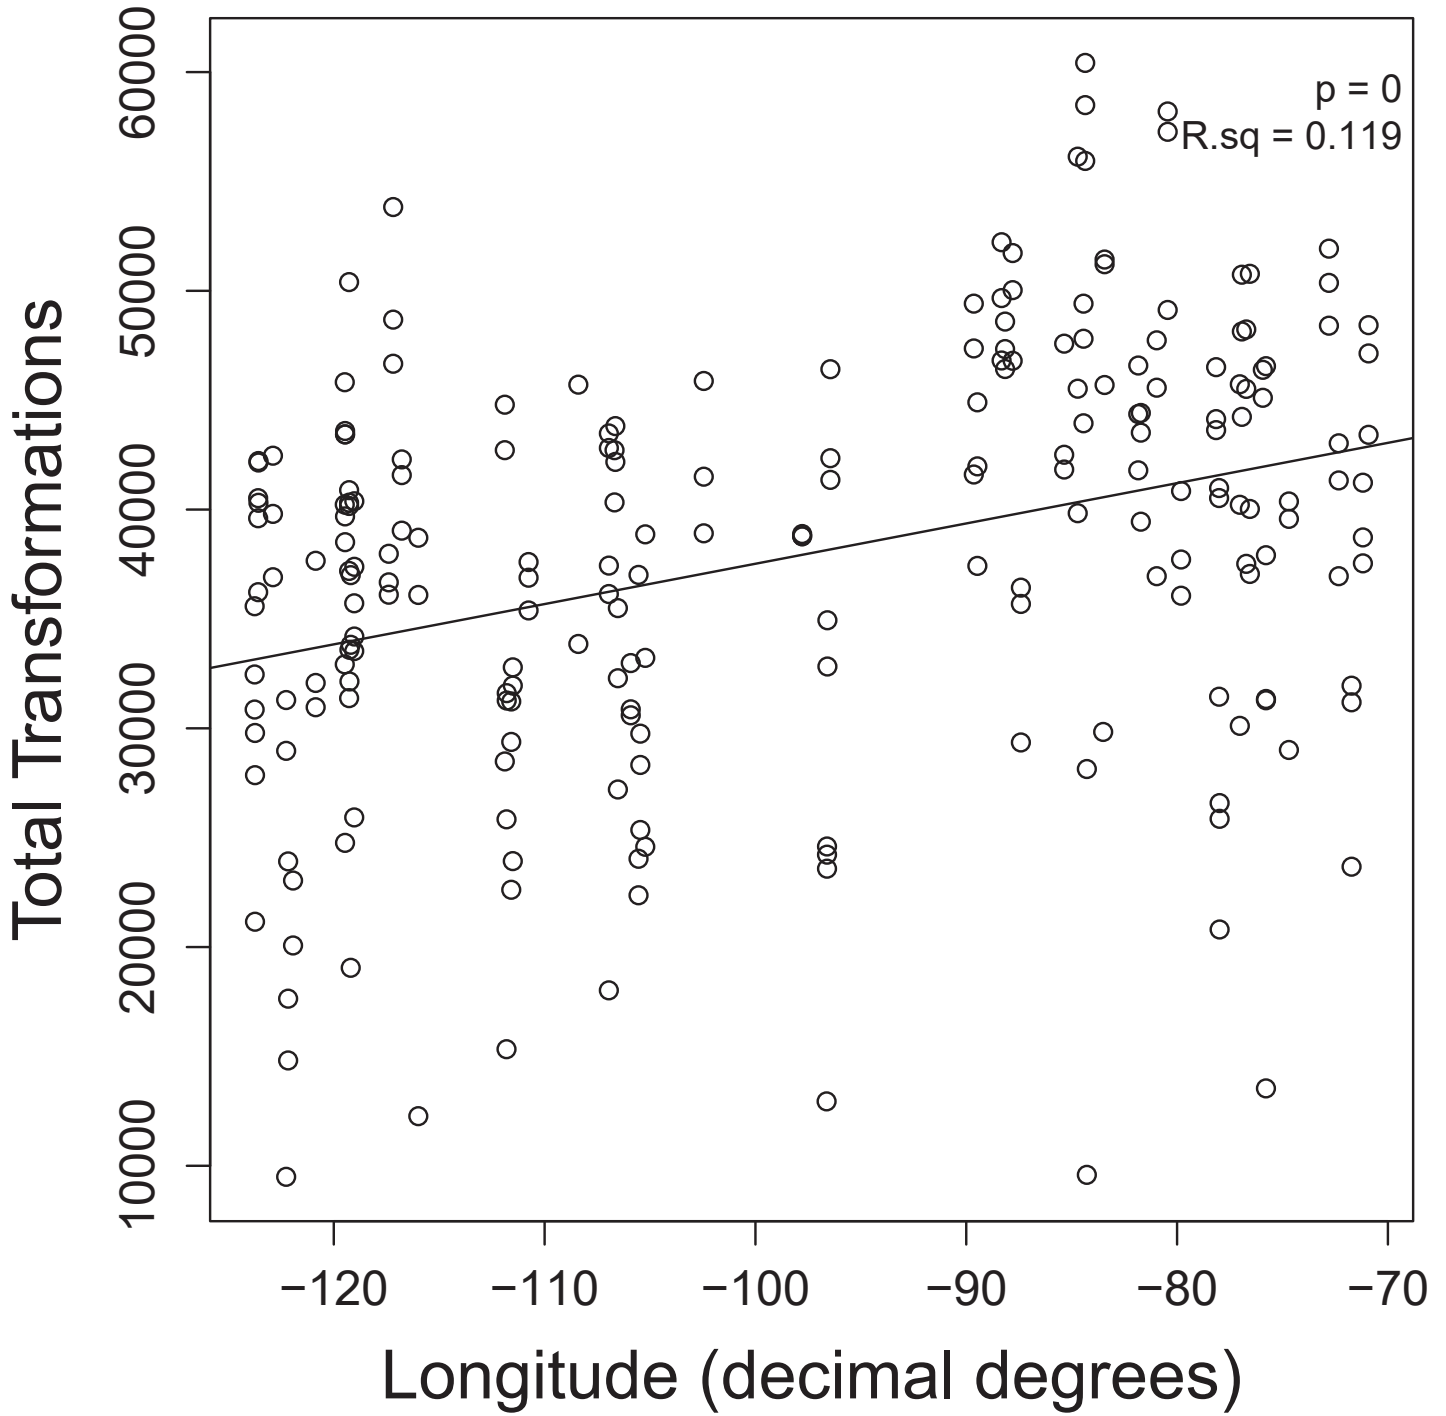

# Sediment

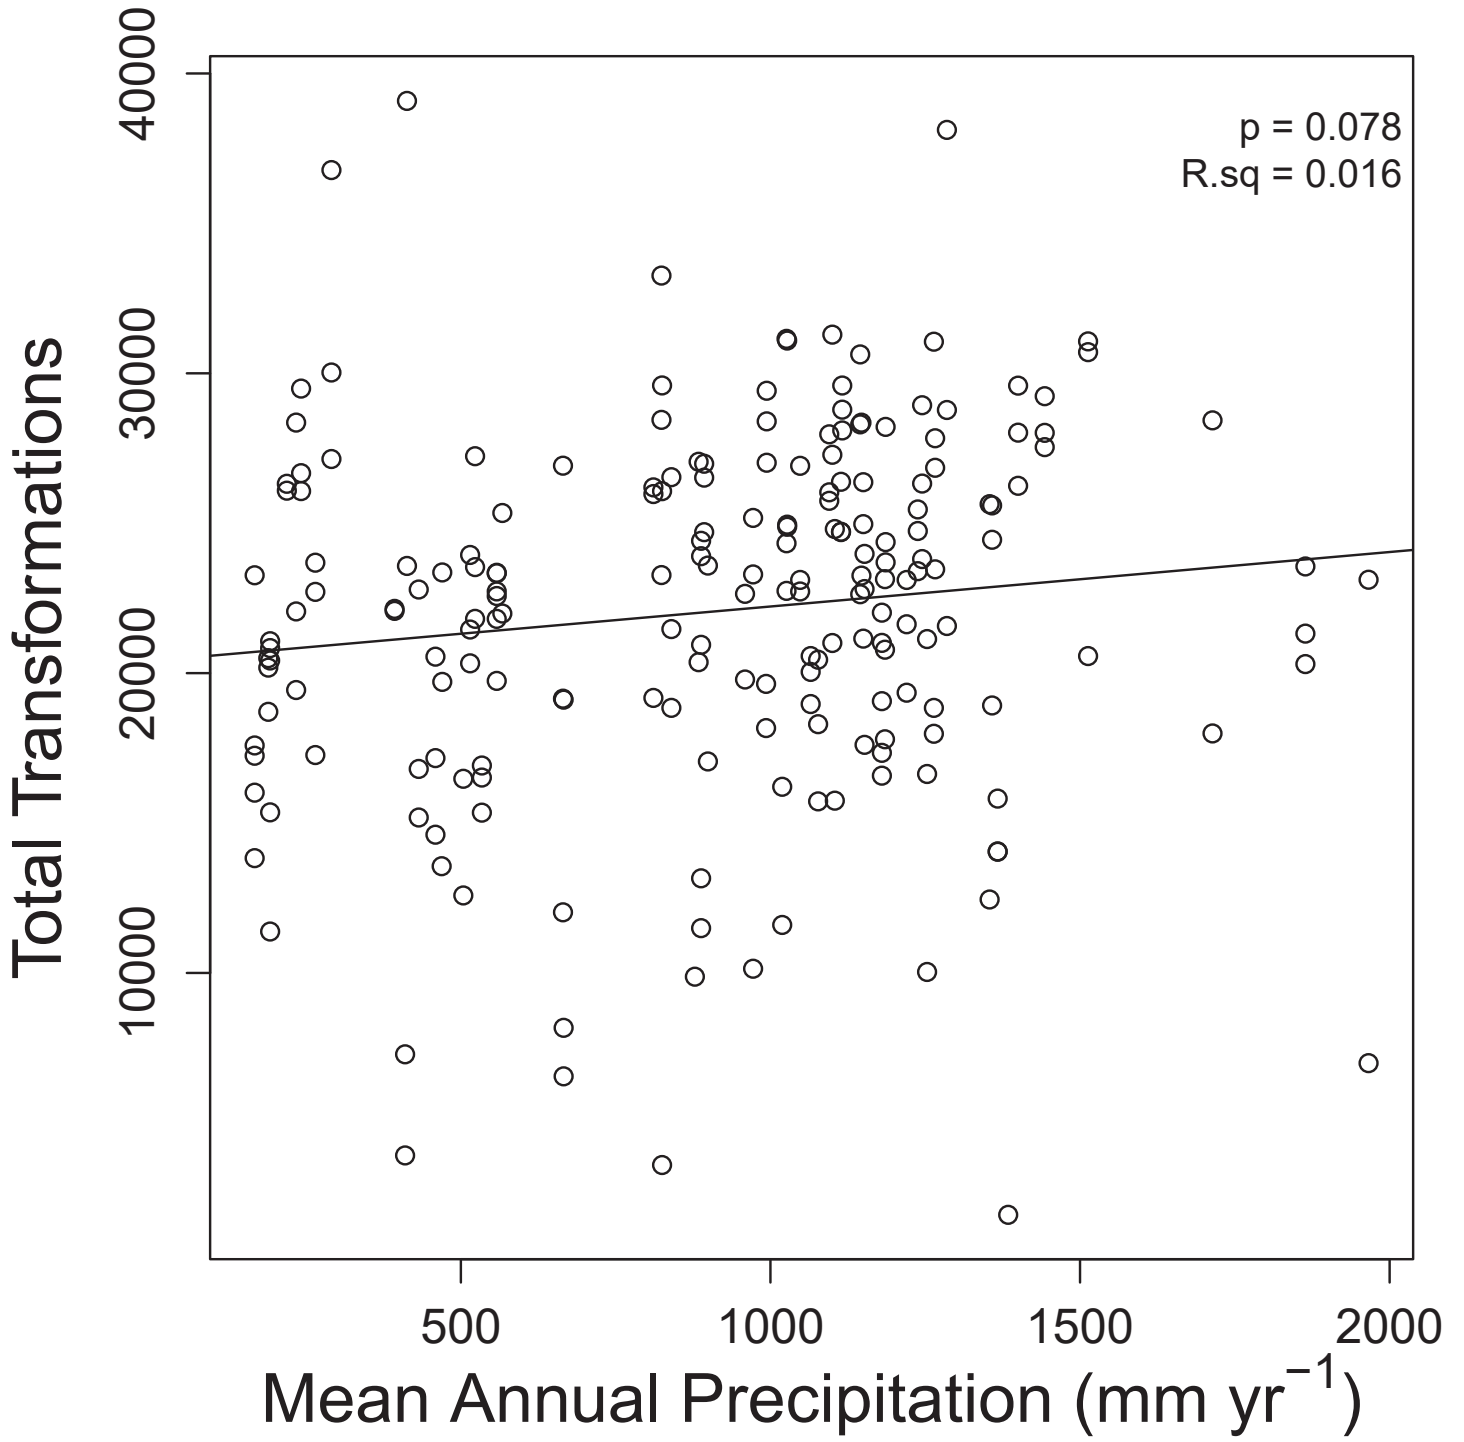





# Sediment

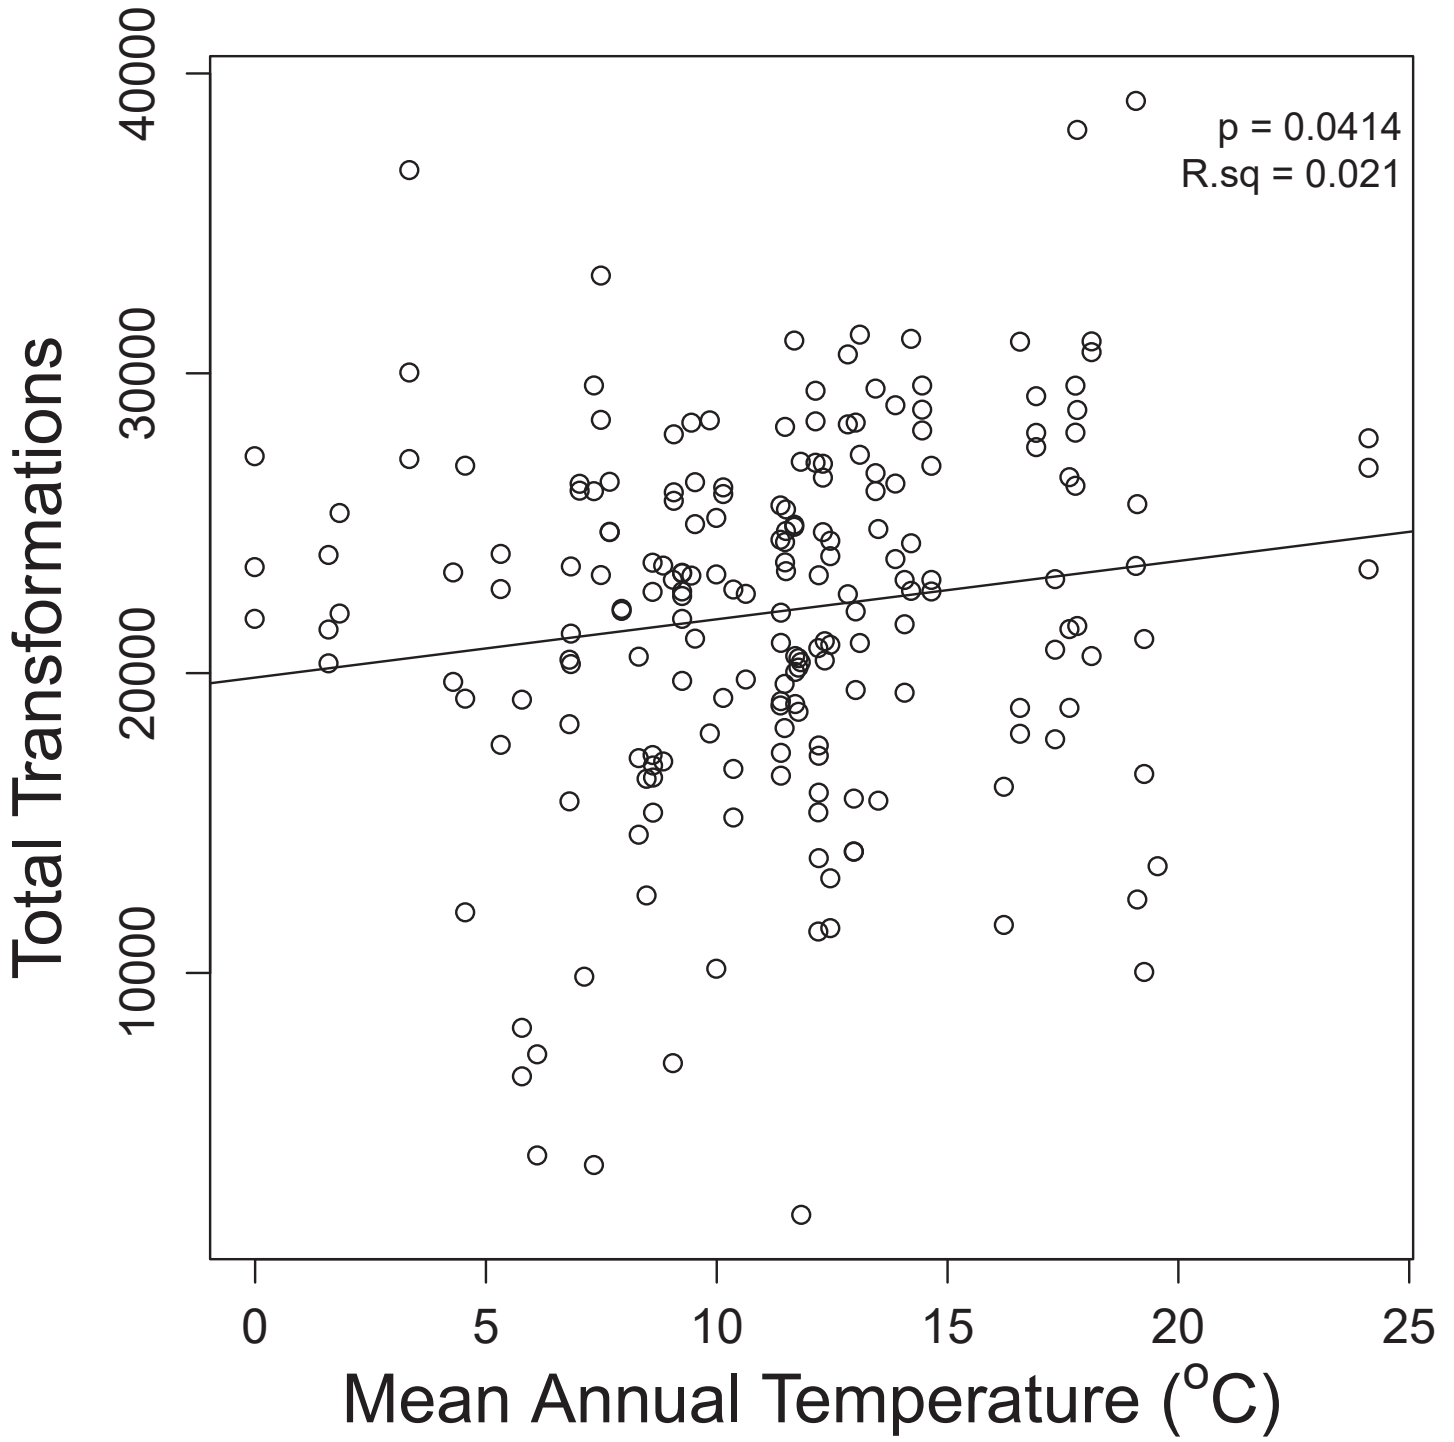

# Surface Water

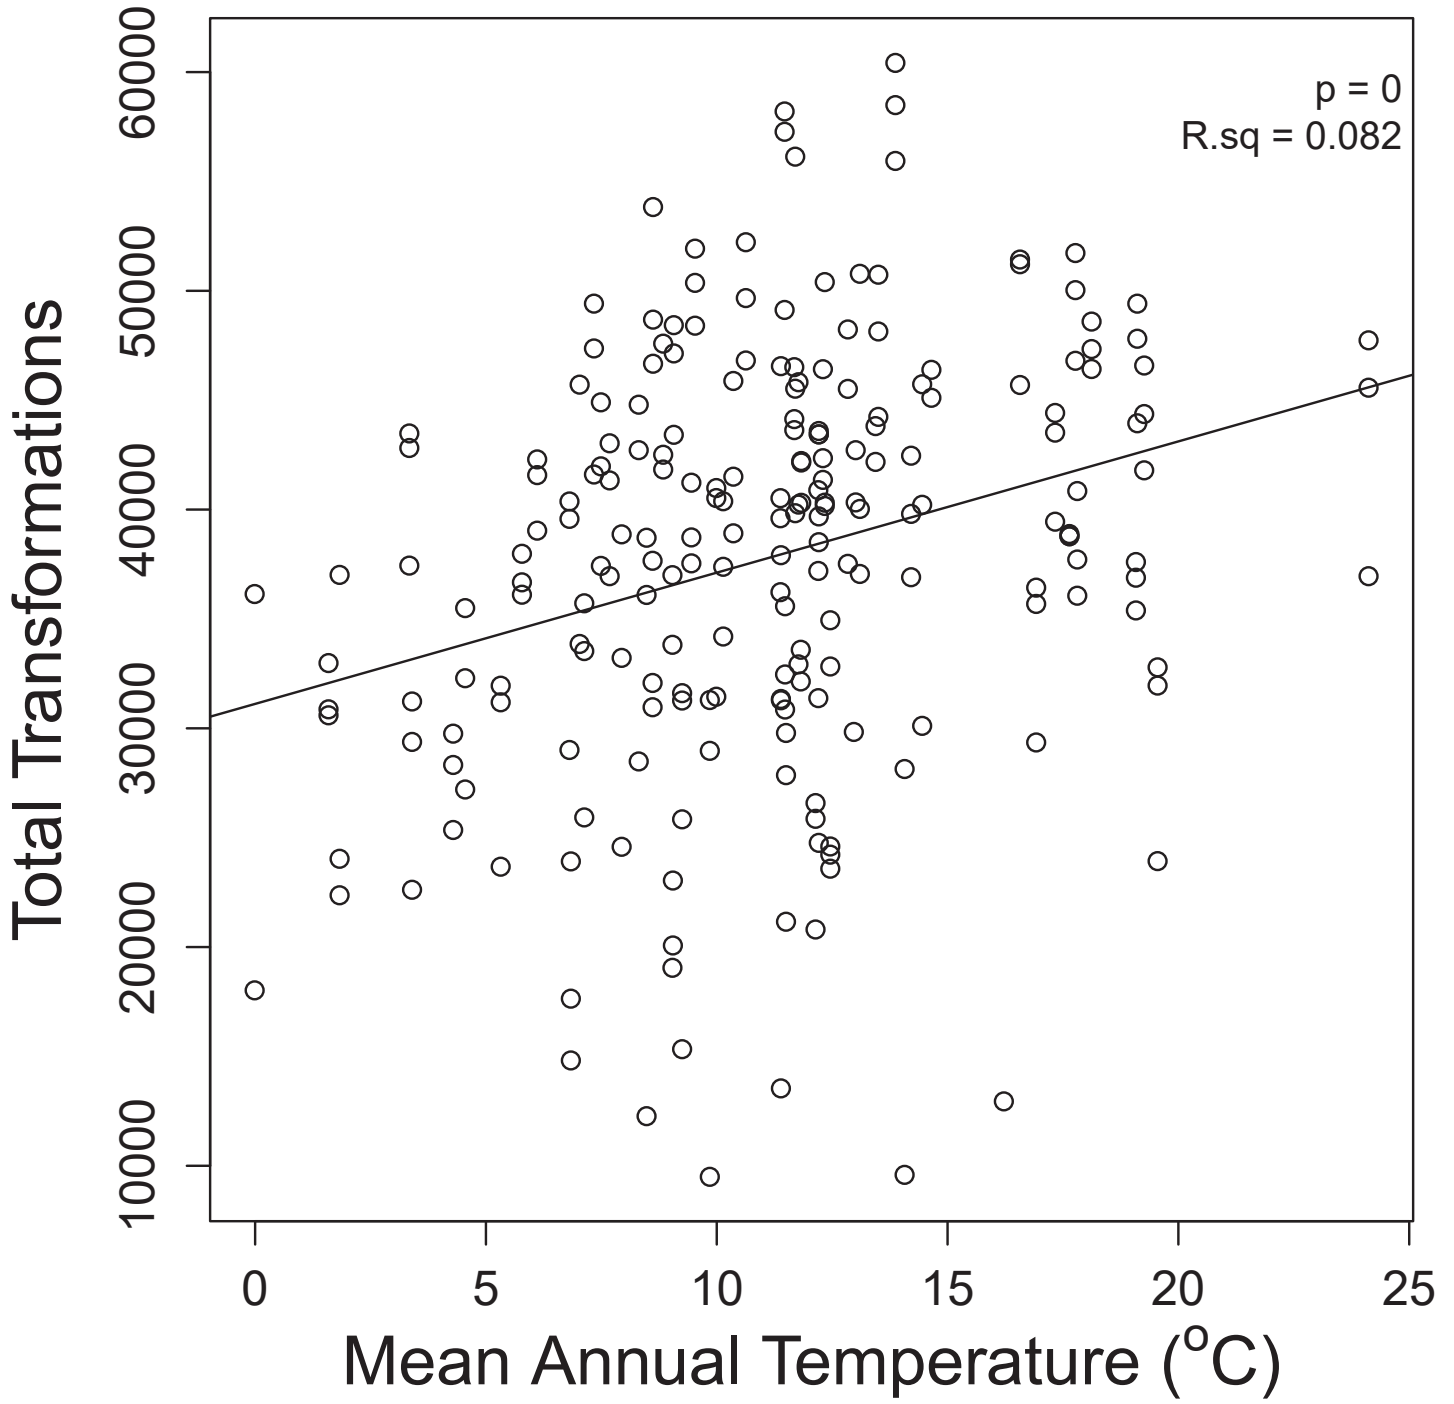

# Sediment

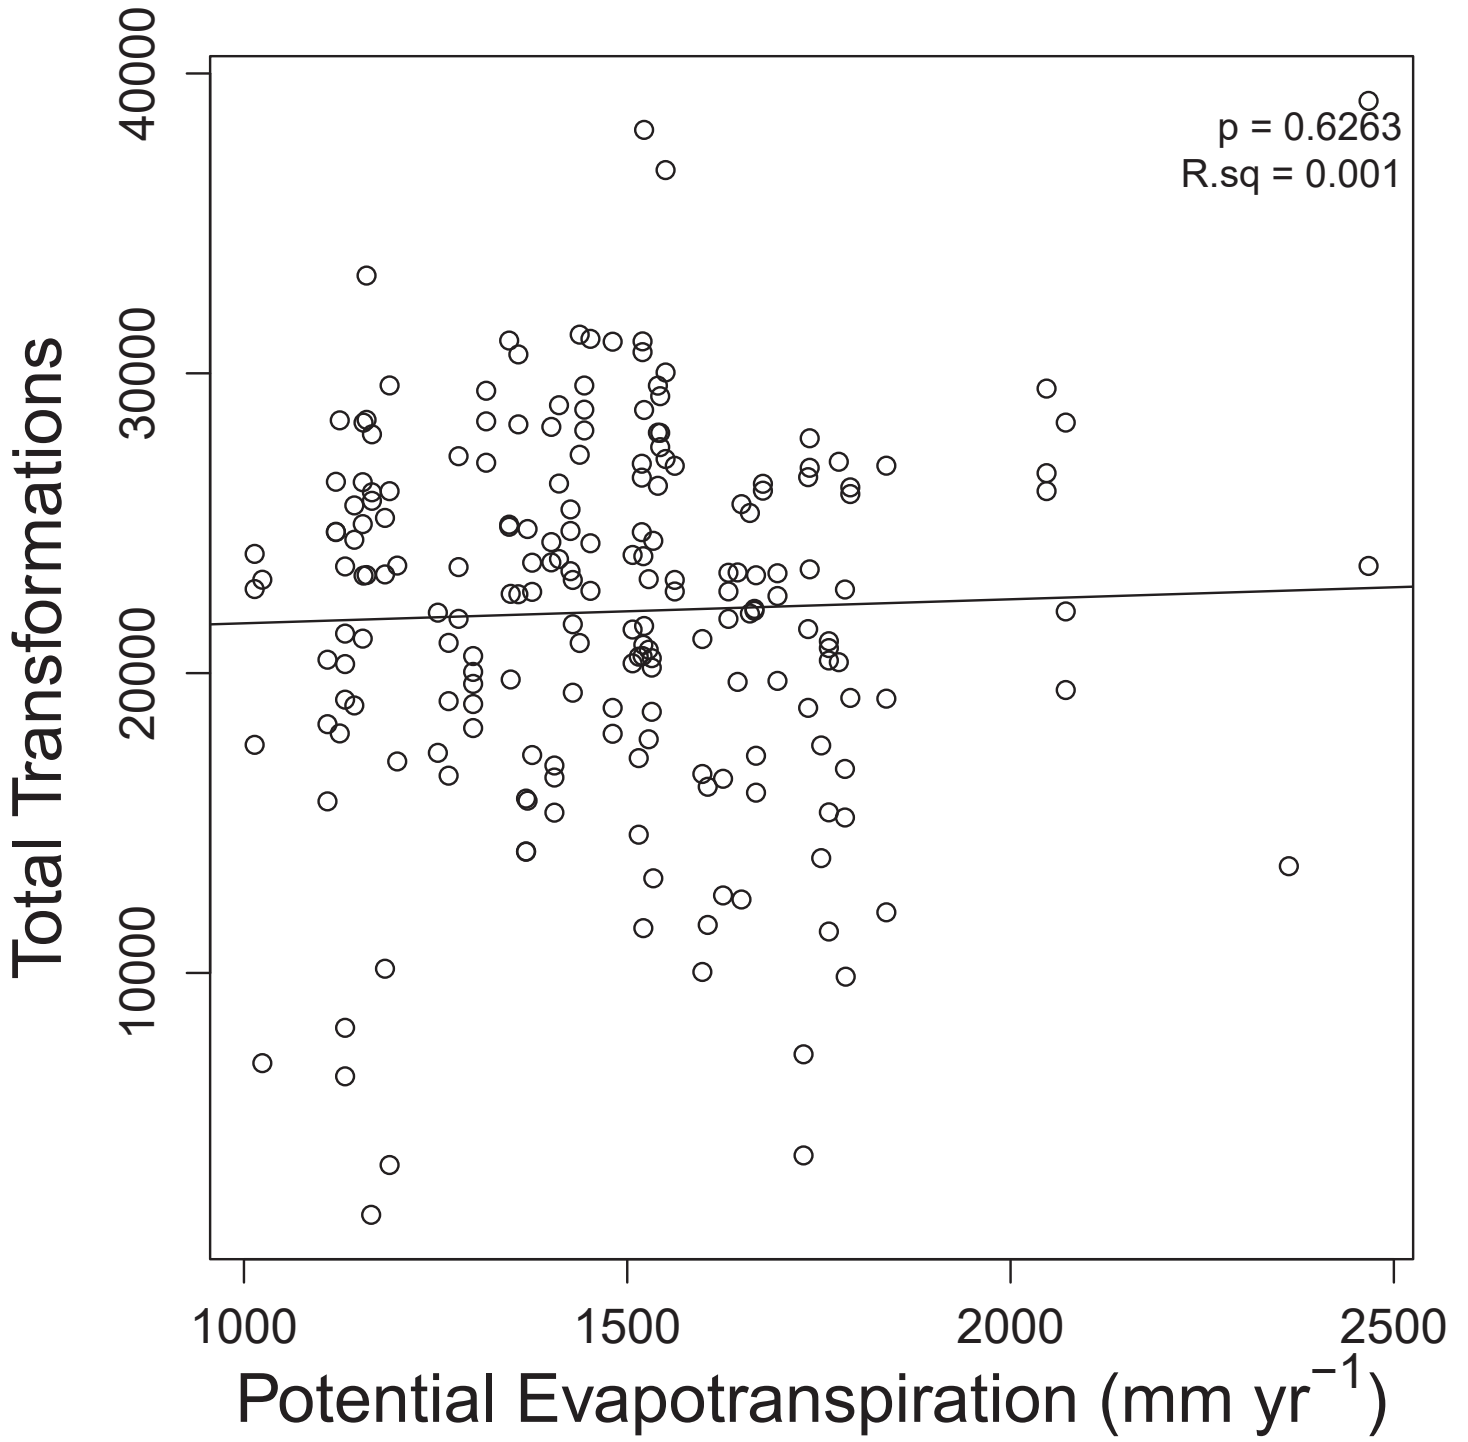

# Surface Water

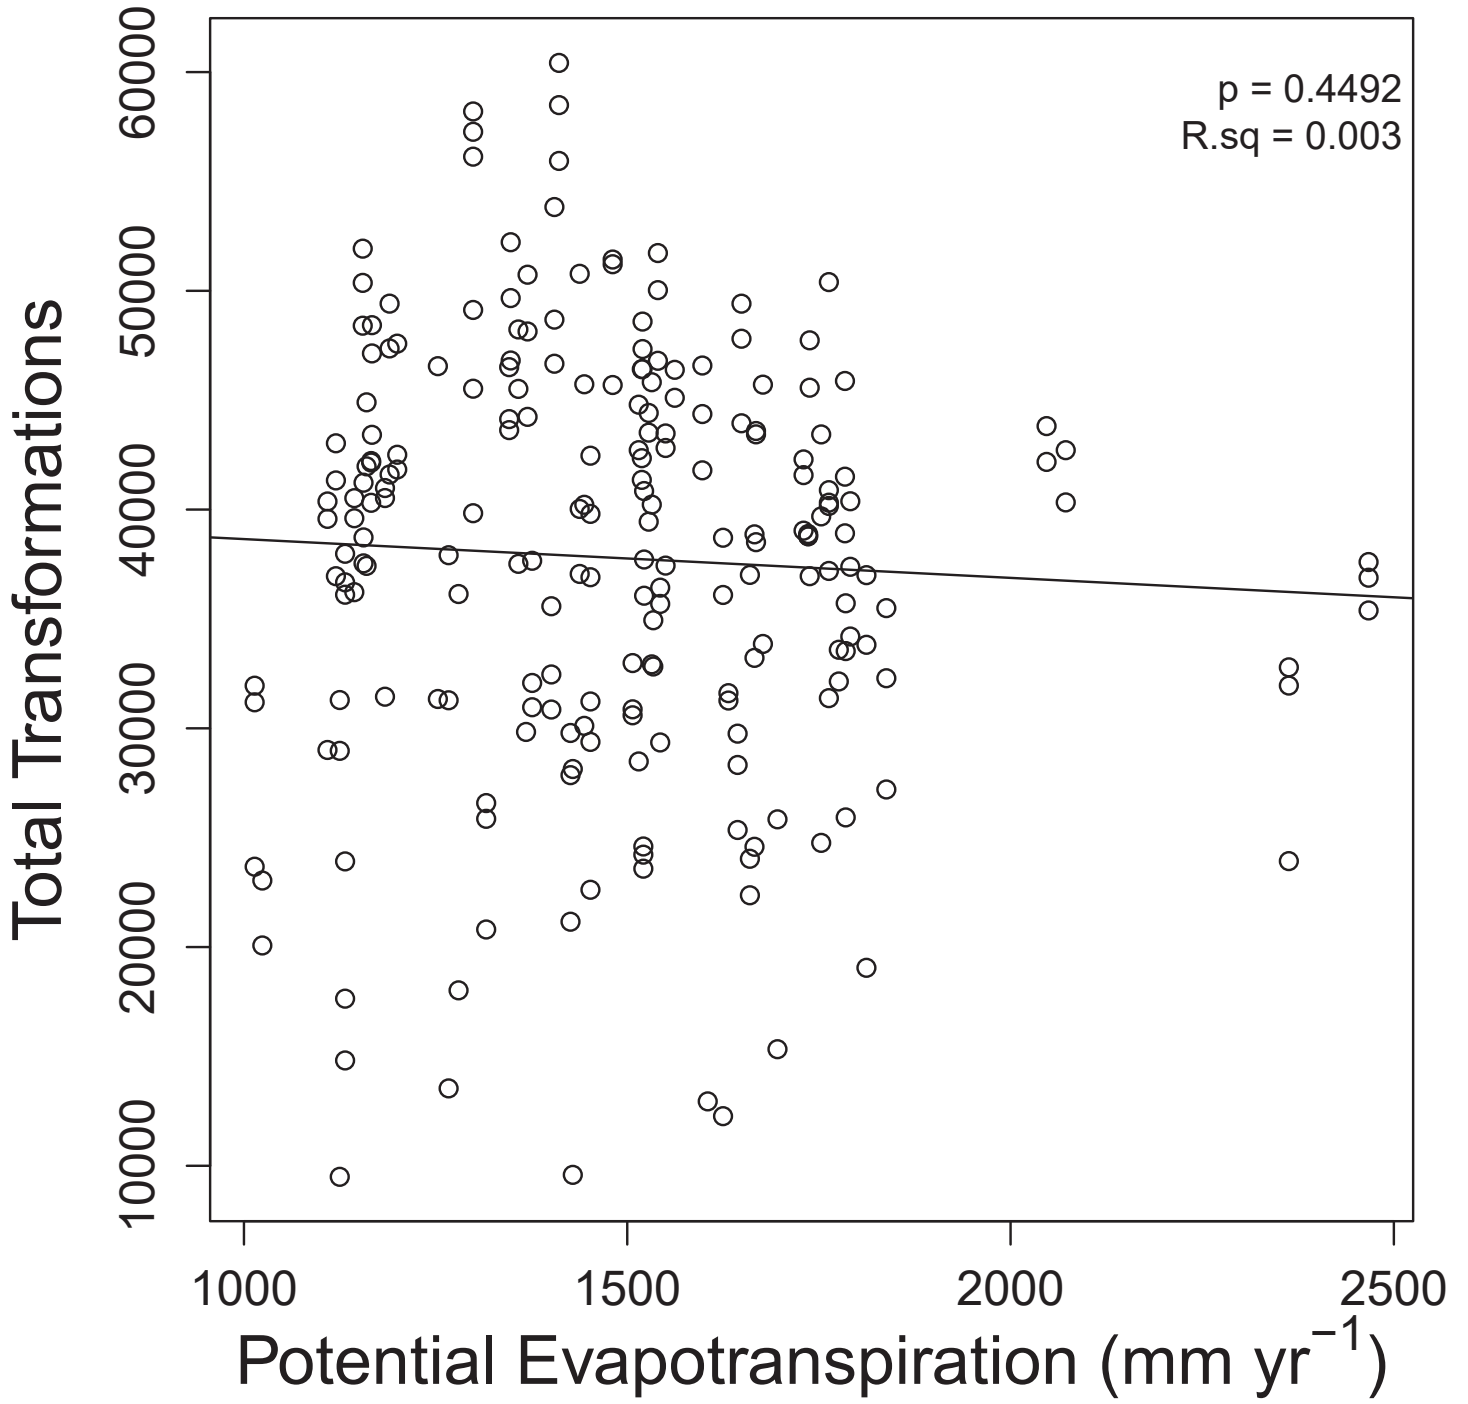

Supplement: Supplementary file 1 [file bg-19-3099-2022-supplement.pdf]
